# Supplementary material for: Silver-catalyzed geminal aminofluorination of diazoketones with anilines and N-fluorobenzenesulphonimide
Source: Royal Society of Chemistry journal article supplement (doi:10.1039/c6qo00813e), 2017-01-01
Supplement: c6qo00813e1.pdf [file c6qo00813e1.pdf]

## Supporting Information

### Silver-Catalyzed Geminal Aminofluorination of Diazoketones with Anilines and *N*-Fluorobenzenesulphonimide

Jun Huang, Linyong Li, Haoguo Chen, Tiebo Xiao, Yuwei He and Lei Zhou\*

School of Chemistry, Sun Yat-sen University, 135 Xingang West Road, Guangzhou 510275, China

E-mail: zhoul39@mail.sysu.edu.cn

**General:** All reactions were performed under an argon atmosphere in a 10 mL microwave tube. 1,2-Dichloroethane was dried over CaH<sub>2</sub> before use. For chromatography, 200-300 mesh silica gel (Qingdao, China) was used. <sup>1</sup>H NMR, <sup>13</sup>C NMR and <sup>19</sup>F NMR spectra were measured recorded on Bruker ARX 400 spectrometer in CDCl<sub>3</sub> or DMSO-*d*<sub>6</sub> solution. MS and HRMS were performed on Thermo MAT95XP. Chemical shifts ( $\delta$ ) were given in ppm, referenced to the residual proton resonance of CDCl<sub>3</sub> (7.26) and DMSO-*d*<sub>6</sub> (2.50), to the carbon resonance of CDCl<sub>3</sub> (77.16) and DMSO-*d*<sub>6</sub> (39.52). Coupling constants (*J*) were given in Hertz (Hz). The term m, q, t, d, s referred to multiplet, quartet, triplet, doublet, singlet. Unless otherwise noted, materials obtained from commercial suppliers were used without further purification.

#### ***General procedure for AgNO<sub>3</sub>-catalyzed gem-aminofluorination of diazoketones with anilines and NFSI:***

A 10 mL snap microwave tube under argon atmosphere was charged with AgNO<sub>3</sub> (6.8 mg, 20 mol %), aniline (0.2 mmol), diazoketone (0.4 mmol), NFSI (0.4 mmol), and K<sub>2</sub>CO<sub>3</sub> (0.4 mmol). Then 2 mL of DCE were added via syringe. The resulting solution was stirred at room temperature for 12 h. After the reaction was completed, the mixture was filtered through a short path of silica gel, eluting with ethyl acetate. The volatile compounds were removed in *vacuo* and the residue was purified by column chromatography (SiO<sub>2</sub>).

**Table S1.** Optimization of reaction conditions using various silver (I) salts, bases and solvents.<sup>a</sup>

| Entry | Catalyst<br>(20 mol %) | Base<br>(2 equiv.)              | Solvent<br>(2 mL) | Yield (%) <sup>b</sup> |           |
|-------|------------------------|---------------------------------|-------------------|------------------------|-----------|
|       |                        |                                 |                   | <b>3a</b>              | <b>4a</b> |
| 1     | AgNO <sub>3</sub>      | K <sub>2</sub> CO <sub>3</sub>  | DCE               | 70                     | 12        |
| 2     | AgOAc                  | K <sub>2</sub> CO <sub>3</sub>  | DCE               | 64                     | 12        |
| 3     | AgOTf                  | K <sub>2</sub> CO <sub>3</sub>  | DCE               | 58                     | 14        |
| 4     | Ag <sub>2</sub> O      | K <sub>2</sub> CO <sub>3</sub>  | DCE               | 56                     | 13        |
| 5     | AgF                    | K <sub>2</sub> CO <sub>3</sub>  | DCE               | 60                     | 13        |
| 6     | AgNO <sub>3</sub>      | Na <sub>2</sub> CO <sub>3</sub> | DCE               | 56                     | 11        |
| 7     | AgNO <sub>3</sub>      | Cs <sub>2</sub> CO <sub>3</sub> | DCE               | <5                     | 35        |
| 8     | AgNO <sub>3</sub>      | Li <sub>2</sub> CO <sub>3</sub> | DCE               | <5                     | 37        |
| 9     | AgNO <sub>3</sub>      | KHCO <sub>3</sub>               | DCE               | 36                     | 10        |
| 10    | AgNO <sub>3</sub>      | K <sub>3</sub> PO <sub>4</sub>  | DCE               | 24                     | 22        |
| 11    | AgNO <sub>3</sub>      | KOH                             | DCE               | 0                      | 30        |
| 12    | AgNO <sub>3</sub>      | K <sub>2</sub> CO <sub>3</sub>  | Toluene           | 30                     | 7         |
| 13    | AgNO <sub>3</sub>      | K <sub>2</sub> CO <sub>3</sub>  | THF               | 40                     | 8         |
| 14    | AgNO <sub>3</sub>      | K <sub>2</sub> CO <sub>3</sub>  | MeCN              | 8                      | 10        |

<sup>a</sup> Reaction conditions: **1a** (0.2 mmol), **2a** (2 equiv.), NFSI (2 equiv.), silver catalyst (20 mol %), base (2 equiv.), solvent (2 mL) under argon at room temperature for 12 h. <sup>b</sup> Yields were determined by <sup>1</sup>H NMR using methyl sulfone as the internal standard.

## Characterization data

### ethyl 4-((1-fluoro-2-oxo-2-(p-tolyl)ethyl)amino)benzoate (**3a**)

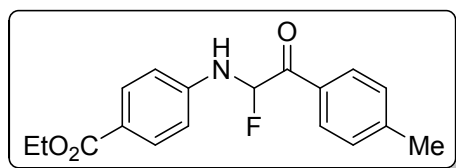

Pale yellow solid (64%, 40 mg, eluent: petroleum ether/ethyl acetate = 10/1); <sup>1</sup>H NMR (400 MHz, CDCl<sub>3</sub>) δ 8.38 (s, 1H), 8.03 (d, *J* = 8.6 Hz, 2H), 7.68 (d, *J* = 8.6 Hz, 2H), 7.38 (d, *J* = 7.7 Hz, 2H), 7.23 (d, *J* = 7.8 Hz, 2H), 5.87 (d, *J*<sub>H-F</sub> = 48.5 Hz, 1H), 4.36 (q, *J* = 7.1 Hz, 2H), 2.36 (s, 3H), 1.39 (t, *J* =

7.1 Hz, 3H);  $^{13}\text{C}$  NMR (101 MHz,  $\text{CDCl}_3$ )  $\delta$  167.1 (d,  $J_{\text{C-F}} = 21.4$  Hz), 166.1, 140.8, 140.0 (d,  $J_{\text{C-F}} = 2.4$  Hz), 131.3 (d,  $J_{\text{C-F}} = 19.2$  Hz), 131.0, 129.7, 126.9 (d,  $J_{\text{C-F}} = 6.3$  Hz), 119.3, 92.0 (d,  $J_{\text{C-F}} = 189.1$  Hz), 61.1, 21.4, 14.5;  $^{19}\text{F}$  NMR (377 MHz,  $\text{CDCl}_3$ )  $\delta$  -173.75 (dd,  $J_{\text{H-F}} = 49.3$  Hz,  $J_{\text{C-F}} = 6.3$  Hz); EI-MS ( $m/z$ , relative intensity): 315 ( $\text{M}^+$ , 11), 192 (26), 164 (21), 149 (51), 123 (100), 91 (27), 77 (34); HRMS (EI) calcd. for  $\text{C}_{18}\text{H}_{18}\text{O}_3\text{NF}$  [ $\text{M}$ ] $^+$  315.1265, found: 315.1262.

#### ethyl 4-((2-oxo-2-(p-tolyl)ethyl)amino)benzoate (4a)

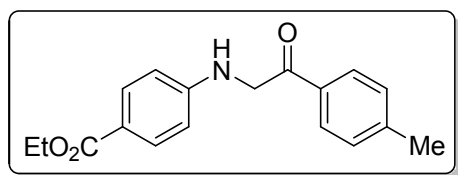

White solid;  $^1\text{H}$  NMR (400 MHz,  $\text{CDCl}_3$ )  $\delta$  7.95 (d,  $J = 8.1$  Hz, 2H), 7.50 (d,  $J = 8.3$  Hz, 2H), 7.42 (s, 1H), 7.24 – 7.15 (m), 4.34 (q,  $J = 7.0$  Hz, 2H), 3.71 (s, 2H), 2.36 (s, 3H), 1.37 (t,  $J = 7.1$  Hz, 3H);  $^{13}\text{C}$  NMR (101 MHz,  $\text{CDCl}_3$ )  $\delta$  169.7, 166.2, 141.9, 137.7, 131.0, 130.8, 130.1, 129.5, 126.1, 118.9, 61.0, 44.6, 21.2, 14.4; EI-MS ( $m/z$ , relative intensity): 297 ( $\text{M}^+$ , 20), 252 (7), 192 (3), 165 (32), 132 (74), 105 (100), 91 (17), 77 (20); HRMS (EI) calcd. for  $\text{C}_{18}\text{H}_{19}\text{O}_3\text{N}$  [ $\text{M}$ ] $^+$  297.1359, found: 297.1362.

#### ethyl 4-((1-fluoro-2-oxo-2-phenylethyl)amino)benzoate (3b)

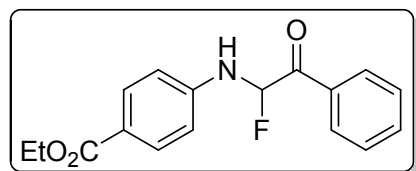

Pale yellow solid (68%, 41 mg, eluent: petroleum ether/ethyl acetate = 10/1);  $^1\text{H}$  NMR (400 MHz,  $\text{CDCl}_3$ )  $\delta$  8.38 (s, 1H), 8.03 (d,  $J = 8.7$  Hz, 2H), 7.68 (d,  $J = 8.7$  Hz, 2H), 7.55 – 7.47 (m, 2H), 7.46 – 7.38 (m, 3H), 5.91 (d,  $J_{\text{H-F}} = 48.4$  Hz, 1H), 4.36 (q,  $J = 7.1$  Hz, 2H), 1.39 (t,  $J = 7.1$  Hz, 3H);  $^{13}\text{C}$  NMR (101 MHz,  $\text{CDCl}_3$ )  $\delta$  166.8 (d,  $J_{\text{C-F}} = 21.1$  Hz), 166.1, 140.8, 134.2 (d,  $J_{\text{C-F}} = 19.3$  Hz), 131.0, 129.9 (d,  $J_{\text{C-F}} = 2.1$  Hz), 129.0, 127.0, 126.7 (d,  $J_{\text{C-F}} = 6.6$  Hz), 119.4, 92.0 (d,  $J_{\text{C-F}} = 189.8$  Hz), 61.1, 14.4;  $^{19}\text{F}$  NMR (377 MHz,  $\text{CDCl}_3$ )  $\delta$  -176.02 (dd,  $J_{\text{H-F}} = 48.4$  Hz,  $J_{\text{C-F}} = 6.3$  Hz); EI-MS ( $m/z$ , relative intensity): 301 ( $\text{M}^+$ , 19), 256 (6), 192 (57), 164 (32), 149 (39), 109 (100), 91 (33), 77 (14); HRMS (EI) calcd. for  $\text{C}_{17}\text{H}_{16}\text{O}_3\text{NF}$  [ $\text{M}$ ] $^+$  301.1109, found: 301.1107.

**ethyl 4-((1-fluoro-2-(4-methoxyphenyl)-2-oxoethyl)amino)benzoate (3c)**

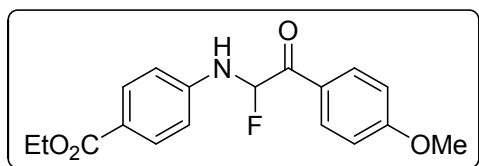

Pale yellow solid (44%, 29 mg, eluent: petroleum ether/ethyl acetate = 10/1);  $^1\text{H}$  NMR (400 MHz,  $\text{CDCl}_3$ )  $\delta$  8.37 (d,  $J = 5.6$  Hz, 1H), 8.04 (d,  $J = 8.6$  Hz, 2H), 7.69 (d,  $J = 8.6$  Hz, 2H), 7.41 (d,  $J = 7.8$  Hz, 2H), 6.94 (d,  $J = 8.4$  Hz, 2H), 5.85 (d,  $J_{\text{H-F}} = 48.7$  Hz, 1H), 4.36 (q,  $J = 7.1$  Hz, 2H), 3.81 (s, 3H), 1.39 (t,  $J = 7.1$  Hz, 3H);  $^{13}\text{C}$  NMR (101 MHz,  $\text{CDCl}_3$ )  $\delta$  167.1 (d,  $J_{\text{C-F}} = 21.7$  Hz), 166.1, 161.0 (d,  $J_{\text{C-F}} = 2.5$  Hz), 140.8, 131.0, 128.8 (d,  $J_{\text{C-F}} = 5.8$  Hz), 127.0, 126.4 (d,  $J_{\text{C-F}} = 19.7$  Hz), 119.3, 114.5, 92.0 (d,  $J_{\text{C-F}} = 188.5$  Hz), 61.1, 55.5, 14.5;  $^{19}\text{F}$  NMR (377 MHz,  $\text{CDCl}_3$ )  $\delta$  -170.11 (dd,  $J_{\text{H-F}} = 49.1$  Hz,  $J_{\text{C-F}} = 7.7$  Hz); EI-MS ( $m/z$ , relative intensity): 331 ( $\text{M}^+$ , 3), 286 (1), 192 (4), 164 (5), 149 (5), 139 (100), 91 (18), 77 (16); HRMS (EI) calcd. for  $\text{C}_{18}\text{H}_{18}\text{O}_4\text{NF}$  [ $\text{M}$ ] $^+$  331.1214, found: 331.1217.

**ethyl 4-((1-fluoro-2-(4-fluorophenyl)-2-oxoethyl)amino)benzoate (3d)**

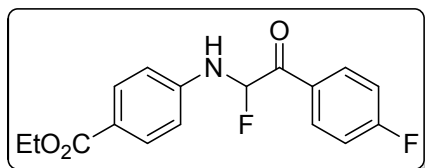

Pale yellow solid (60%, 38 mg, eluent: petroleum ether/ethyl acetate = 5/1);  $^1\text{H}$  NMR (400 MHz,  $\text{CDCl}_3$ )  $\delta$  8.43 (d,  $J = 4.9$  Hz, 1H), 8.06 (d,  $J = 8.6$  Hz, 2H), 7.71 (d,  $J = 8.6$  Hz, 2H), 7.55 – 7.47 (m, 2H), 7.13 (t,  $J = 8.5$  Hz, 2H), 5.91 (d,  $J_{\text{H-F}} = 48.3$  Hz, 1H), 4.39 (q,  $J = 7.1$  Hz, 2H), 1.41 (t,  $J = 7.1$  Hz, 3H);  $^{13}\text{C}$  NMR (101 MHz,  $\text{CDCl}_3$ )  $\delta$  166.6 (d,  $J_{\text{C-F}} = 21.1$  Hz), 166.1, 140.7, 131.0, 128.9, 128.9 (d,  $J_{\text{C-F}} = 1.9$  Hz), 128.8, 127.1, 119.4, 116.1 (d,  $J_{\text{C-F}} = 22.0$  Hz), 91.3 (d,  $J = 190.1$  Hz), 61.1, 14.4;  $^{19}\text{F}$  NMR (377 MHz,  $\text{CDCl}_3$ )  $\delta$  -111.05 – -111.17 (m), -174.67 (d,  $J_{\text{H-F}} = 48.3$  Hz); EI-MS ( $m/z$ , relative intensity): 319 ( $\text{M}^+$ , 4), 274 (1), 192 (16), 164 (10), 149 (8), 139 (19), 91 (25), 77 (100); HRMS (EI) calcd. for  $\text{C}_{17}\text{H}_{15}\text{O}_3\text{NF}_2$  [ $\text{M}$ ] $^+$  319.1015, found: 319.1012.

**ethyl 4-((2-(4-chlorophenyl)-1-fluoro-2-oxoethyl)amino)benzoate (3e)**

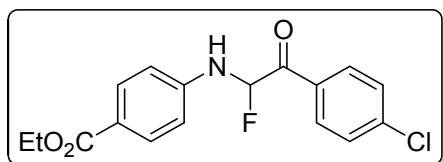

Pale yellow solid (65%, 43 mg, eluent: petroleum ether/ethyl acetate = 5/1);  $^1\text{H}$  NMR

(400 MHz, CDCl<sub>3</sub>)  $\delta$  8.38 (s, 1H), 8.03 (d,  $J$  = 8.5 Hz, 2H), 7.67 (d,  $J$  = 8.5 Hz, 2H), 7.42 (dd,  $J$  = 23.6, 8.3 Hz, 4H), 5.88 (d,  $J$  = 48.2 Hz, 1H), 4.36 (q,  $J$  = 7.1 Hz, 2H), 1.38 (t,  $J$  = 7.1 Hz, 3H); <sup>13</sup>C NMR (101 MHz, CDCl<sub>3</sub>)  $\delta$  166.4 (d,  $J_{C-F}$  = 20.7 Hz), 166.1, 140.6, 135.9 (d,  $J_{C-F}$  = 2.5 Hz), 132.7 (d,  $J_{C-F}$  = 19.7 Hz), 131.0, 129.2, 128.0 (d,  $J_{C-F}$  = 6.8 Hz), 127.1, 119.4, 91.2 (d,  $J_{C-F}$  = 190.8 Hz), 61.1, 14.4; <sup>19</sup>F NMR (377 MHz, CDCl<sub>3</sub>)  $\delta$  -177.43 (dd,  $J_{H-F}$  = 49.0 Hz,  $J_{C-F}$  = 6.4 Hz); EI-MS ( $m/z$ , relative intensity): 335 (M<sup>+</sup>, 15), 242 (9), 192 (100), 164 (52), 149 (36), 143 (81), 91 (29), 76 (13); HRMS (EI) calcd. for C<sub>17</sub>H<sub>15</sub>O<sub>3</sub>NCIF [M]<sup>+</sup> 335.0719, found: 335.0717.

**ethyl 4-((2-(3-chlorophenyl)-1-fluoro-2-oxoethyl)amino)benzoate (3f)**

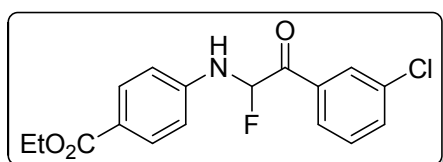

Pale yellow solid (53%, 35 mg, eluent: petroleum ether/ethyl acetate = 10/1); <sup>1</sup>H NMR (400 MHz, CDCl<sub>3</sub>)  $\delta$  8.34 (d,  $J$  = 4.9 Hz, 1H), 8.04 (d,  $J$  = 8.4 Hz, 2H), 7.67 (d,  $J$  = 8.5 Hz, 2H), 7.51 (s, 1H), 7.44 – 7.32 (m, 3H), 5.88 (d,  $J_{H-F}$  = 48.1 Hz, 1H), 4.36 (q,  $J$  = 7.1 Hz, 2H), 1.39 (t,  $J$  = 7.1 Hz, 3H); <sup>13</sup>C NMR (101 MHz, CDCl<sub>3</sub>)  $\delta$  166.3, 166.1, 140.6, 136.0 (d,  $J_{C-F}$  = 19.7 Hz), 135.0, 131.0, 130.0 (d,  $J_{C-F}$  = 1.3 Hz), 127.1, 126.5 (d,  $J_{C-F}$  = 7.6 Hz), 124.7 (d,  $J_{C-F}$  = 6.9 Hz), 119.4, 91.0 (d,  $J_{C-F}$  = 191.8 Hz), 61.2, 14.5; <sup>19</sup>F NMR (377 MHz, CDCl<sub>3</sub>)  $\delta$  -179.05 (dd,  $J_{H-F}$  = 48.4 Hz,  $J_{C-F}$  = 7.0 Hz); EI-MS ( $m/z$ , relative intensity): 335 (M<sup>+</sup>, 18), 242 (6), 192 (100), 164 (29), 149 (9), 143 (28), 91 (6), 76 (4); HRMS (EI) calcd. for C<sub>17</sub>H<sub>15</sub>O<sub>3</sub>NCIF [M]<sup>+</sup> 335.0719, found: 335.0720.

**ethyl 4-((2-(2-chlorophenyl)-1-fluoro-2-oxoethyl)amino)benzoate (3g)**

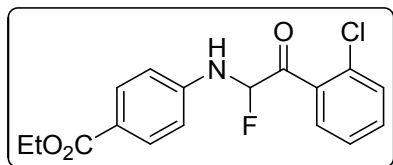

Pale yellow solid (56%, 37 mg, eluent: petroleum ether/ethyl acetate = 10/1); <sup>1</sup>H NMR (400 MHz, CDCl<sub>3</sub>)  $\delta$  8.46 (d,  $J$  = 5.1 Hz, 1H), 8.05 (d,  $J$  = 8.5 Hz, 2H), 7.70 (d,  $J$  = 8.5 Hz, 2H), 7.45 (t,  $J$  = 7.2 Hz, 2H), 7.40 – 7.28 (m, 2H), 6.29 (d,  $J_{H-F}$  = 47.5 Hz, 1H), 4.37 (q,  $J$  = 7.1 Hz, 2H), 1.39 (t,  $J$  = 7.1 Hz, 3H); <sup>13</sup>C NMR (101 MHz, CDCl<sub>3</sub>)  $\delta$  166.3, 166.1, 140.7, 134.7 (d,  $J_{C-F}$  = 4.1 Hz), 132.3 (d,  $J_{C-F}$  =

18.5 Hz), 131.5 (d,  $J_{C-F} = 2.8$  Hz), 131.0, 130.4, 129.7 (d,  $J_{C-F} = 5.4$  Hz), 127.5, 127.0, 119.3, 89.2 (d,  $J_{C-F} = 189.5$  Hz), 61.1, 14.5;  $^{19}\text{F}$  NMR (377 MHz,  $\text{CDCl}_3$ )  $\delta$  -174.06 (dd,  $J_{H-F} = 47.9$  Hz,  $J_{C-F} = 7.2$  Hz); EI-MS ( $m/z$ , relative intensity): 335 ( $\text{M}^+$ , 18), 242 (9), 192 (100), 164 (49), 149 (12), 143 (46), 91 (10), 76 (6); HRMS (EI) calcd. for  $\text{C}_{17}\text{H}_{15}\text{O}_3\text{NCIF}$   $[\text{M}]^+$  335.0719, found: 335.0721.

### ethyl 4-((2-((1,1'-biphenyl)-4-yl)-1-fluoro-2-oxoethyl)amino)benzoate (3h)

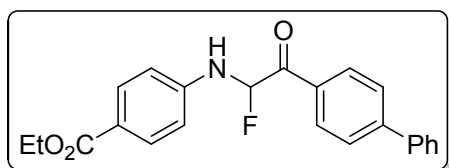

Pale yellow solid (58%, 44 mg, eluent: petroleum ether/ethyl acetate = 10/1);  $^1\text{H}$  NMR (400 MHz,  $\text{CDCl}_3$ )  $\delta$  8.45 (d,  $J = 5.7$  Hz, 1H), 8.05 (d,  $J = 8.6$  Hz, 2H), 7.72 (d,  $J = 8.6$  Hz, 2H), 7.64 (d,  $J = 8.1$  Hz, 2H), 7.58 (d,  $J = 8.5$  Hz, 4H), 7.45 (t,  $J = 7.4$  Hz, 2H), 7.37 (t,  $J = 7.3$  Hz, 1H), 5.96 (d,  $J_{H-F} = 48.4$  Hz, 1H), 4.37 (q,  $J = 7.1$  Hz, 2H), 1.39 (t,  $J = 7.1$  Hz, 3H);  $^{13}\text{C}$  NMR (101 MHz,  $\text{CDCl}_3$ )  $\delta$  166.8 (d,  $J_{C-F} = 21.2$  Hz), 166.1, 142.9 (d,  $J_{C-F} = 2.2$  Hz), 140.8, 140.3, 133.1 (d,  $J_{C-F} = 19.3$  Hz), 131.0, 129.0, 127.9, 127.7, 127.3, 127.2 (d,  $J_{C-F} = 6.4$  Hz), 127.0, 119.3, 91.8 (d,  $J_{C-F} = 189.9$  Hz), 61.1, 14.4;  $^{19}\text{F}$  NMR (377 MHz,  $\text{CDCl}_3$ )  $\delta$  -175.73 (dd,  $J_{H-F} = 48.7$  Hz,  $J_{C-F} = 7.4$  Hz); EI-MS ( $m/z$ , relative intensity): 377 ( $\text{M}^+$ , 6), 284 (5), 192 (10), 185 (100), 165 (38), 119 (17), 91 (13), 76 (4); HRMS (EI) calcd. for  $\text{C}_{23}\text{H}_{20}\text{O}_3\text{NF}$   $[\text{M}]^+$  377.1422, found: 377.1424.

### ethyl 4-((1-fluoro-2-(naphthalen-2-yl)-2-oxoethyl)amino)benzoate (3i)

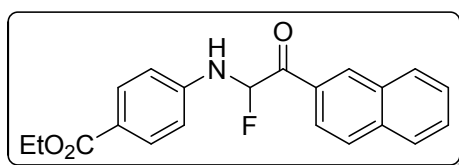

Pale yellow solid (64%, 45 mg, eluent: petroleum ether/ethyl acetate = 10/1);  $^1\text{H}$  NMR (400 MHz,  $\text{CDCl}_3$ )  $\delta$  8.50 (s, 1H), 8.06 – 7.96 (m, 3H), 7.91 – 7.82 (m, 3H), 7.70 (d,  $J = 8.6$  Hz, 2H), 7.61 – 7.48 (m, 3H), 6.07 (d,  $J_{H-F} = 48.3$  Hz, 1H), 4.37 (q,  $J = 7.1$  Hz, 2H), 1.39 (t,  $J = 7.1$  Hz, 3H);  $^{13}\text{C}$  NMR (101 MHz,  $\text{CDCl}_3$ )  $\delta$  166.8 (d,  $J_{C-F} = 21.1$  Hz), 166.1, 140.8, 133.8, 133.0, 131.5 (d,  $J_{C-F} = 19.1$  Hz), 130.9, 129.0, 128.4, 127.9, 127.1, 126.9, 126.8, 126.8, 126.7, 123.4 (d,  $J_{C-F} = 5.4$  Hz), 119.4, 92.2 (d,  $J_{C-F} = 190.0$  Hz), 61.1, 14.4;  $^{19}\text{F}$  NMR (377 MHz,  $\text{CDCl}_3$ )  $\delta$

-175.76 (dd,  $J_{\text{H-F}} = 49.1$  Hz,  $J_{\text{C-F}} = 6.0$  Hz); EI-MS ( $m/z$ , relative intensity): 351 ( $\text{M}^+$ , 7), 258 (6), 192 (9), 168 (7), 159 (100), 119 (19), 91 (16), 77 (11); HRMS (EI) calcd. for  $\text{C}_{21}\text{H}_{18}\text{O}_3\text{NF}$  [ $\text{M}$ ] $^+$  351.1265, found: 351.1267.

### 2-fluoro-2-((4-fluorophenyl)amino)-1-(p-tolyl)ethan-1-one (3j)

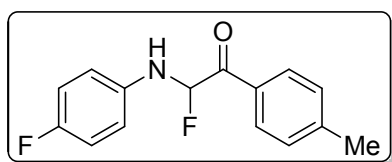

Pale yellow solid (63%, 33 mg, eluent: petroleum ether/ethyl acetate = 5/1);  $^1\text{H}$  NMR (400 MHz,  $\text{CDCl}_3$ )  $\delta$  8.19 (s, 1H), 7.62 – 7.50 (m, 2H), 7.38 (d,  $J = 7.3$  Hz, 2H), 7.23 (d,  $J = 7.8$  Hz, 2H), 7.04 (t,  $J = 8.6$  Hz, 2H), 5.85 (d,  $J_{\text{H-F}} = 48.6$  Hz, 1H), 2.37 (s, 3H);  $^{13}\text{C}$  NMR (101 MHz,  $\text{CDCl}_3$ )  $\delta$  166.8 (d,  $J_{\text{C-F}} = 21.1$  Hz), 159.9 (d,  $J_{\text{C-F}} = 244.4$  Hz), 140.0 (d,  $J_{\text{C-F}} = 2.7$  Hz), 132.8 (d,  $J_{\text{C-F}} = 2.7$  Hz), 131.6 (d,  $J_{\text{C-F}} = 19.3$  Hz), 129.7, 126.9 (d,  $J_{\text{C-F}} = 6.2$  Hz), 122.0 (d,  $J_{\text{C-F}} = 8.0$  Hz), 115.9 (d,  $J_{\text{C-F}} = 22.6$  Hz), 92.0 (d,  $J_{\text{C-F}} = 188.7$  Hz), 21.4;  $^{19}\text{F}$  NMR (377 MHz,  $\text{CDCl}_3$ )  $\delta$  -116.90 – -117.00 (m), -173.42 (dd,  $J_{\text{H-F}} = 48.7$  Hz,  $J_{\text{C-F}} = 4.7$  Hz); EI-MS ( $m/z$ , relative intensity): 261 ( $\text{M}^+$ , 16), 213 (20), 149 (8), 123 (100), 109 (43), 91 (13), 77 (35); HRMS (EI) calcd. for  $\text{C}_{15}\text{H}_{13}\text{ONF}_2$  [ $\text{M}$ ] $^+$  261.0960, found: 261.0958.

### 2-((4-bromophenyl)amino)-2-fluoro-1-(p-tolyl)ethan-1-one (3k)

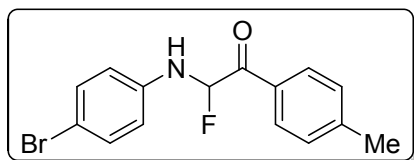

Pale yellow solid (56%, 36 mg, eluent: petroleum ether/ethyl acetate = 25/1);  $^1\text{H}$  NMR (400 MHz,  $\text{CDCl}_3$ )  $\delta$  8.23 (s, 1H), 7.50 (d,  $J = 8.9$  Hz, 2H), 7.45 (d,  $J = 8.9$  Hz, 2H), 7.37 (d,  $J = 7.4$  Hz, 2H), 7.22 (d,  $J = 7.8$  Hz, 2H), 5.84 (d,  $J_{\text{H-F}} = 48.6$  Hz, 1H), 2.37 (s, 3H);  $^{13}\text{C}$  NMR (101 MHz,  $\text{CDCl}_3$ )  $\delta$  166.8 (d,  $J_{\text{C-F}} = 21.3$  Hz), 140.0 (d,  $J_{\text{C-F}} = 2.6$  Hz), 135.9, 132.2, 131.4 (d,  $J_{\text{C-F}} = 19.2$  Hz), 129.7, 126.9 (d,  $J_{\text{C-F}} = 6.2$  Hz), 121.7, 117.8, 92.0 (d,  $J_{\text{C-F}} = 188.7$  Hz), 21.4;  $^{19}\text{F}$  NMR (377 MHz,  $\text{CDCl}_3$ )  $\delta$  -173.55 (dd,  $J_{\text{H-F}} = 49.1$  Hz,  $J_{\text{C-F}} = 6.8$  Hz); EI-MS ( $m/z$ , relative intensity): 321 ( $\text{M}^+$ , 5), 275 (7), 149 (18), 123 (100), 109 (26), 91 (30), 77 (29); HRMS (EI) calcd. for  $\text{C}_{15}\text{H}_{13}\text{ONBrF}$  [ $\text{M}$ ] $^+$  321.0159, found: 321.0161.

### 2-fluoro-1-(p-tolyl)-2-((4-(trifluoromethyl)phenyl)amino)ethan-1-one (3l)

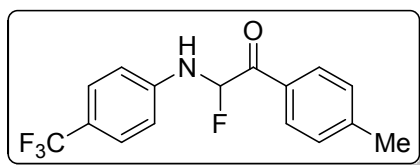

Pale yellow solid (73%, 45 mg, eluent: petroleum ether/ethyl acetate = 20/1);  $^1\text{H}$  NMR (400 MHz,  $\text{DMSO-}d_6$ )  $\delta$  10.70 (s, 1H), 7.92 (d,  $J = 8.4$  Hz, 2H), 7.69 (d,  $J = 8.5$  Hz, 2H), 7.45 (d,  $J = 7.5$  Hz, 2H), 7.25 (d,  $J = 7.7$  Hz, 2H), 6.05 (d,  $J_{\text{H-F}} = 47.5$  Hz, 1H), 2.31 (s, 3H);  $^{13}\text{C}$  NMR (101 MHz,  $\text{DMSO-}d_6$ )  $\delta$  167.4 (d,  $J_{\text{C-F}} = 24.8$  Hz), 141.7, 139.2 (d,  $J_{\text{C-F}} = 2.6$  Hz), 132.3 (d,  $J_{\text{C-F}} = 20.0$  Hz), 129.3, 127.2 (d,  $J_{\text{C-F}} = 5.3$  Hz), 126.0 (q,  $J_{\text{C-F}} = 3.5$  Hz), 124.3 (q,  $J_{\text{C-F}} = 271.5$  Hz), 124.2 (q,  $J_{\text{C-F}} = 32.1$  Hz), 120.0, 90.5 (d,  $J_{\text{C-F}} = 183.4$  Hz), 20.8;  $^{19}\text{F}$  NMR (377 MHz,  $\text{DMSO-}d_6$ )  $\delta$  -60.54 (s, 3F), -172.37 (d,  $J_{\text{H-F}} = 47.5$  Hz, 1F); EI-MS ( $m/z$ , relative intensity): 311 ( $\text{M}^+$ , 8), 188 (10), 149 (37), 123 (100), 109 (27), 91 (11), 77 (24); HRMS (EI) calcd. for  $\text{C}_{16}\text{H}_{13}\text{ONF}_4$  [ $\text{M}$ ] $^+$  311.0928, found: 311.0925.

### 4-((1-fluoro-2-oxo-2-(p-tolyl)ethyl)amino)benzonitrile (3m)

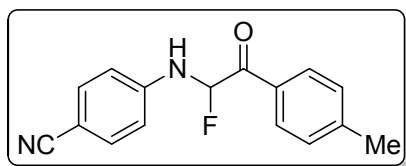

Pale yellow solid (67%, 36 mg, eluent: petroleum ether/ethyl acetate = 5/1);  $^1\text{H}$  NMR (400 MHz,  $\text{CDCl}_3$ )  $\delta$  8.51 (d,  $J = 4.0$  Hz, 1H), 7.74 (d,  $J = 8.7$  Hz, 2H), 7.61 (d,  $J = 8.7$  Hz, 2H), 7.36 (d,  $J = 7.5$  Hz, 2H), 7.22 (d,  $J = 7.9$  Hz, 2H), 5.86 (d,  $J_{\text{H-F}} = 48.4$  Hz, 1H), 2.36 (s, 3H);  $^{13}\text{C}$  NMR (101 MHz,  $\text{CDCl}_3$ )  $\delta$  167.3 (d,  $J_{\text{C-F}} = 21.8$  Hz), 140.9, 140.2 (d,  $J_{\text{C-F}} = 2.5$  Hz), 133.4, 131.1 (d,  $J_{\text{C-F}} = 19.4$  Hz), 129.7, 126.8 (d,  $J_{\text{C-F}} = 6.2$  Hz), 120.1, 118.7, 108.1, 91.9 (d,  $J_{\text{C-F}} = 189.0$  Hz), 21.4;  $^{19}\text{F}$  NMR (377 MHz,  $\text{CDCl}_3$ )  $\delta$  -173.99 (d,  $J_{\text{H-F}} = 47.1$  Hz); EI-MS ( $m/z$ , relative intensity): 268 ( $\text{M}^+$ , 9), 220 (3), 145 (8), 123 (100), 117 (13), 90 (14), 77 (24); HRMS (EI) calcd. for  $\text{C}_{16}\text{H}_{13}\text{ON}_2\text{F}$  [ $\text{M}$ ] $^+$  268.1006, found: 268.1005.

### 2-((3-chlorophenyl)amino)-2-fluoro-1-(p-tolyl)ethan-1-one (3n)

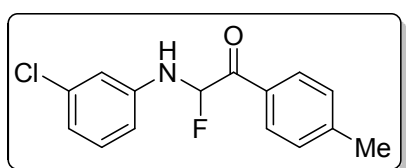

Pale yellow solid (76%, 42 mg, eluent: petroleum ether/ethyl acetate = 20/1);  $^1\text{H}$  NMR (400 MHz,  $\text{CDCl}_3$ )  $\delta$  8.26 (s, 1H), 7.73 (s, 1H), 7.47 – 7.34 (m,



3H), 7.30 – 7.20 (m, 3H), 7.14 (d,  $J = 8.0$  Hz, 1H), 5.85 (d,  $J_{\text{H-F}} = 48.6$  Hz, 1H), 2.37 (s, 3H);  $^{13}\text{C}$  NMR (101 MHz,  $\text{CDCl}_3$ )  $\delta$  166.9 (d,  $J_{\text{C-F}} = 21.4$  Hz), 140.0 (d,  $J_{\text{C-F}} = 2.5$  Hz), 137.9, 134.9, 131.4 (d,  $J_{\text{C-F}} = 19.3$  Hz), 130.2, 129.6, 126.9 (d,  $J_{\text{C-F}} = 6.1$  Hz), 125.2, 120.3, 118.1, 92.0 (d,  $J_{\text{C-F}} = 188.8$  Hz), 21.4;  $^{19}\text{F}$  NMR (377 MHz,  $\text{CDCl}_3$ )  $\delta$  -173.64 (dd,  $J_{\text{H-F}} = 49.3$  Hz,  $J_{\text{C-F}} = 7.2$  Hz); EI-MS ( $m/z$ , relative intensity): 277 ( $\text{M}^+$ , 12), 222 (1), 154 (15), 123 (100), 109 (35), 91 (12), 77 (31); HRMS (EI) calcd. for  $\text{C}_{15}\text{H}_{13}\text{ONCIF}$  [ $\text{M}$ ] $^+$  277.0664, found: 277.0662.

### 3-((1-fluoro-2-oxo-2-(p-tolyl)ethyl)amino)benzonitrile (3o)

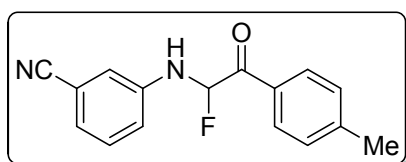

Pale yellow solid (62%, 33 mg, eluent: petroleum ether/ethyl acetate = 10/1);  $^1\text{H}$  NMR (400 MHz,  $\text{CDCl}_3$ )  $\delta$  8.43 (d,  $J = 4.2$  Hz, 1H), 8.02 (s, 1H), 7.83 – 7.74 (m, 1H), 7.46 – 7.41 (m, 2H), 7.37 (d,  $J = 7.8$  Hz, 2H), 7.23 (d,  $J = 7.7$  Hz, 2H), 5.87 (d,  $J_{\text{H-F}} = 48.4$  Hz, 1H), 2.37 (s, 3H);  $^{13}\text{C}$  NMR (101 MHz,  $\text{CDCl}_3$ )  $\delta$  167.3 (d,  $J_{\text{C-F}} = 21.8$  Hz), 140.1 (d,  $J_{\text{C-F}} = 2.6$  Hz), 137.7, 131.1 (d,  $J_{\text{C-F}} = 19.4$  Hz), 130.1, 129.7, 128.5, 126.8 (d,  $J_{\text{C-F}} = 6.1$  Hz), 124.3, 123.3, 118.4, 113.3, 91.9 (d,  $J_{\text{C-F}} = 188.9$  Hz), 21.4;  $^{19}\text{F}$  NMR (377 MHz,  $\text{CDCl}_3$ )  $\delta$  -174.21 (dd,  $J_{\text{H-F}} = 49.1$  Hz,  $J_{\text{C-F}} = 7.2$  Hz); EI-MS ( $m/z$ , relative intensity): 268 ( $\text{M}^+$ , 9), 220 (2), 145 (7), 123 (100), 117 (11), 90 (10), 77 (22); HRMS (EI) calcd. for  $\text{C}_{16}\text{H}_{13}\text{ON}_2\text{F}$  [ $\text{M}$ ] $^+$  268.1006, found: 268.1004.

### 2-((1-fluoro-2-oxo-2-(p-tolyl)ethyl)amino)benzonitrile (3p)

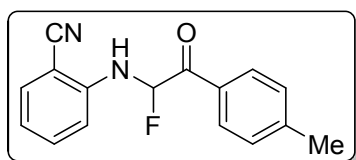

Pale yellow solid (60%, 32 mg, eluent: petroleum ether/ethyl acetate = 5/1);  $^1\text{H}$  NMR (400 MHz,  $\text{CDCl}_3$ )  $\delta$  8.68 (s, 1H), 8.36 (d,  $J = 8.4$  Hz, 1H), 7.64 – 7.52 (m, 2H), 7.38 (d,  $J = 7.7$  Hz, 2H), 7.25 – 7.15 (m, 3H), 5.87 (d,  $J_{\text{H-F}} = 48.1$  Hz, 1H), 2.34 (s, 3H);  $^{13}\text{C}$  NMR (101 MHz,  $\text{CDCl}_3$ )  $\delta$  167.4 (d,  $J_{\text{C-F}} = 22.1$  Hz), 140.1 (d,  $J_{\text{C-F}} = 2.3$  Hz), 139.3, 134.3, 132.5, 131.1 (d,  $J_{\text{C-F}} = 19.7$  Hz), 129.7, 126.7 (d,  $J_{\text{C-F}} = 6.4$  Hz), 125.1, 121.5, 115.9, 103.1, 91.9 (d,  $J_{\text{C-F}} = 189.7$  Hz), 21.4;  $^{19}\text{F}$  NMR (377 MHz,  $\text{CDCl}_3$ )  $\delta$  -175.33 (dd,  $J_{\text{H-F}} = 48.7$  Hz,  $J_{\text{C-F}} = 8.4$  Hz); EI-MS ( $m/z$ , relative intensity):

268 (M<sup>+</sup>, 9), 220 (1), 145 (11), 123 (100), 117 (10), 90 (15), 77 (22); HRMS (EI) calcd. for C<sub>16</sub>H<sub>13</sub>ON<sub>2</sub>F [M]<sup>+</sup> 268.1006, found: 268.1008.

### 2-((2-acetylphenyl)amino)-2-fluoro-1-(p-tolyl)ethan-1-one (3q)

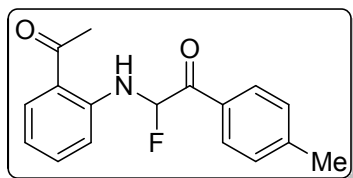

Pale yellow solid (59%, 34 mg, eluent: petroleum ether/ethyl acetate = 20/1); <sup>1</sup>H NMR (400 MHz, CDCl<sub>3</sub>) δ 12.61 (s, 1H), 8.75 (d, *J* = 8.4 Hz, 1H), 7.93 (d, *J* = 7.9 Hz, 1H), 7.55 (t, *J* = 7.8 Hz, 1H), 7.44 (d, *J* = 7.7 Hz, 2H), 7.25 – 7.14 (m, 3H), 5.84 (d, *J*<sub>H-F</sub> = 48.1 Hz, 1H), 2.69 (s, 3H), 2.35 (s, 3H); <sup>13</sup>C NMR (101 MHz, CDCl<sub>3</sub>) δ 202.7, 168.4 (d, *J*<sub>C-F</sub> = 22.0 Hz), 139.9, 139.5 (d, *J*<sub>C-F</sub> = 2.2 Hz), 135.2, 132.1 (d, *J*<sub>C-F</sub> = 20.2 Hz), 131.8, 129.5, 126.7 (d, *J*<sub>C-F</sub> = 6.4 Hz), 123.4, 122.6, 121.0, 91.9 (d, *J*<sub>C-F</sub> = 191.0 Hz), 28.6, 21.4; <sup>19</sup>F NMR (377 MHz, CDCl<sub>3</sub>) δ -176.91 (d, *J*<sub>H-F</sub> = 48.2 Hz); EI-MS (*m/z*, relative intensity): 285 (M<sup>+</sup>, 2), 222 (2), 162 (100), 144 (56), 116 (46), 91 (9), 77 (19); HRMS (EI) calcd. for C<sub>17</sub>H<sub>16</sub>O<sub>2</sub>NF [M]<sup>+</sup> 285.1160, found: 285.1157.

### 2-((2-bromo-4-methylphenyl)amino)-2-fluoro-1-(p-tolyl)ethanone (3r)

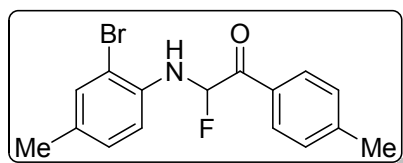

Pale yellow solid (64%, 43 mg, eluent: petroleum ether/ethyl acetate = 100/1); <sup>1</sup>H NMR (400 MHz, CDCl<sub>3</sub>) δ 8.77 (s, 1H), 8.23 (s, 1H), 7.48 – 7.40 (m, 3H), 7.27 (d, *J* = 7.7 Hz, 2H), 6.87 (d, *J* = 8.1 Hz, 1H), 5.90 (d, *J*<sub>H-F</sub> = 48.4 Hz, 1H), 2.40 (s, 3H), 2.34 (s, 3H); <sup>13</sup>C NMR (101 MHz, CDCl<sub>3</sub>) δ 166.9 (d, *J*<sub>C-F</sub> = 21.4 Hz), 139.9 (d, *J*<sub>C-F</sub> = 2.4 Hz), 138.9, 134.4, 132.0, 131.6 (d, *J*<sub>C-F</sub> = 19.5 Hz), 129.6, 126.9, 126.8, 122.5, 110.7, 92.1 (d, *J*<sub>C-F</sub> = 189.6 Hz), 21.4, 21.4; <sup>19</sup>F NMR (377 MHz, CDCl<sub>3</sub>) δ -174.39 (dd, *J*<sub>H-F</sub> = 49.1 Hz, *J*<sub>C-F</sub> = 7.4 Hz); EI-MS (*m/z*, relative intensity): 335 (M<sup>+</sup>, 7), 256 (40), 236 (40), 184 (21), 123 (100), 109 (31), 90 (12), 77 (59); HRMS (EI) calcd. for C<sub>16</sub>H<sub>15</sub>ONBrF [M]<sup>+</sup> 335.0316, found: 335.0318.

### 2-((2,4-dichlorophenyl)amino)-2-fluoro-1-(p-tolyl)ethan-1-one (3s)

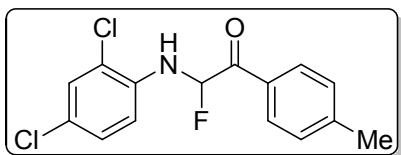

Pale yellow solid (61%, 38 mg, eluent: petroleum ether/ethyl acetate = 20/1);  $^1\text{H}$  NMR (400 MHz,  $\text{CDCl}_3$ )  $\delta$  8.76 (s, 1H), 8.38 (d,  $J = 8.7$  Hz, 1H), 7.50 – 7.38 (m, 3H), 7.27 (d,  $J = 6.1$  Hz, 3H), 5.91 (d,  $J_{\text{H-F}} = 48.3$  Hz, 1H), 2.40 (s, 3H);  $^{13}\text{C}$  NMR (101 MHz,  $\text{CDCl}_3$ )  $\delta$  166.9 (d,  $J_{\text{C-F}} = 21.6$  Hz), 140.1 (d,  $J_{\text{C-F}} = 2.5$  Hz), 132.5, 131.3 (d,  $J_{\text{C-F}} = 19.5$  Hz), 130.1, 129.7, 129.0, 128.1, 126.8 (d,  $J_{\text{C-F}} = 6.2$  Hz), 124.1, 122.4, 92.1 (d,  $J_{\text{C-F}} = 189.4$  Hz), 21.4;  $^{19}\text{F}$  NMR (377 MHz,  $\text{CDCl}_3$ )  $\delta$  -174.55 (dd,  $J_{\text{H-F}} = 48.9$  Hz,  $J_{\text{C-F}} = 7.8$  Hz); EI-MS ( $m/z$ , relative intensity): 311 ( $\text{M}^+$ , 8), 256 (1), 221 (2), 160 (14), 123 (100), 103 (22), 91 (7), 77 (25); HRMS (EI) calcd. for  $\text{C}_{15}\text{H}_{12}\text{ONCl}_2\text{F}$  [ $\text{M}$ ] $^+$  311.0274, found: 311.0273.

### 2-fluoro-2-((2-iodo-4-(trifluoromethyl)phenyl)amino)-1-(p-tolyl)ethan-1-one (3t)

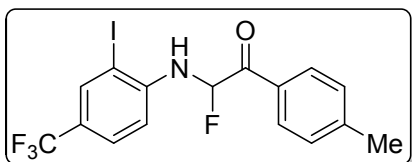

Pale yellow solid (69%, 60 mg, eluent: petroleum ether/ethyl acetate = 200/1);  $^1\text{H}$  NMR (400 MHz,  $\text{CDCl}_3$ )  $\delta$  8.78 (d,  $J = 5.2$  Hz, 1H), 8.45 (d,  $J = 8.6$  Hz, 1H), 8.06 (s, 1H), 7.61 (d,  $J = 8.6$  Hz, 1H), 7.42 (d,  $J = 7.7$  Hz, 2H), 7.25 (d,  $J = 7.5$  Hz, 2H), 5.91 (d,  $J_{\text{H-F}} = 48.2$  Hz, 1H), 2.38 (s, 3H);  $^{13}\text{C}$  NMR (101 MHz,  $\text{CDCl}_3$ )  $\delta$  167.3 (d,  $J_{\text{C-F}} = 21.9$  Hz), 140.4, 140.2 (d,  $J_{\text{C-F}} = 2.6$  Hz), 136.0 (q,  $J_{\text{C-F}} = 3.8$  Hz), 131.1 (d,  $J_{\text{C-F}} = 19.6$  Hz), 129.8, 128.2 (q,  $J_{\text{C-F}} = 33.3$  Hz), 126.8 (d,  $J_{\text{C-F}} = 6.2$  Hz), 126.7 (q,  $J_{\text{C-F}} = 3.2$  Hz), 122.9 (q,  $J_{\text{C-F}} = 272.4$  Hz), 121.0, 92.1 (d,  $J_{\text{C-F}} = 189.7$  Hz), 89.0, 21.4;  $^{19}\text{F}$  NMR (377 MHz,  $\text{DMSO-}d_6$ )  $\delta$  -62.33 (s, 3F), -174.63 (dd,  $J_{\text{H-F}} = 48.8$  Hz,  $J_{\text{C-F}} = 8.1$  Hz, 1F); EI-MS ( $m/z$ , relative intensity): 437 ( $\text{M}^+$ , 3), 370 (2), 187 (16), 144 (5), 123 (100), 103 (16), 91 (7), 77 (18); HRMS (EI) calcd. for  $\text{C}_{16}\text{H}_{12}\text{ONFI}$  [ $\text{M}$ ] $^+$  436.9894, found: 436.9890.

### 2-fluoro-2-(phenylamino)-1-(p-tolyl)ethan-1-one (3u)

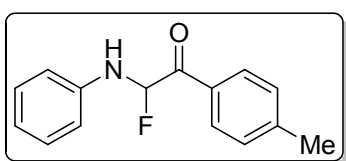

Pale yellow solid (41%, 20 mg, eluent: petroleum ether/ethyl acetate = 20/1);  $^1\text{H}$  NMR (400 MHz,  $\text{CDCl}_3$ )  $\delta$  8.18 (s, 1H), 7.60 (d,  $J = 7.9$  Hz, 2H), 7.43 – 7.32 (m,

4H), 7.23 (d,  $J = 7.8$  Hz, 2H), 7.16 (t,  $J = 7.4$  Hz, 1H), 5.86 (d,  $J_{\text{H-F}} = 48.7$  Hz, 1H), 2.37 (s, 3H);  $^{13}\text{C}$  NMR (101 MHz,  $\text{CDCl}_3$ )  $\delta$  166.8 (d,  $J_{\text{C-F}} = 21.0$  Hz), 139.9 (d,  $J_{\text{C-F}} = 2.7$  Hz), 136.8, 131.7 (d,  $J_{\text{C-F}} = 19.3$  Hz), 129.6, 129.3, 127.0 (d,  $J_{\text{C-F}} = 6.2$  Hz), 125.2, 120.2, 92.1 (d,  $J_{\text{C-F}} = 188.8$  Hz), 21.4;  $^{19}\text{F}$  NMR (377 MHz,  $\text{CDCl}_3$ )  $\delta$  -172.97 (dd,  $J_{\text{H-F}} = 48.6$  Hz,  $J_{\text{C-F}} = 5.7$  Hz); EI-MS ( $m/z$ , relative intensity): 243 ( $\text{M}^+$ , 25), 195 (7), 149 (44), 123 (100), 109 (49), 92 (52), 77 (93); HRMS (EI) calcd. for  $\text{C}_{15}\text{H}_{14}\text{ONF}$  [ $\text{M}$ ] $^+$  243.1054, found: 243.1056.

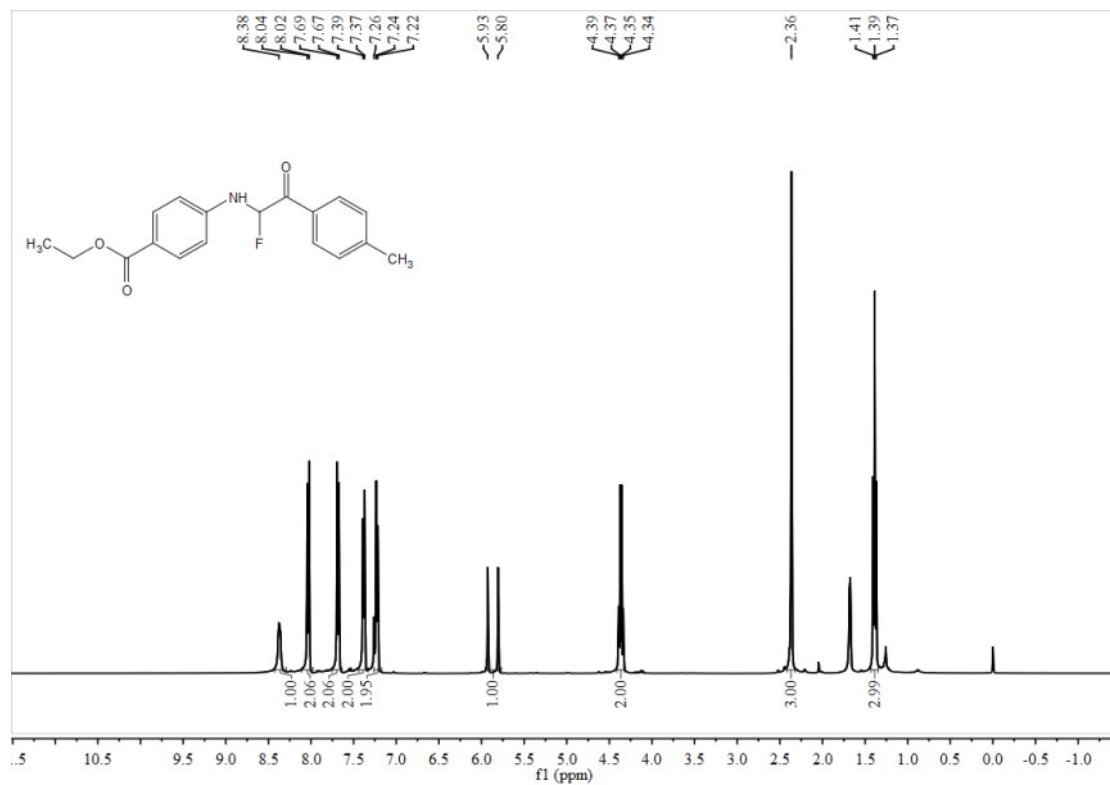

<sup>1</sup>H NMR of **3a**

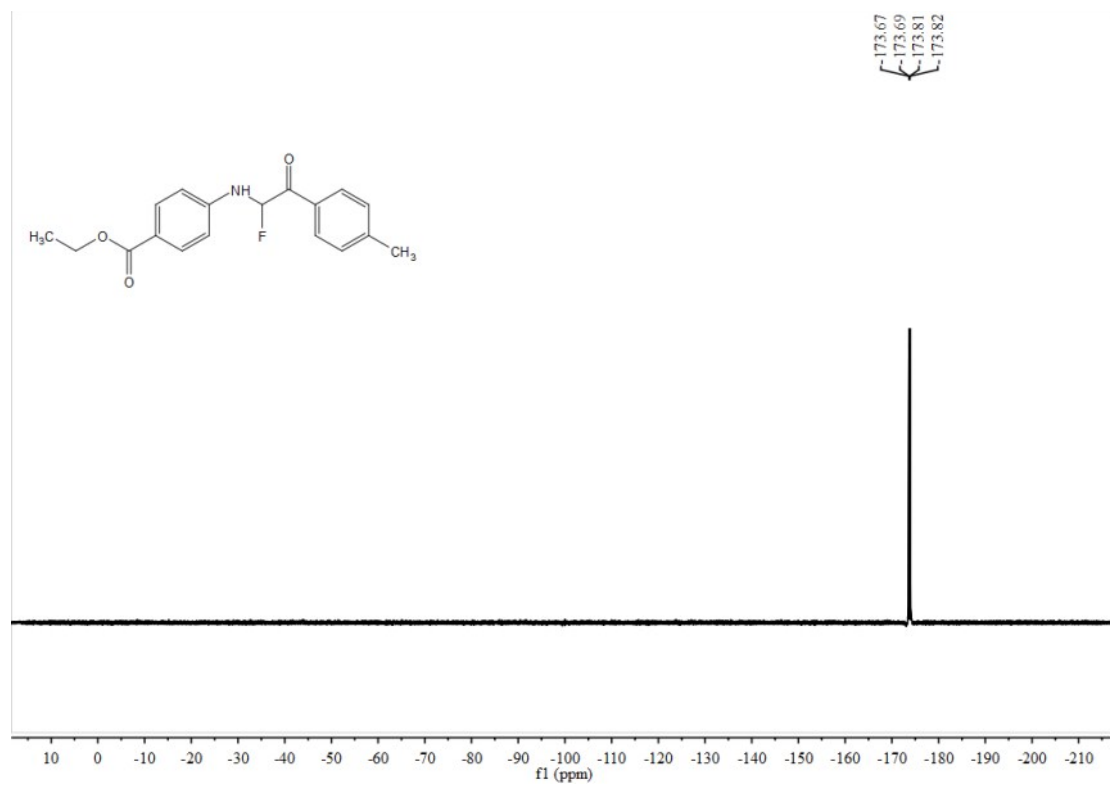

<sup>19</sup>F NMR of **3a**

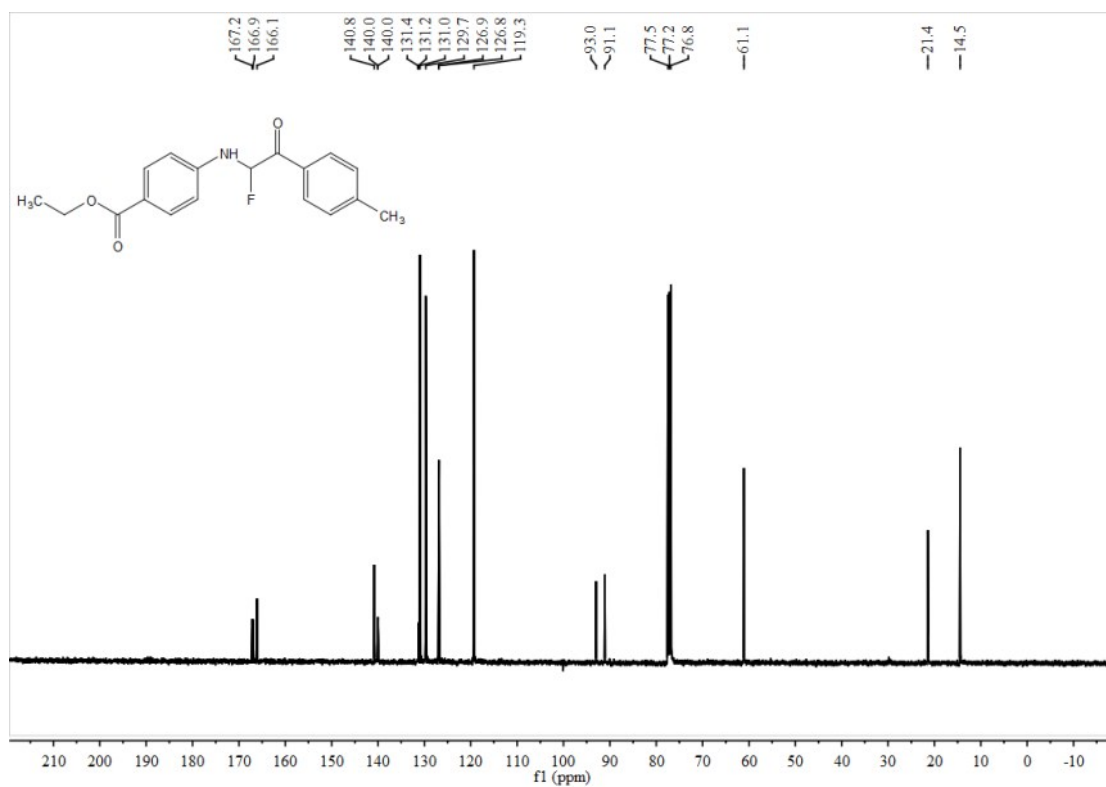

$^{13}\text{C}$  NMR of **3a**

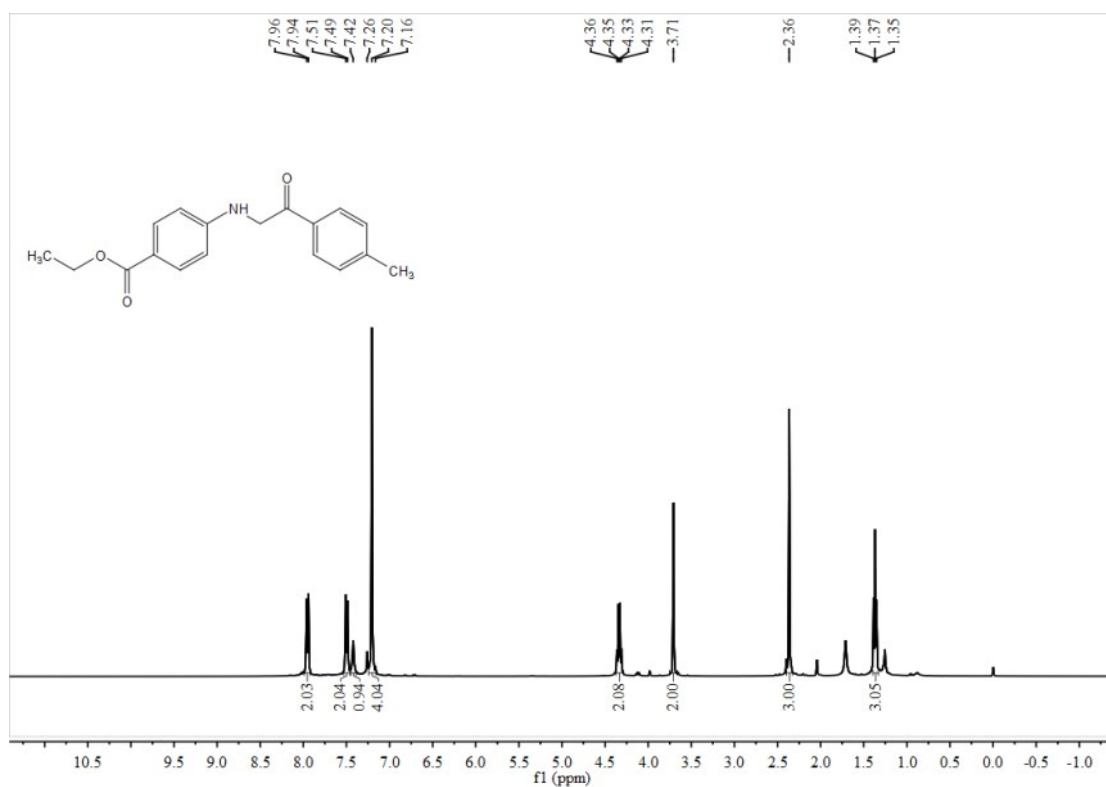

$^1\text{H}$  NMR of **4a**

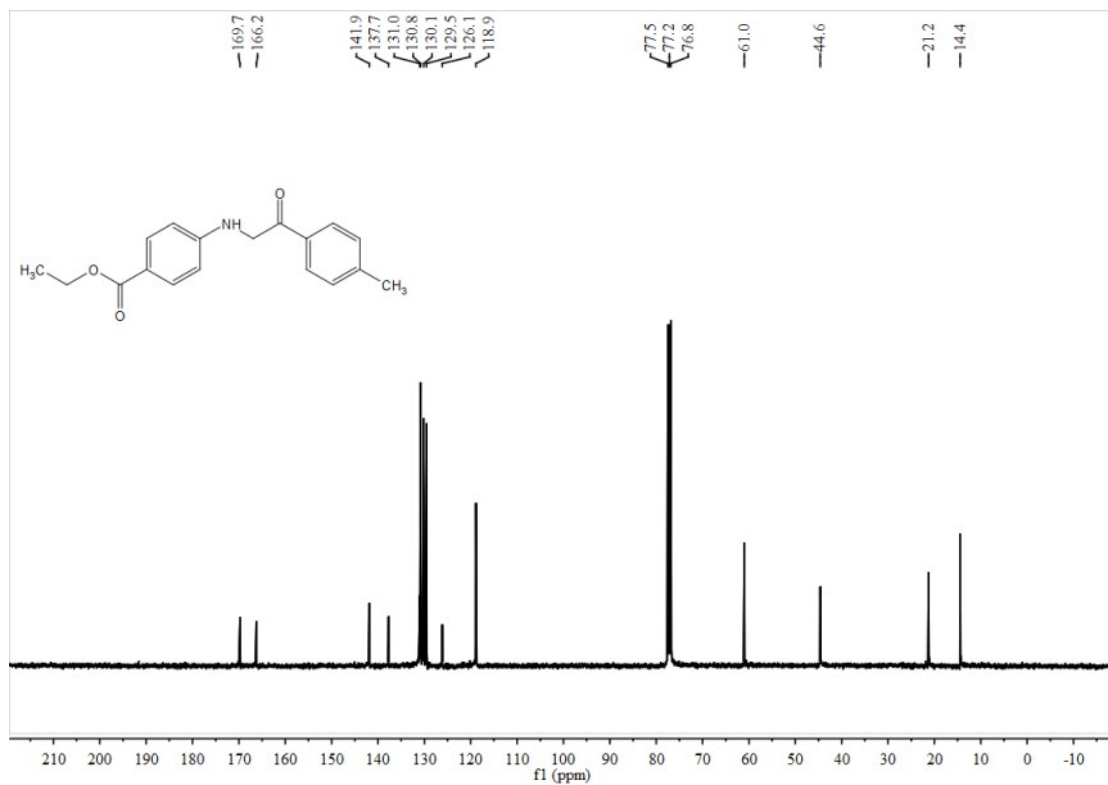

$^{13}\text{C}$  NMR of **4a**

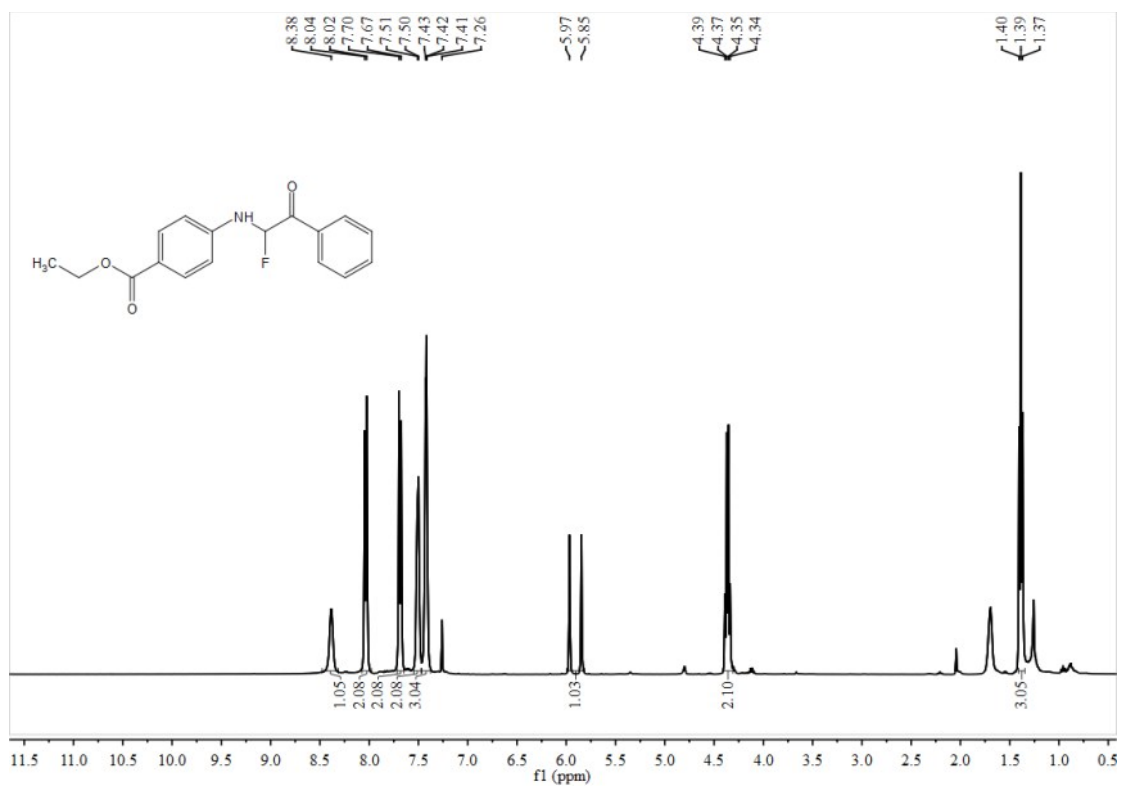

$^1\text{H}$  NMR of **3b**

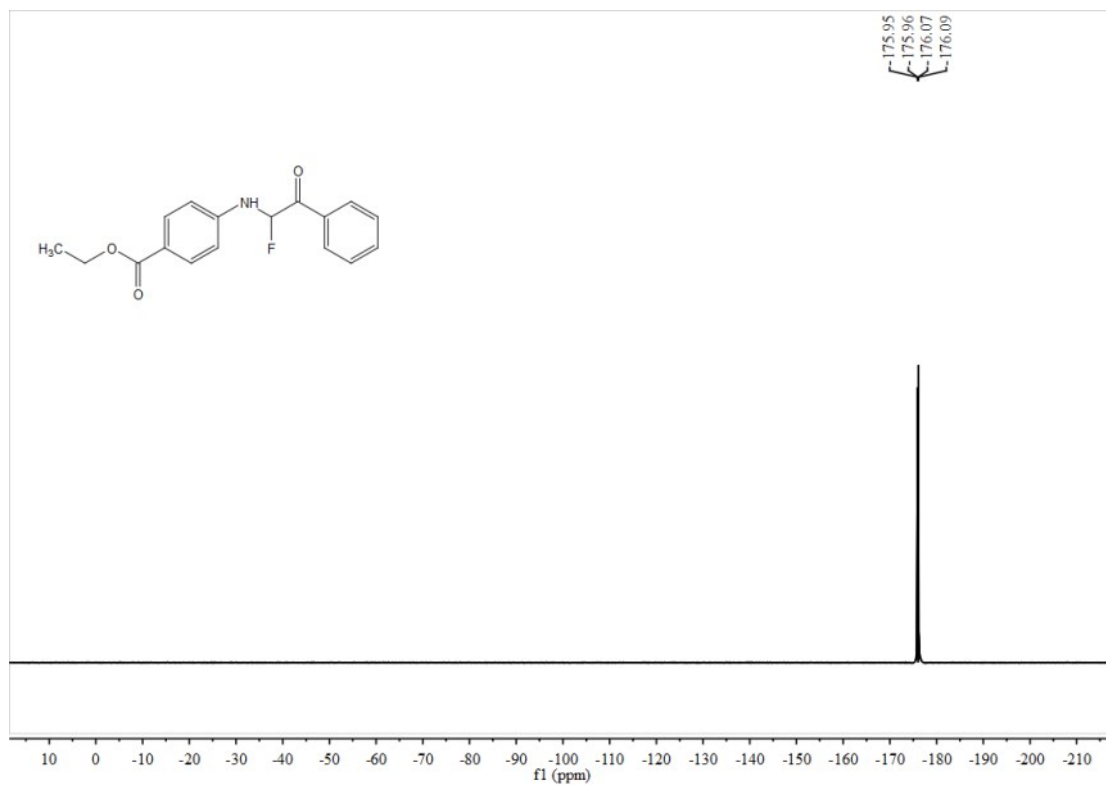

$^{19}\text{F}$  NMR of **3b**

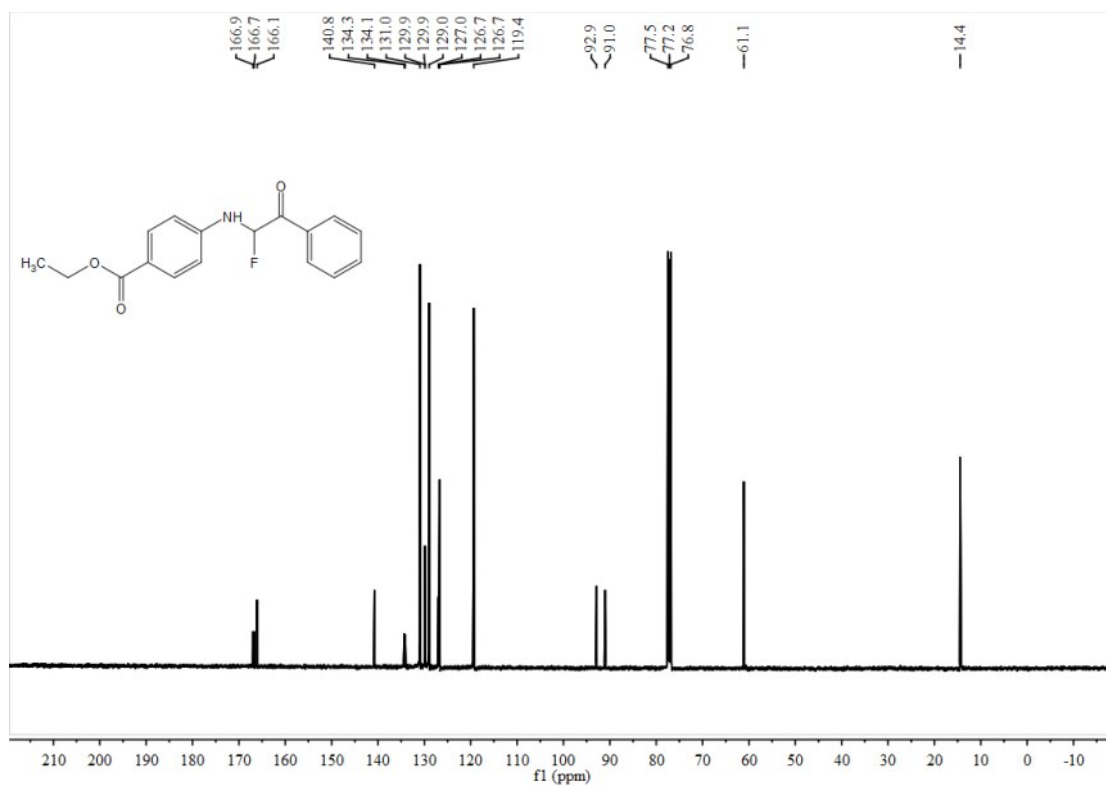

$^{13}\text{C}$  NMR of **3b**



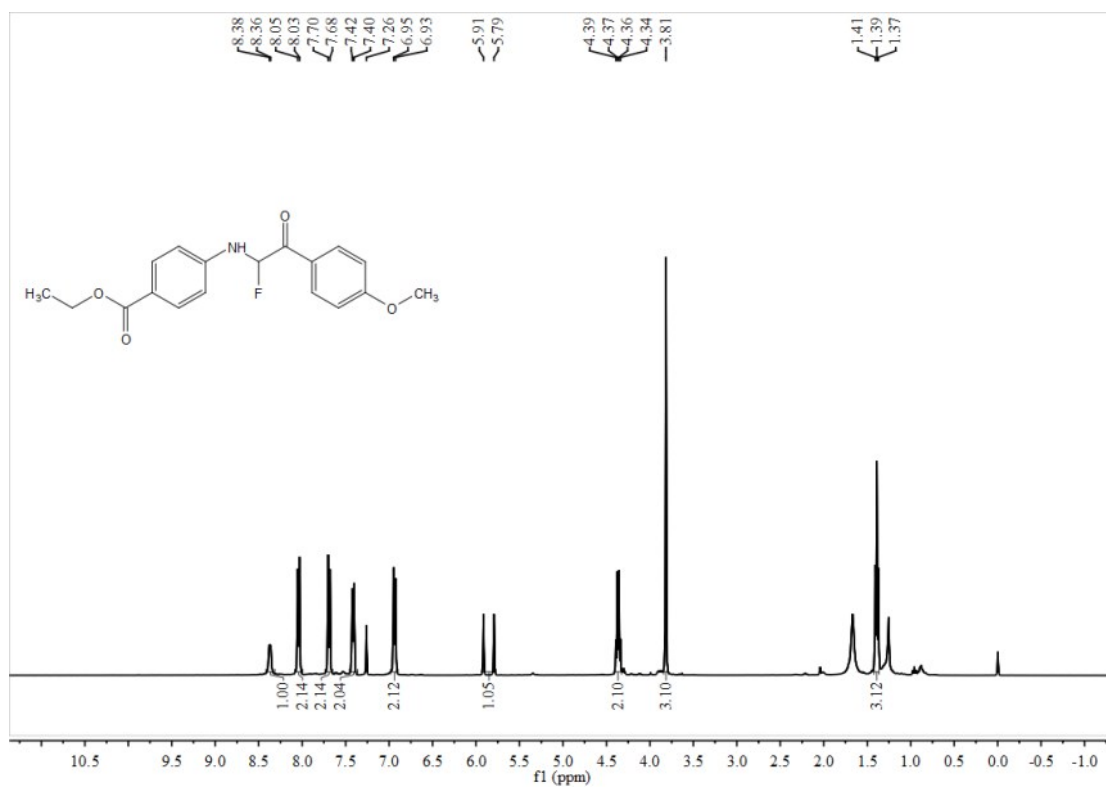

<sup>1</sup>H NMR of **3c**

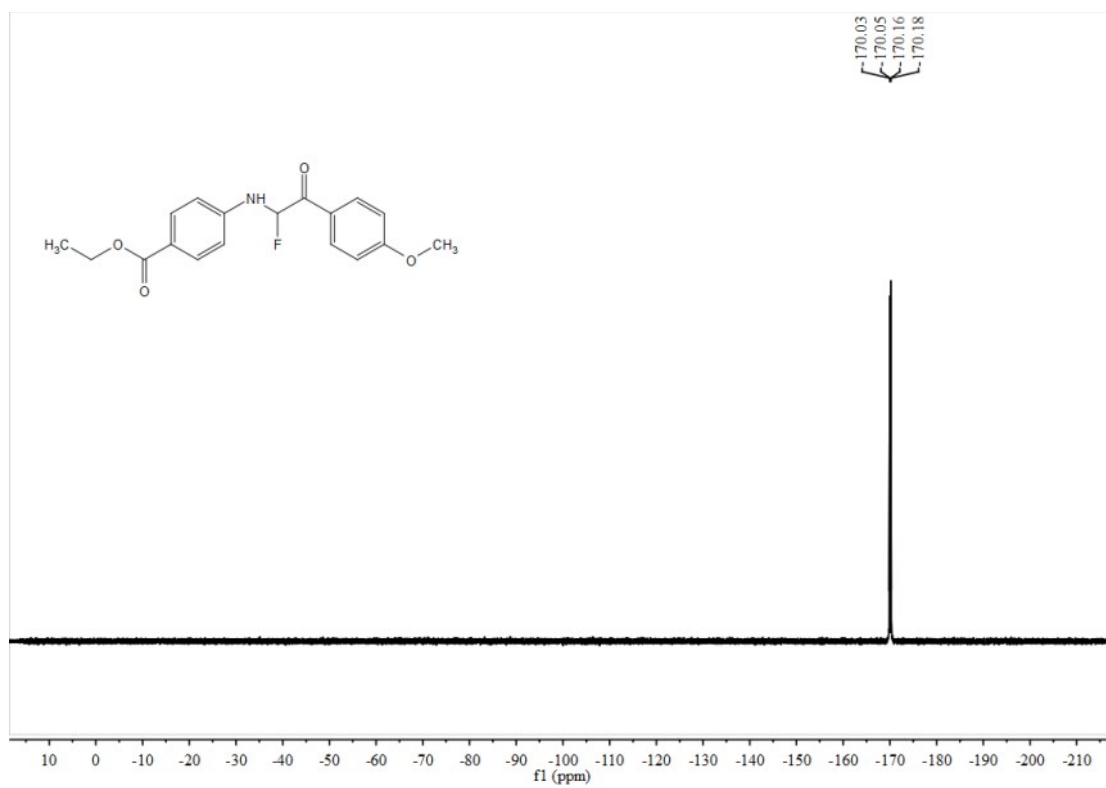

<sup>19</sup>F NMR of **3c**

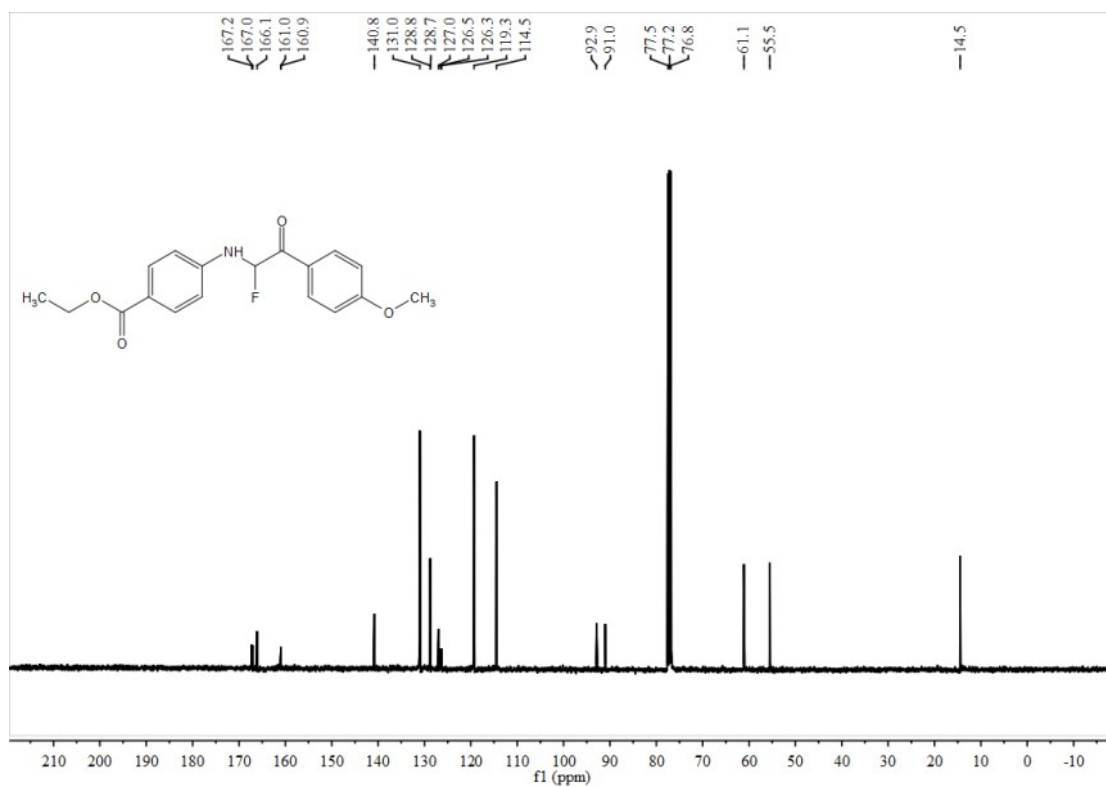

$^{13}\text{C}$  NMR of **3c**

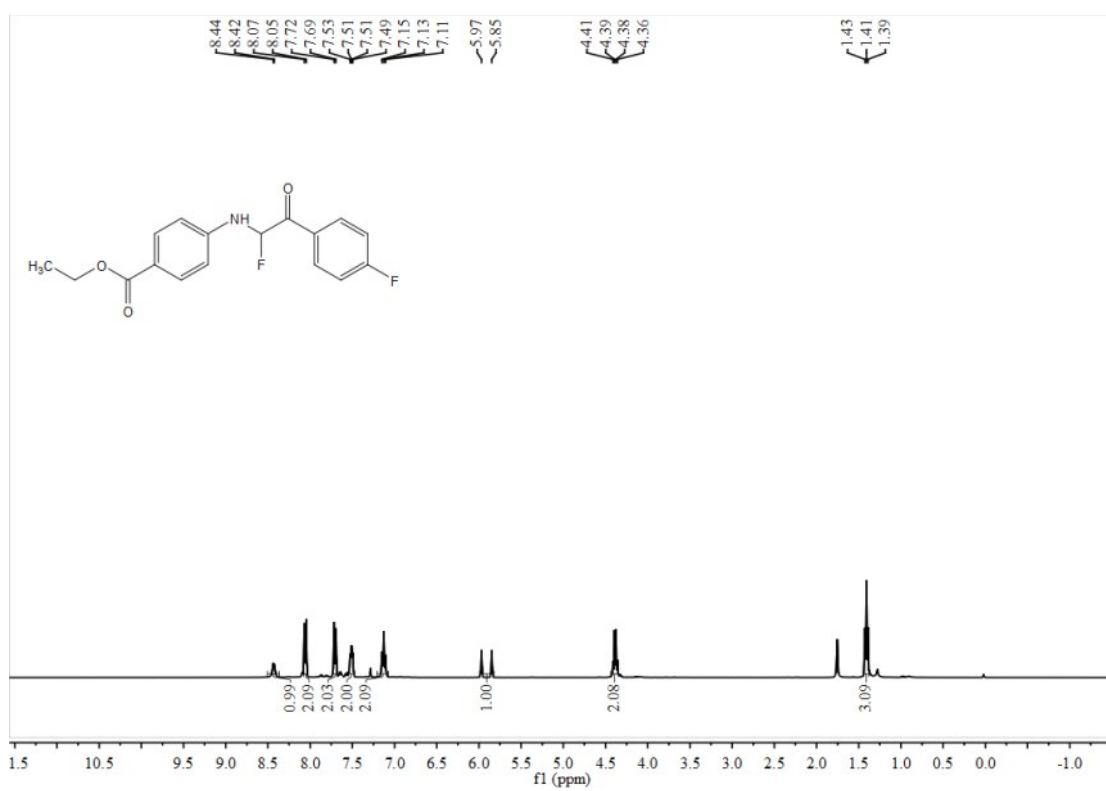

$^1\text{H}$  NMR of **3d**

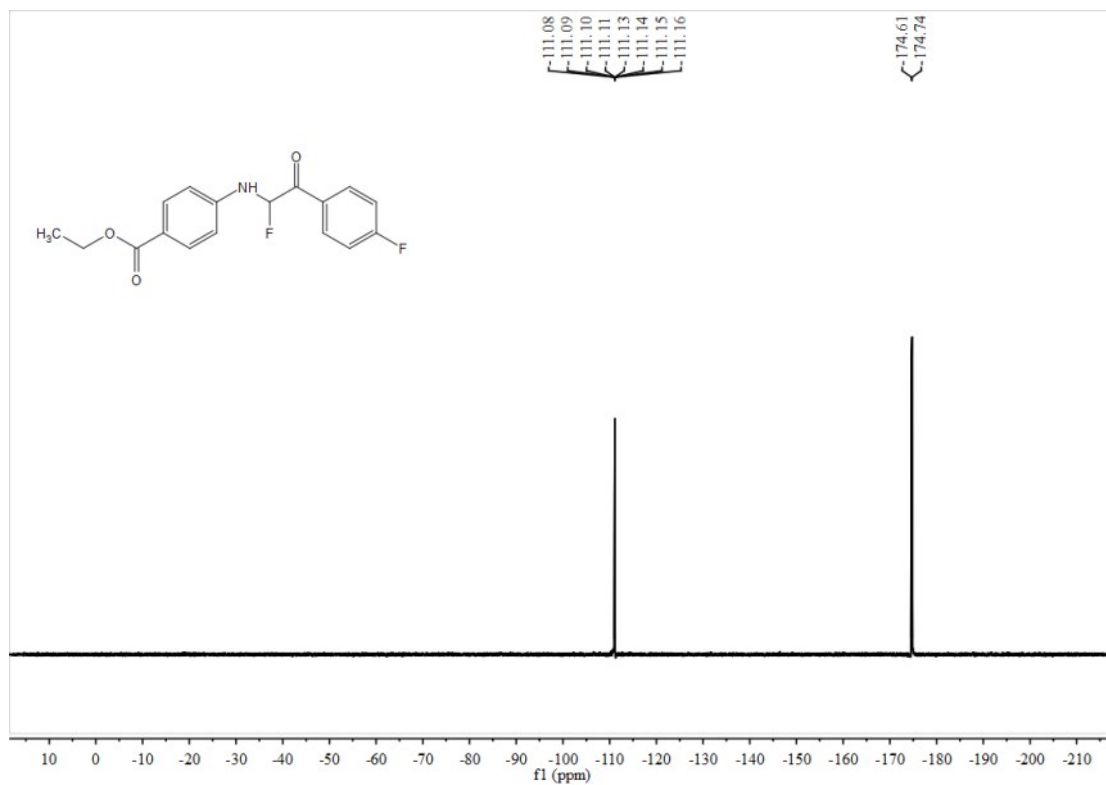

<sup>19</sup>F NMR of **3d**

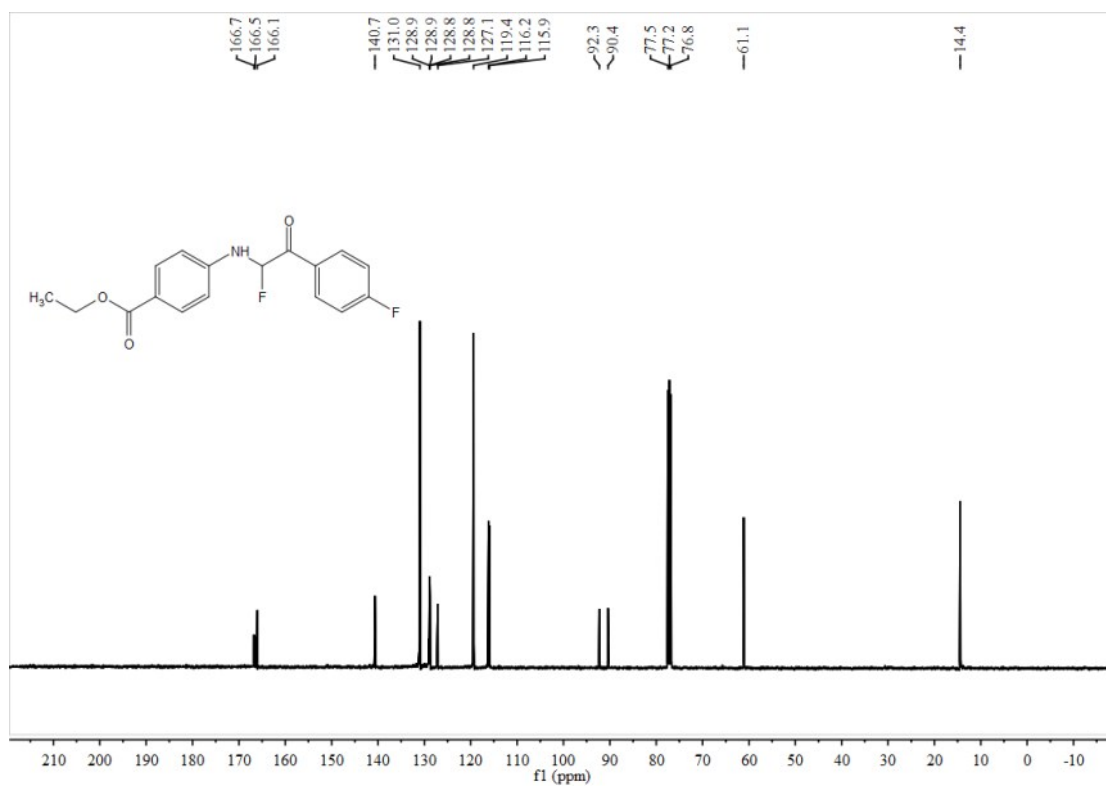

<sup>13</sup>C NMR of **3d**

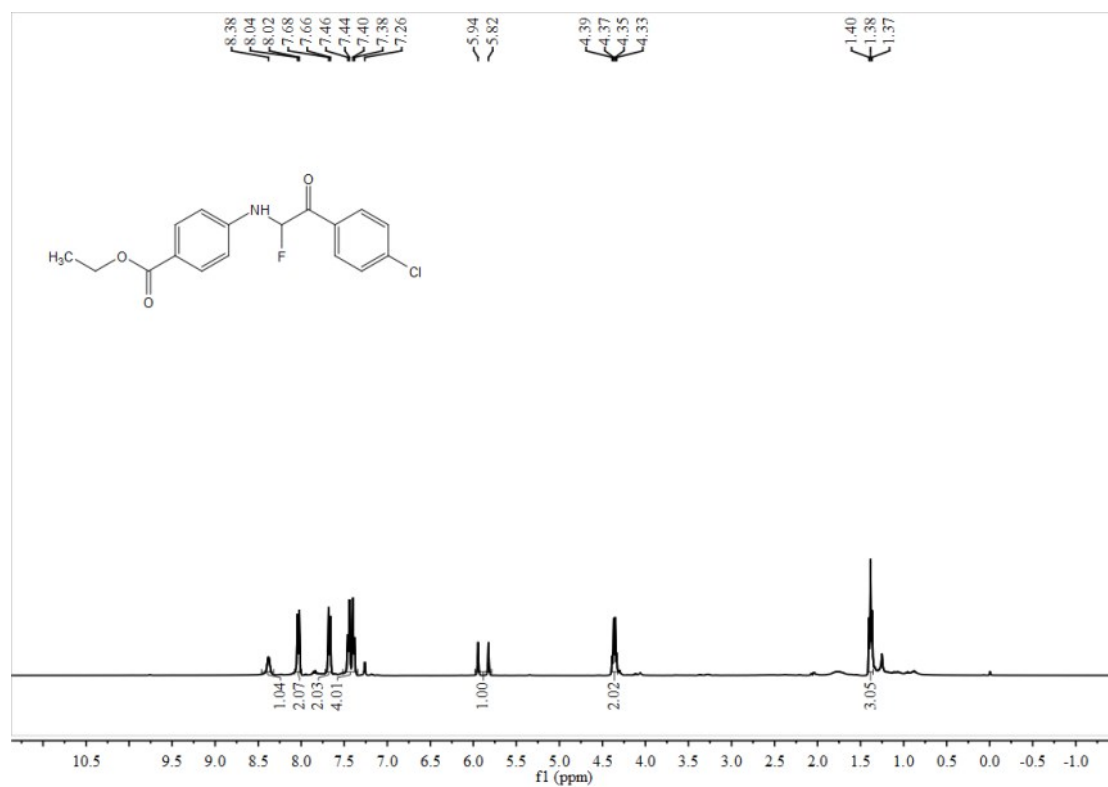

<sup>1</sup>H NMR of **3e**

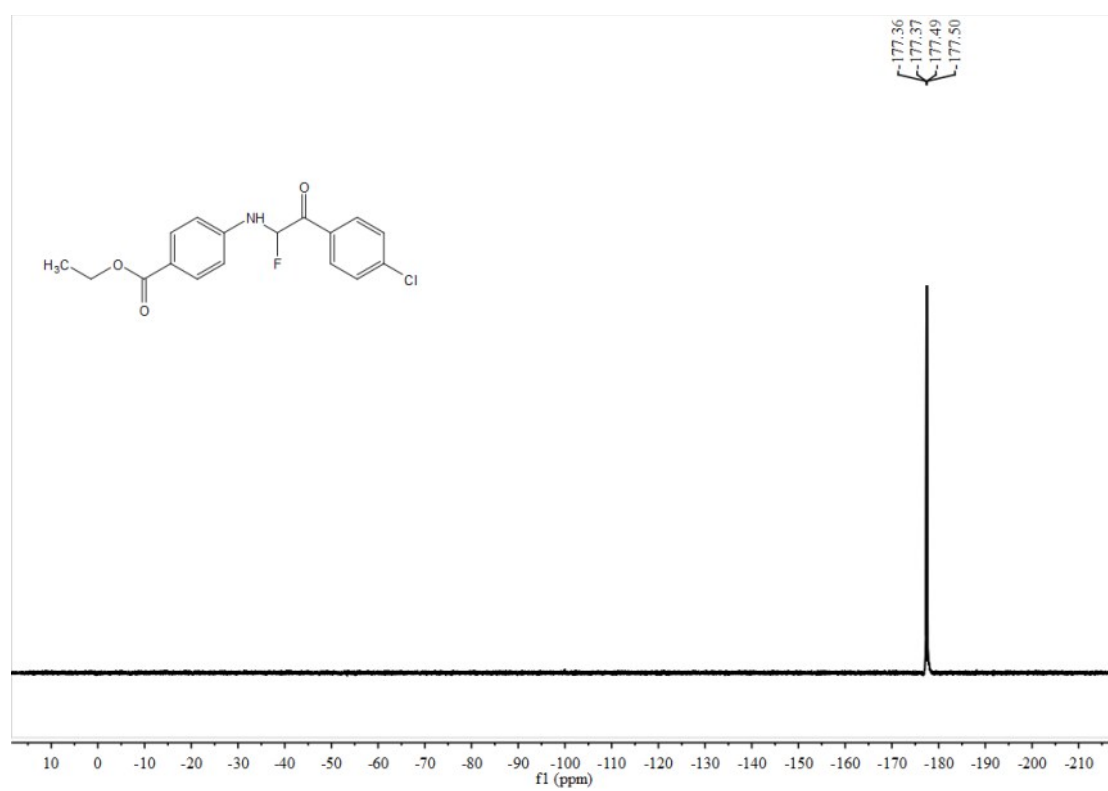

<sup>19</sup>F NMR of **3e**

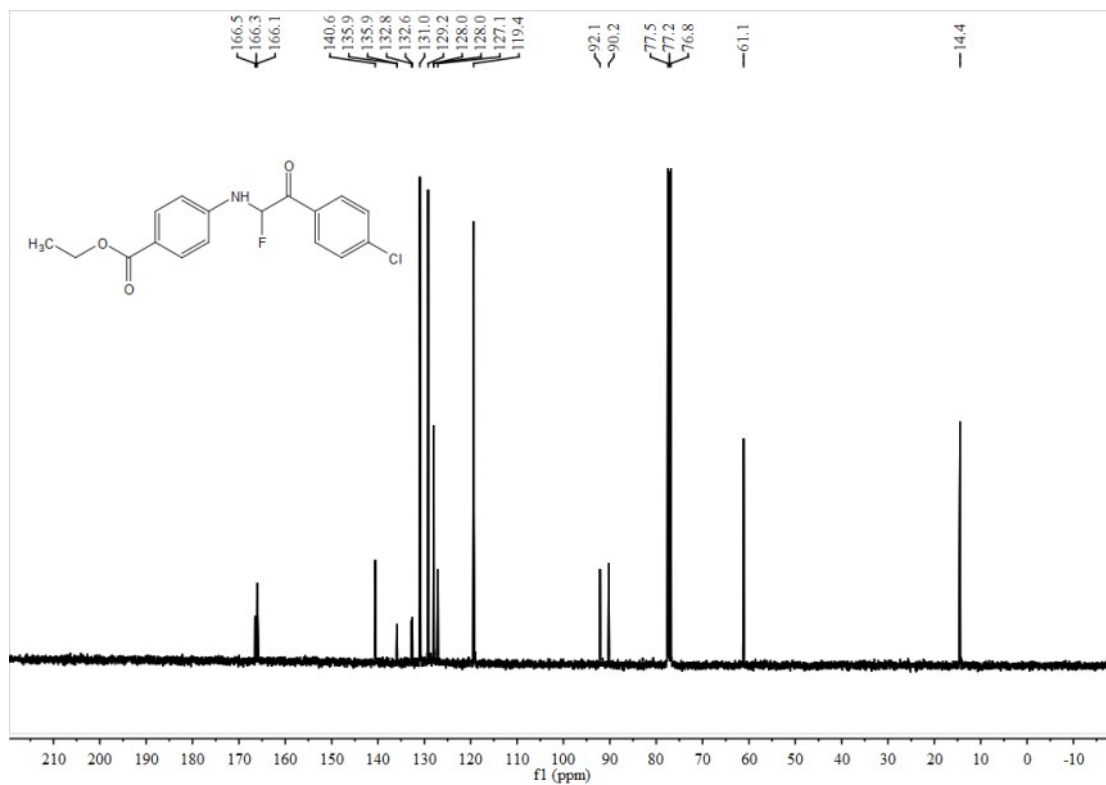

$^{13}\text{C}$  NMR of **3e**

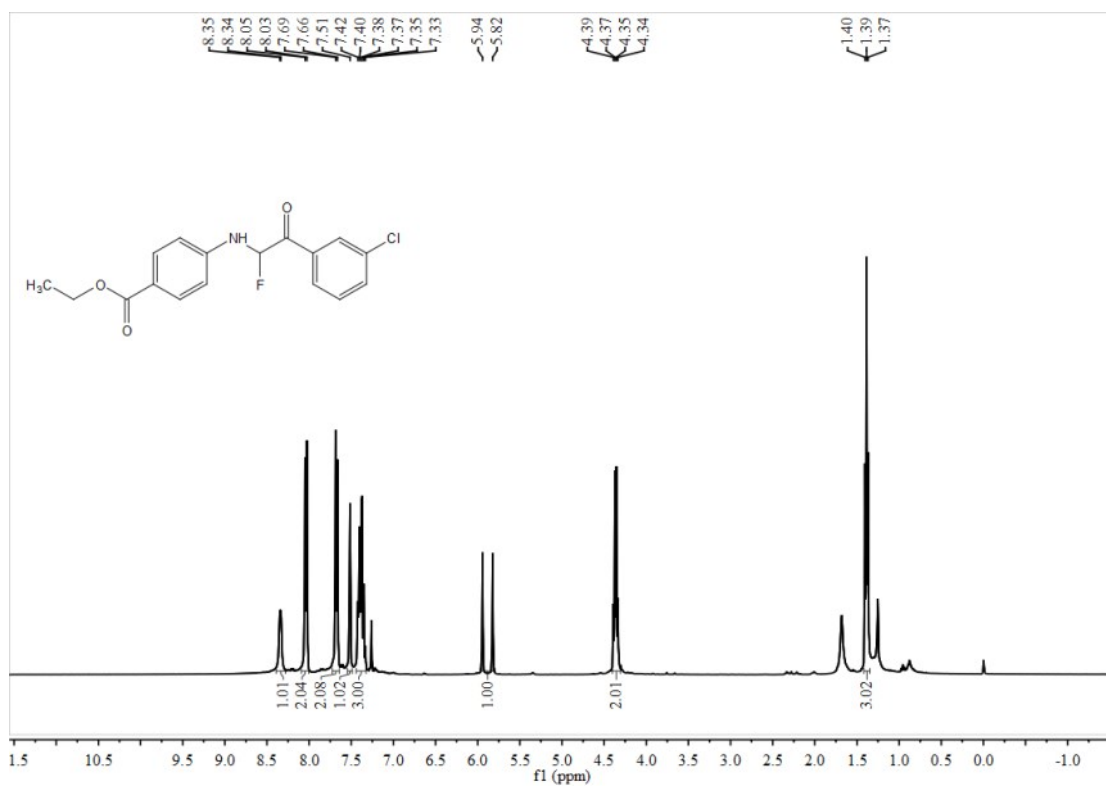

$^1\text{H}$  NMR of **3f**

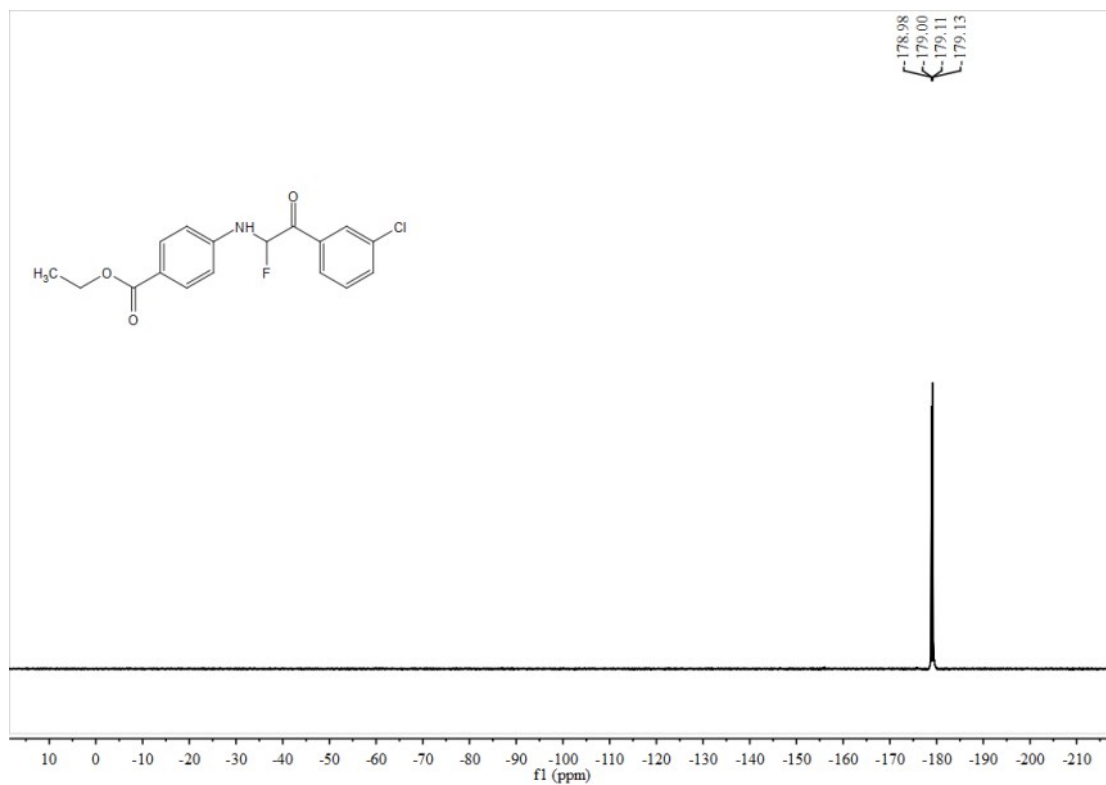

$^{19}\text{F}$  NMR of **3f**

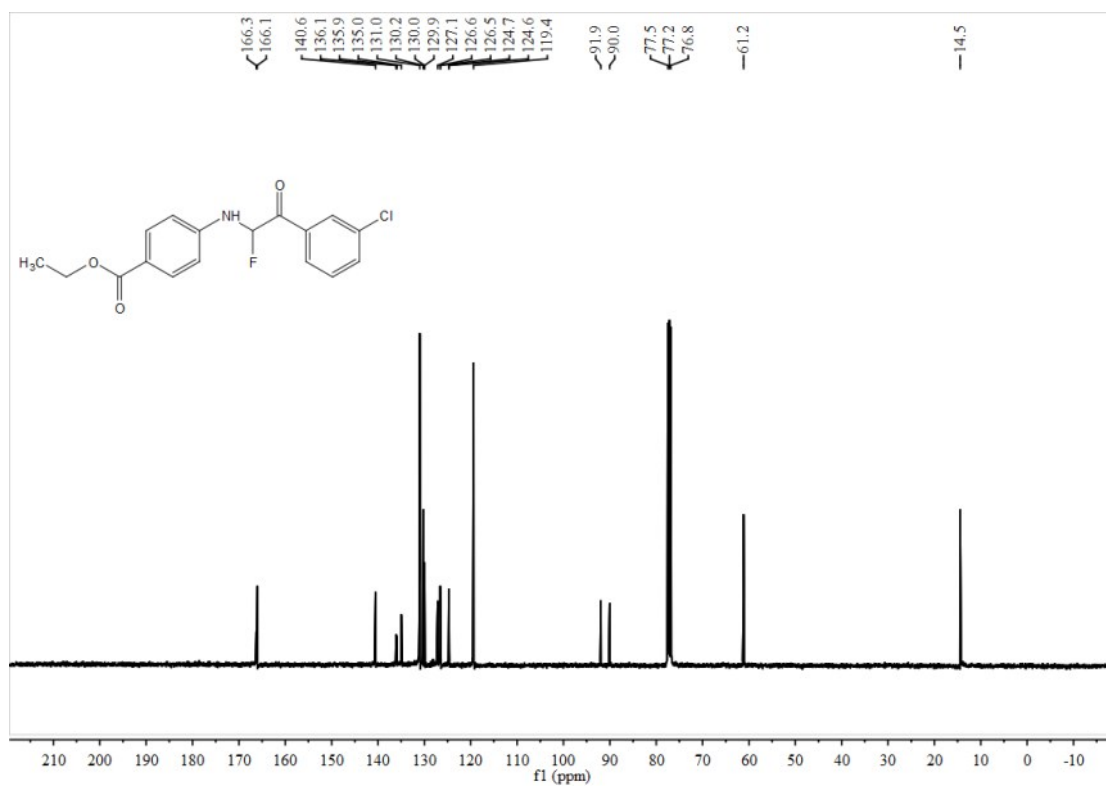

$^{13}\text{C}$  NMR of **3f**

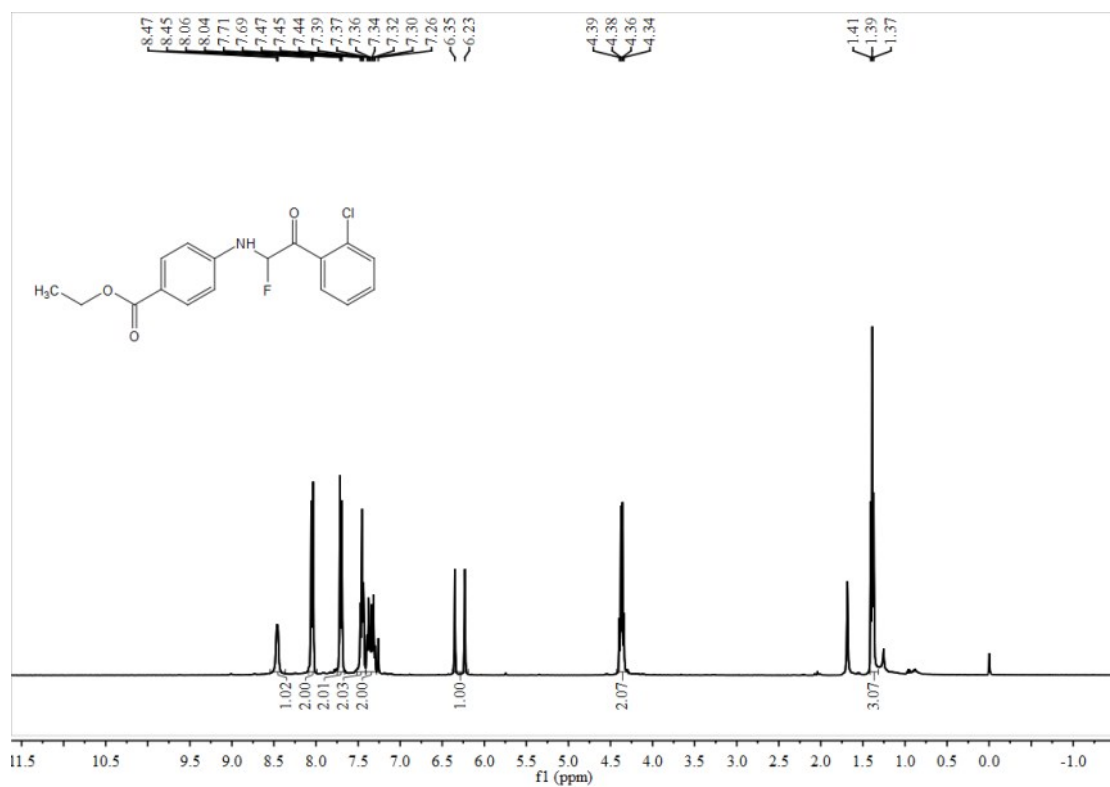

<sup>1</sup>H NMR of 3g

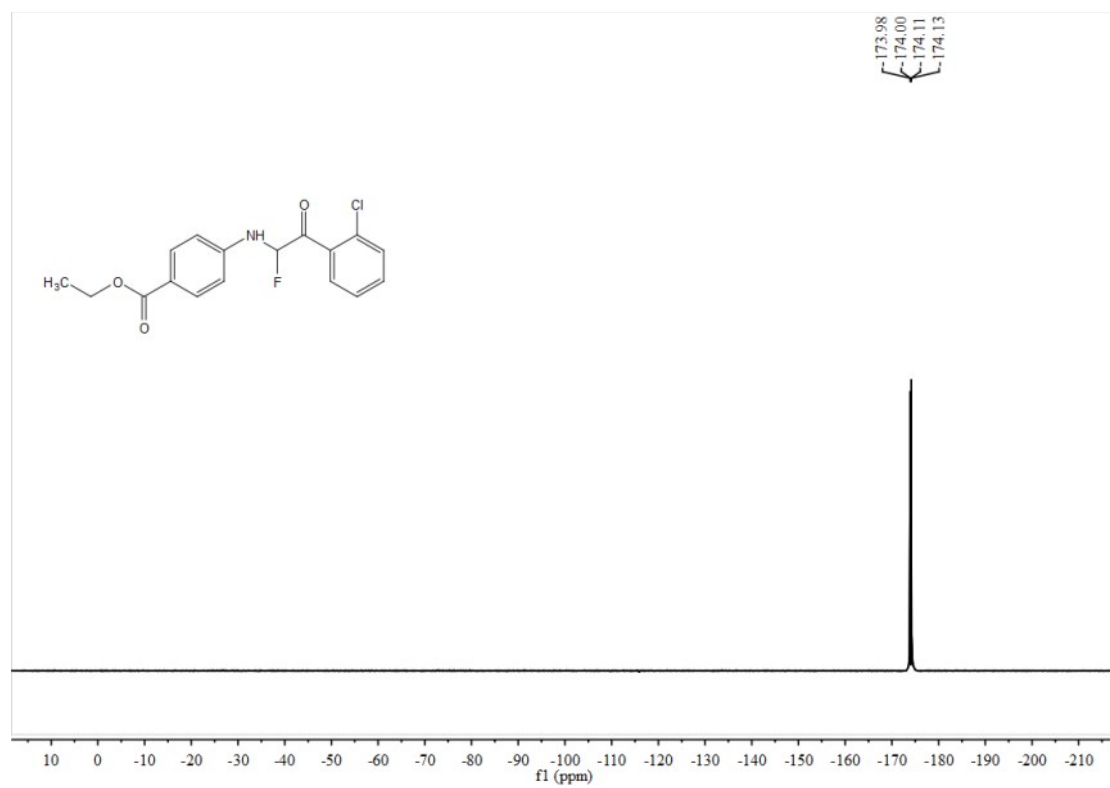

<sup>19</sup>F NMR of 3g

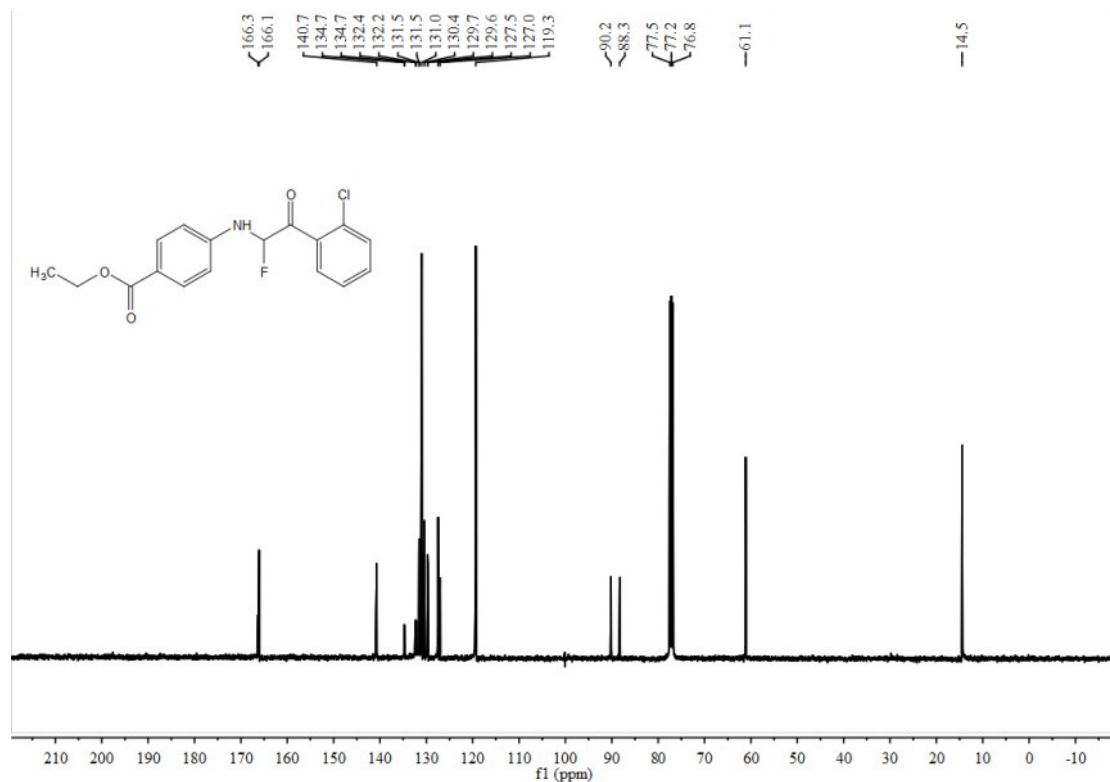

$^{13}\text{C}$  NMR of **3g**

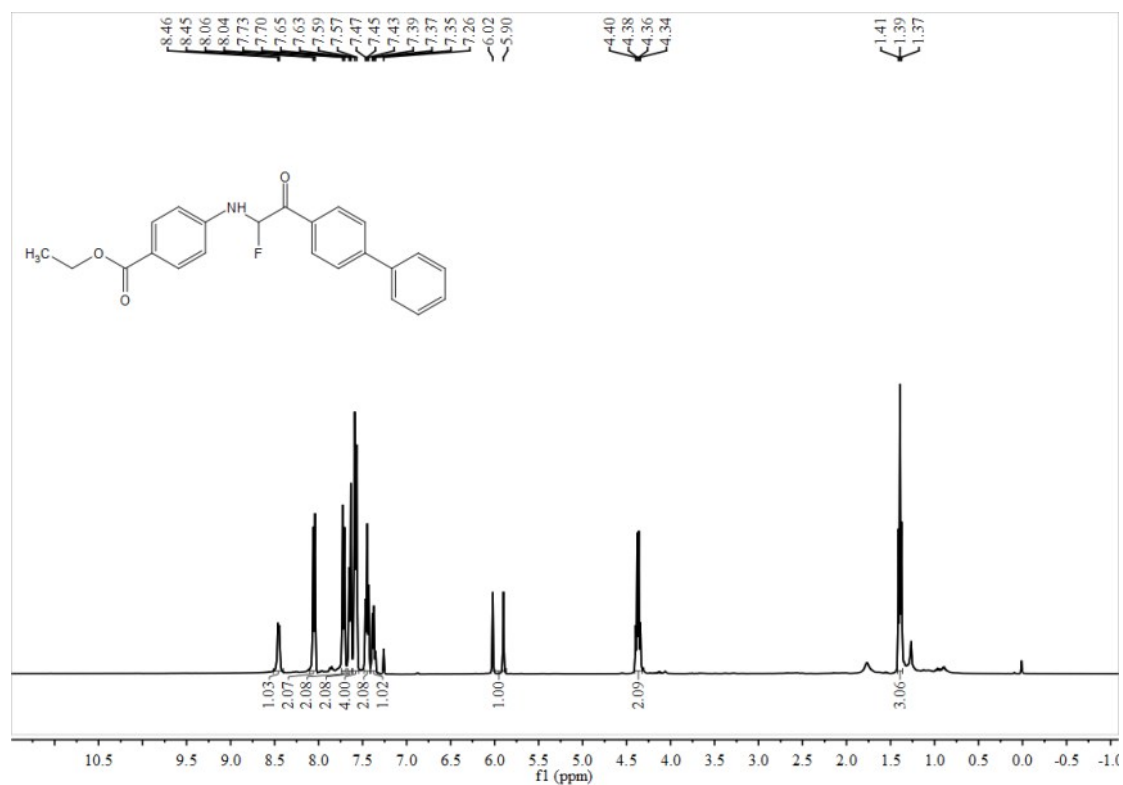

$^1\text{H}$  NMR of **3h**



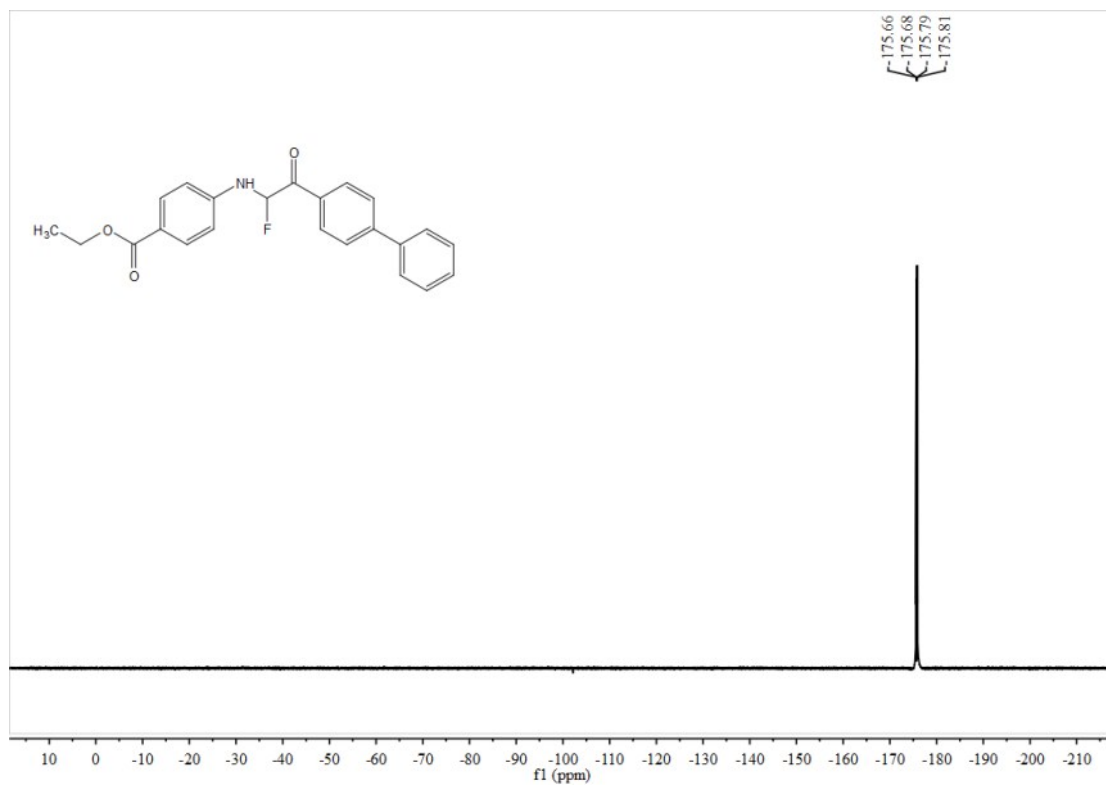

$^{19}\text{F}$  NMR of **3h**

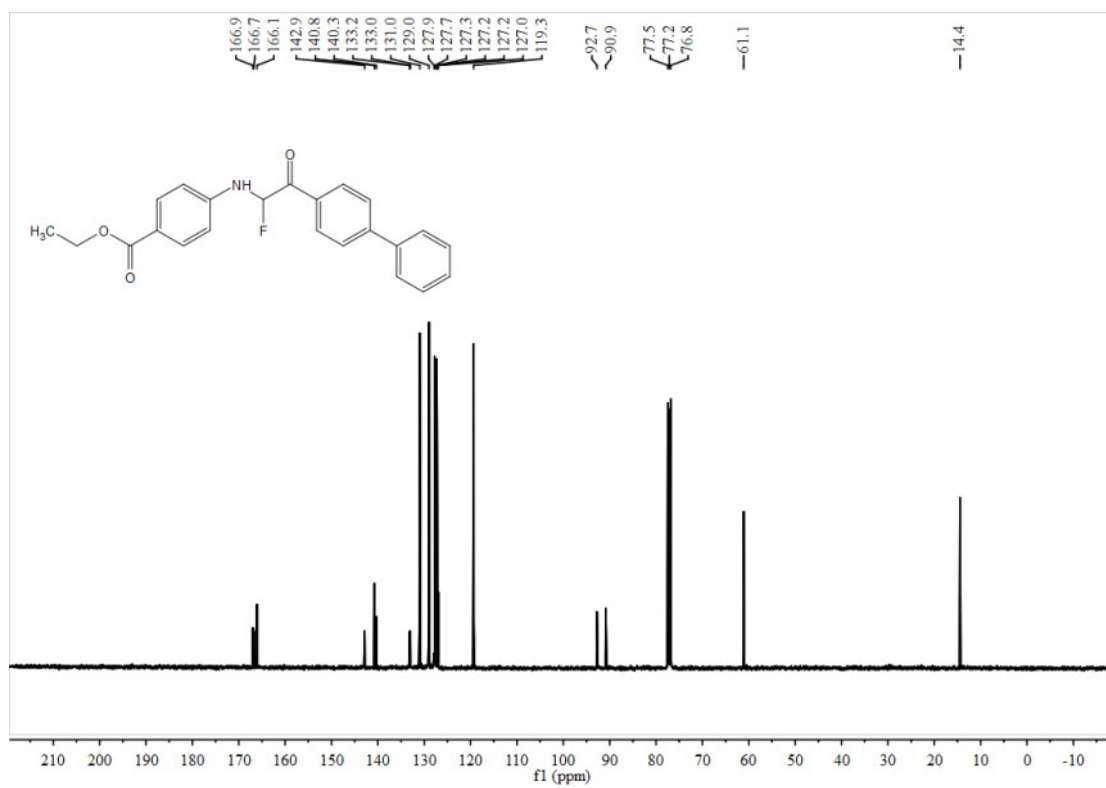

$^{13}\text{C}$  NMR of **3h**

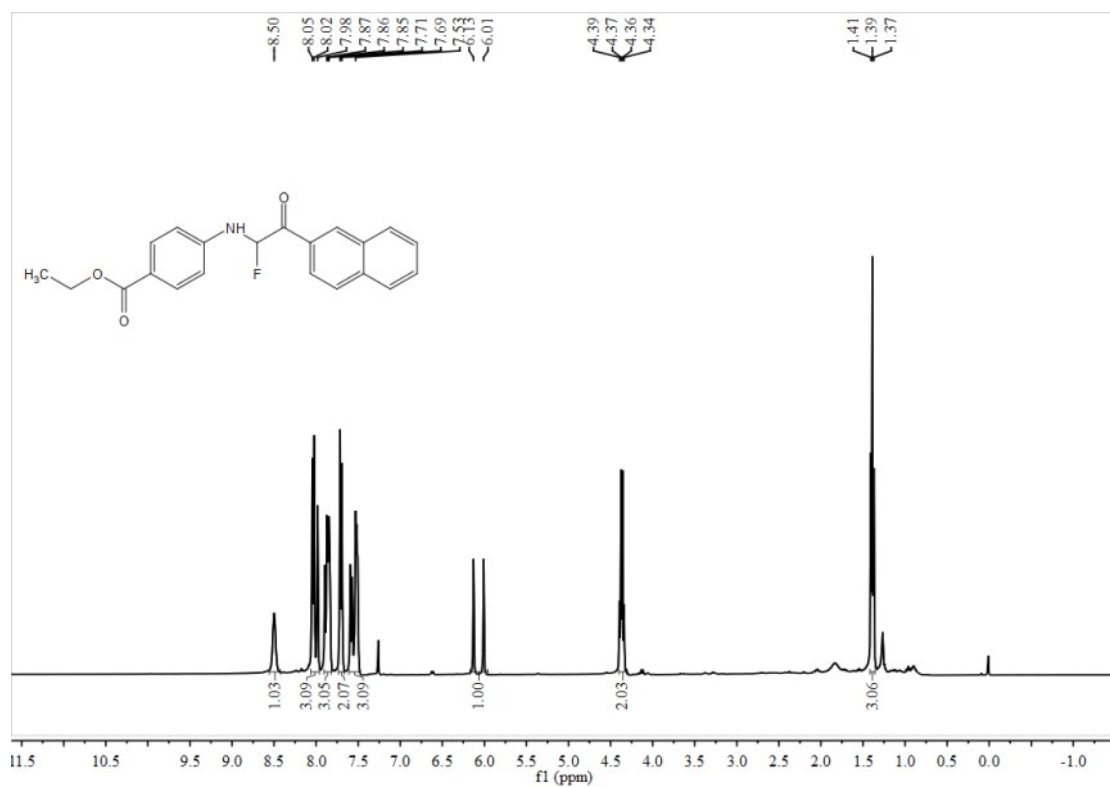

<sup>1</sup>H NMR of **3i**

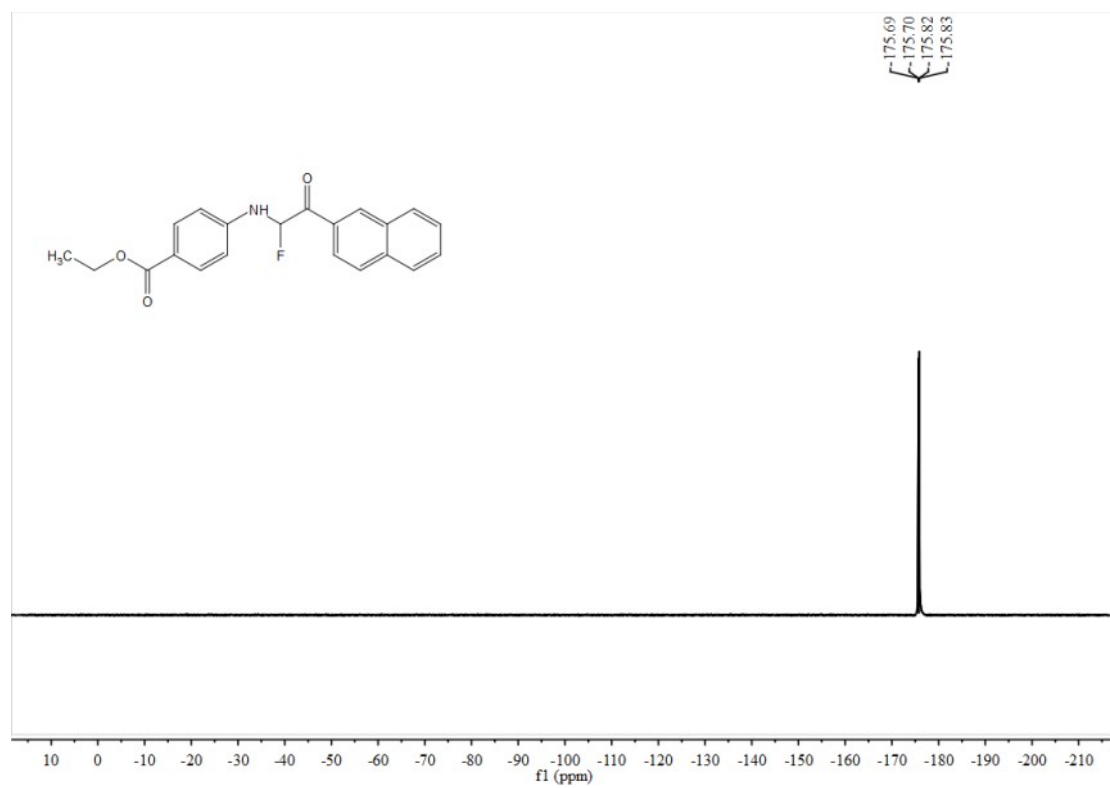

<sup>19</sup>F NMR of **3i**

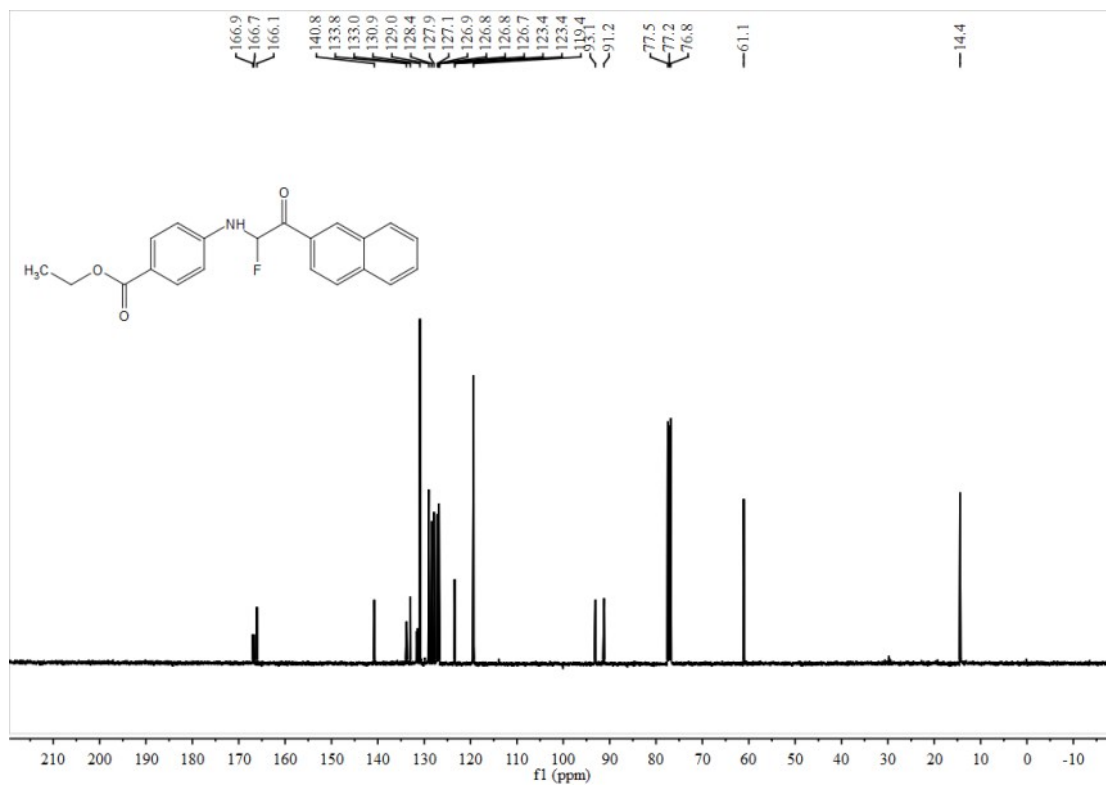

<sup>13</sup>C NMR of **3i**

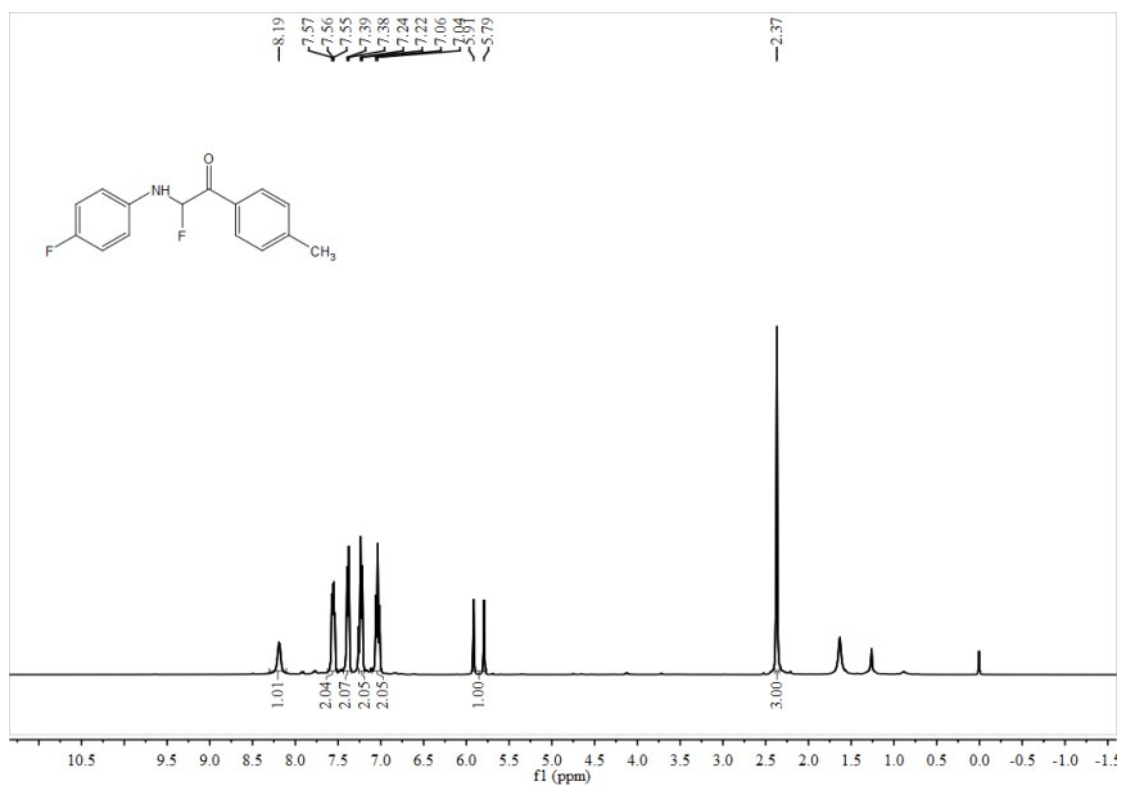

<sup>1</sup>H NMR of **3j**

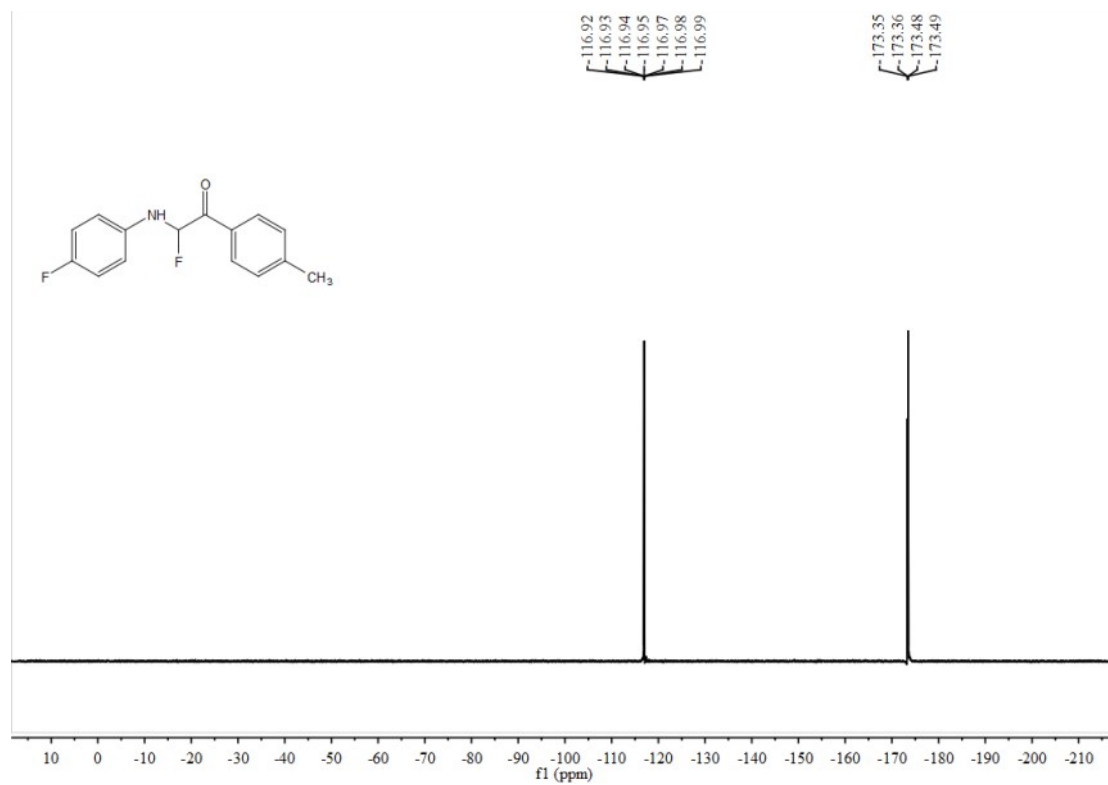

<sup>19</sup>F NMR of **3j**

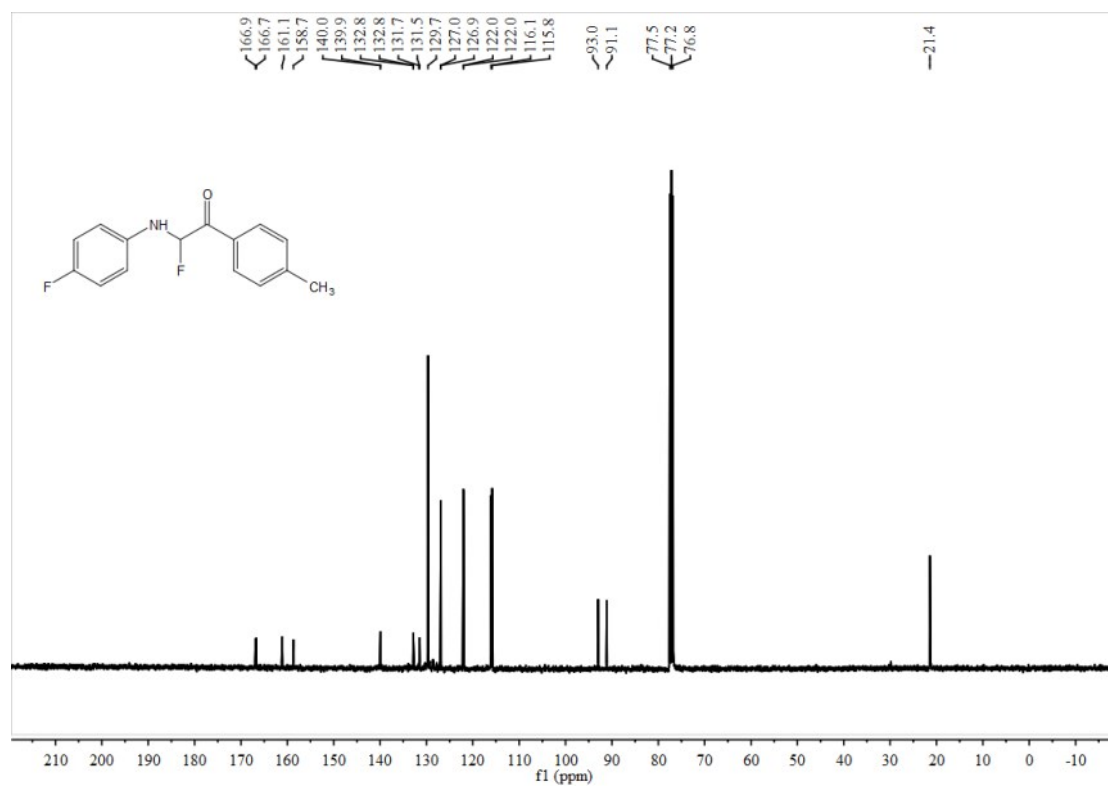

<sup>13</sup>C NMR of **3j**

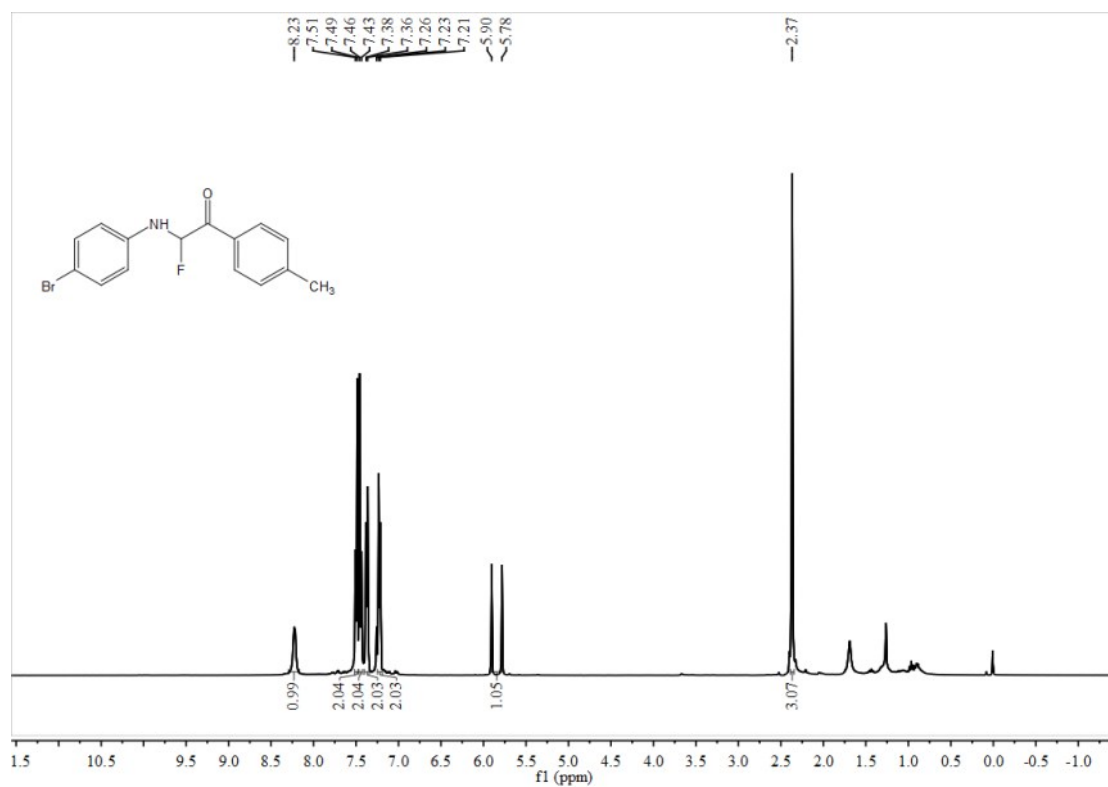

$^1\text{H}$  NMR of **3k**

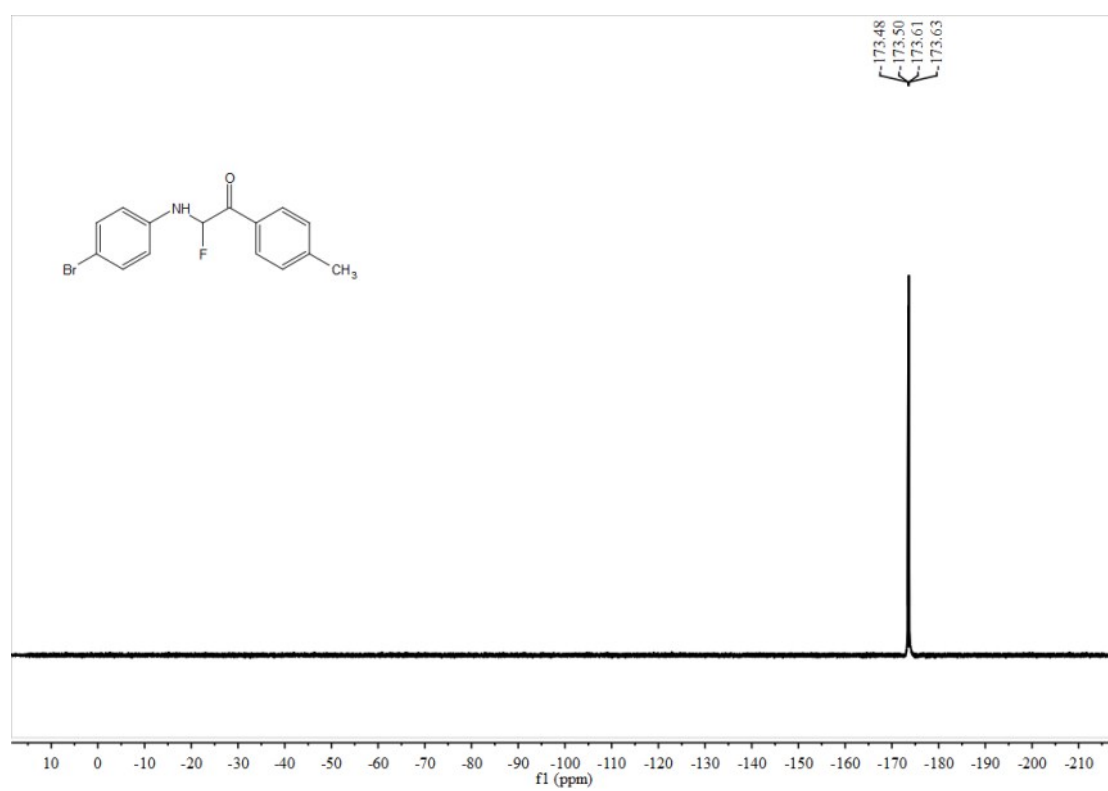

$^{19}\text{F}$  NMR of **3k**

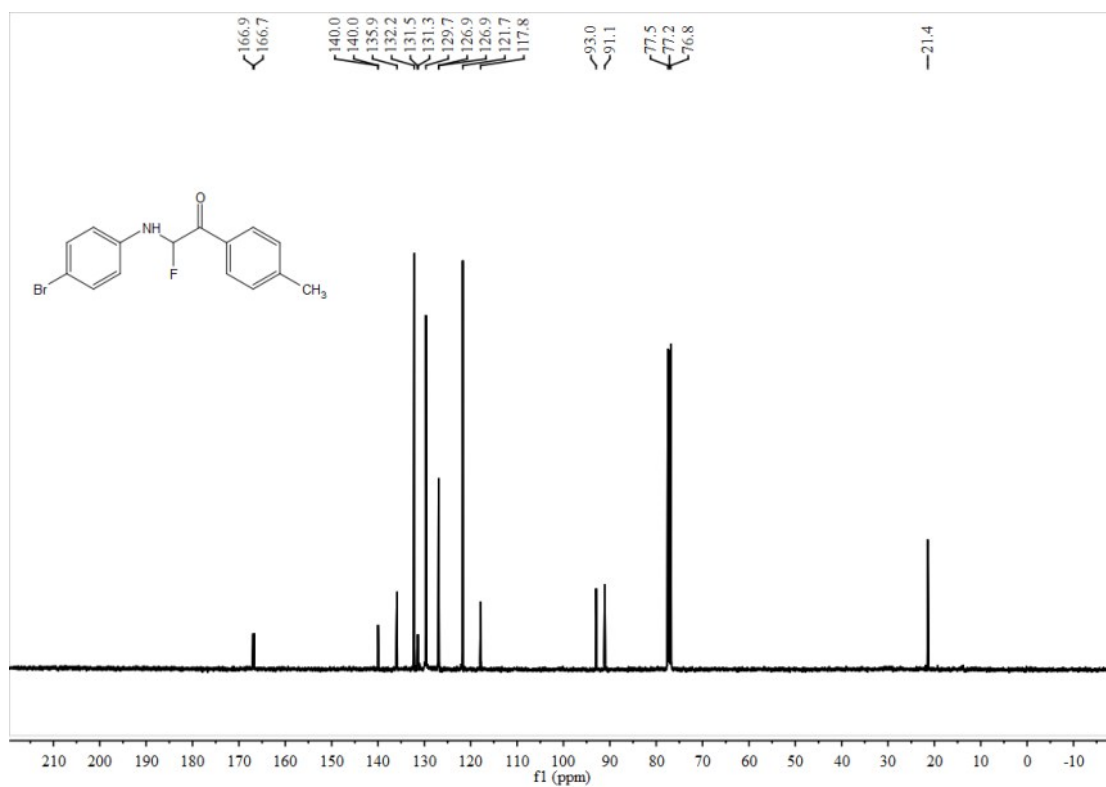

$^{13}\text{C}$  NMR of **3k**

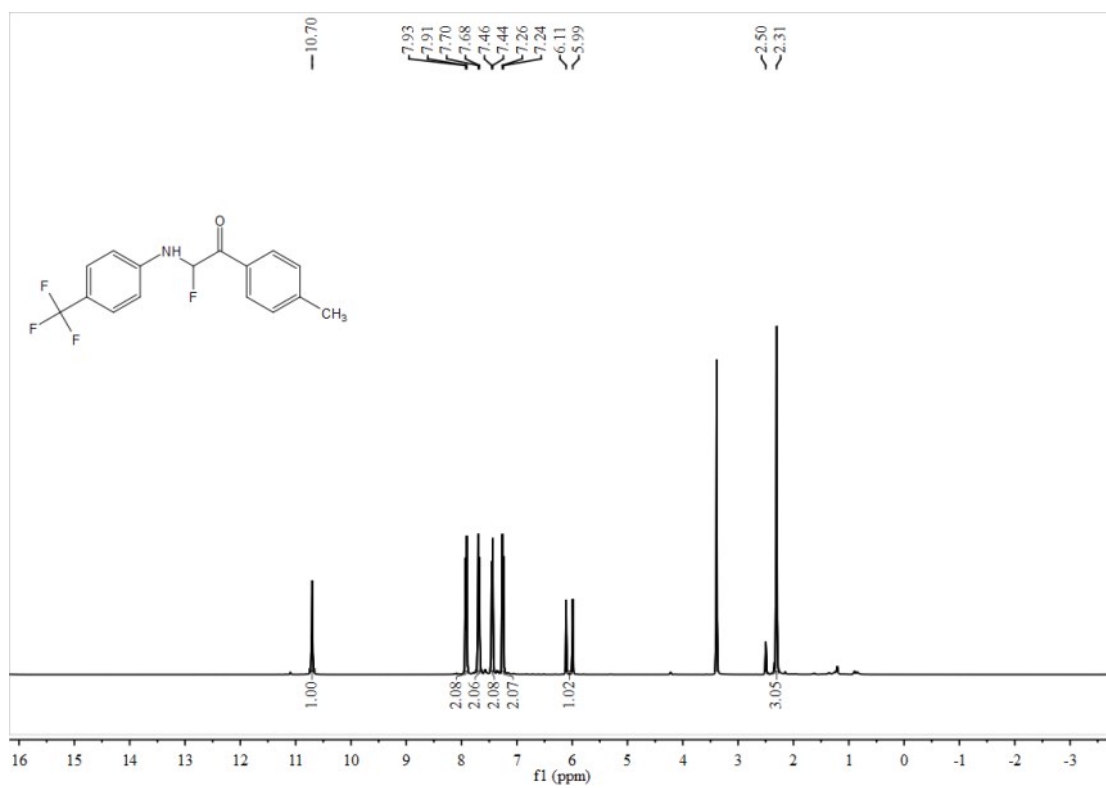

$^1\text{H}$  NMR of **3l**

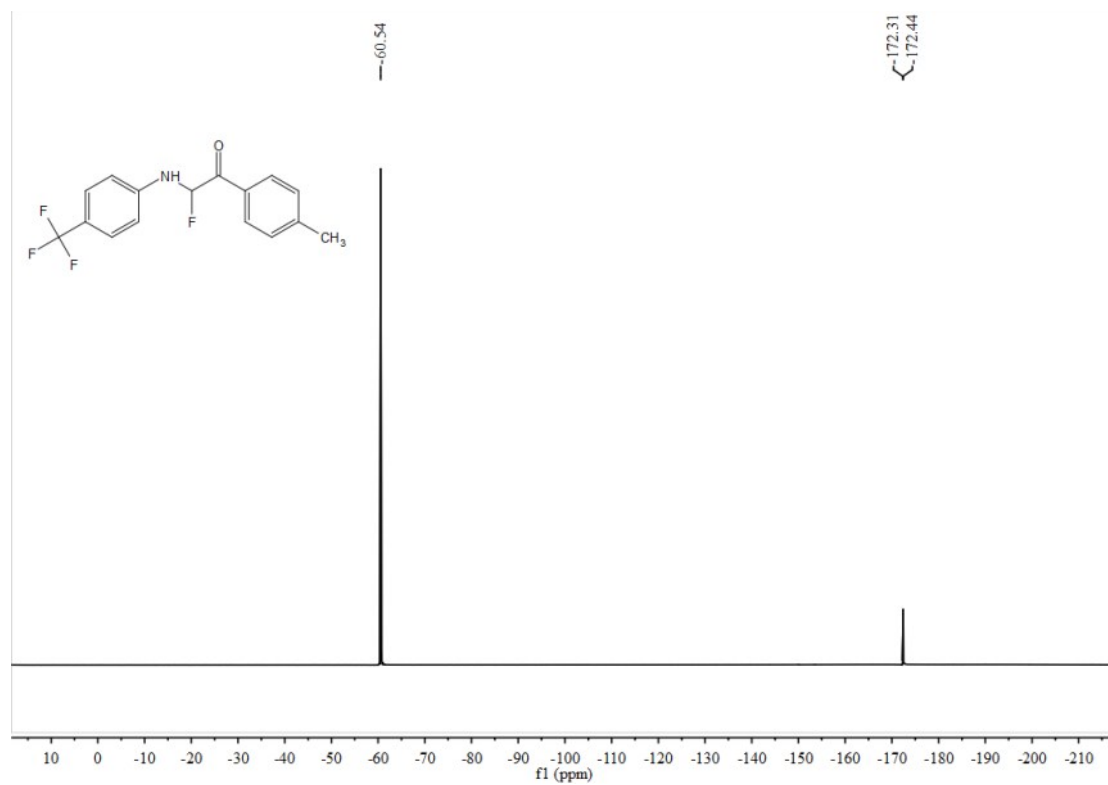

$^{19}\text{F}$  NMR of **31**

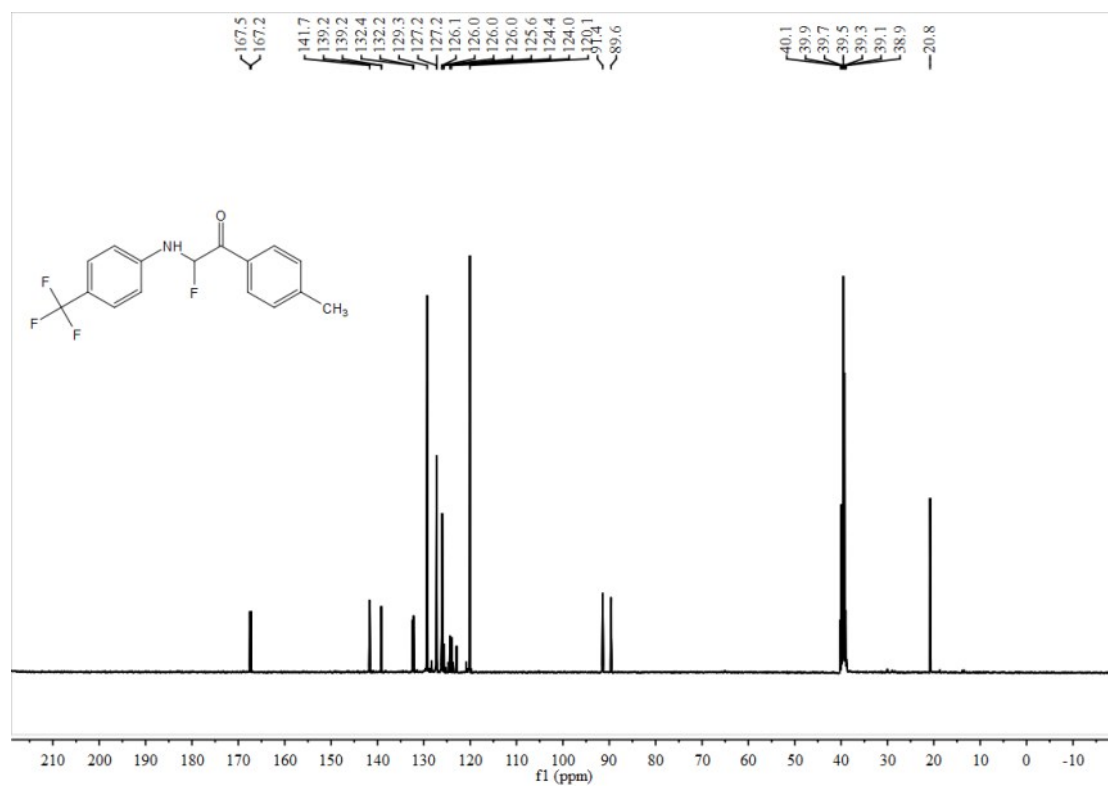

$^{13}\text{C}$  NMR of **31**

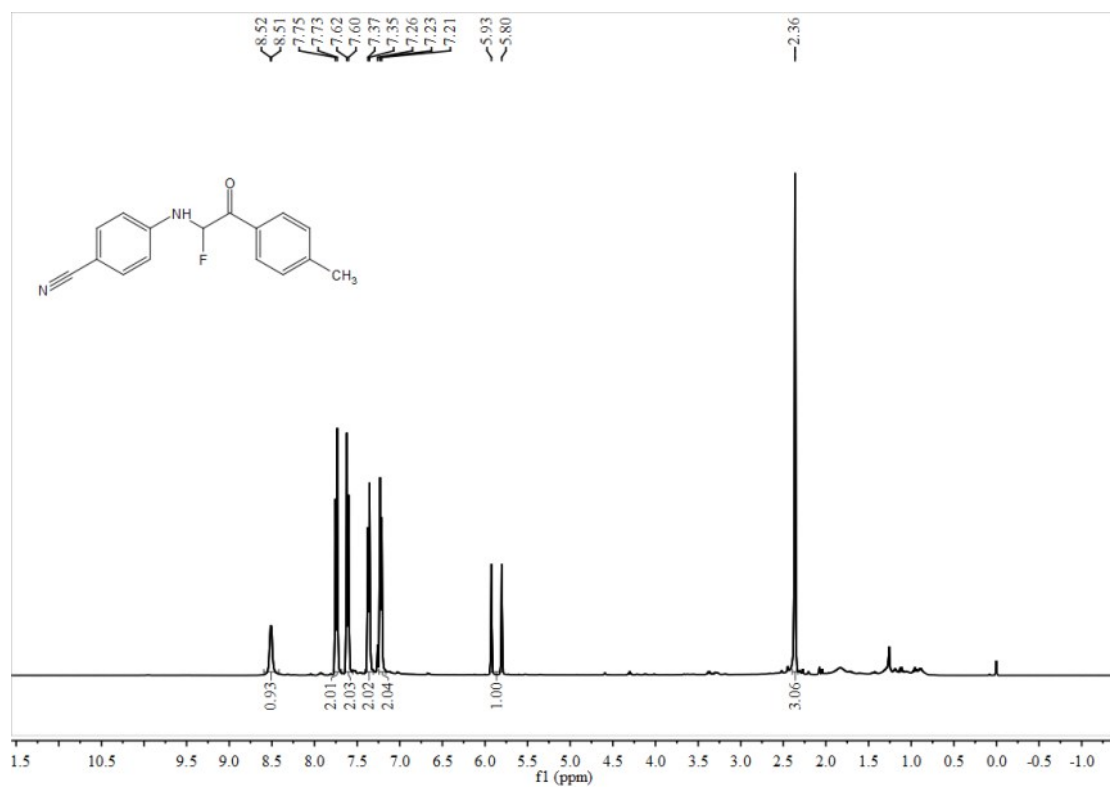

$^1\text{H}$  NMR of **3m**

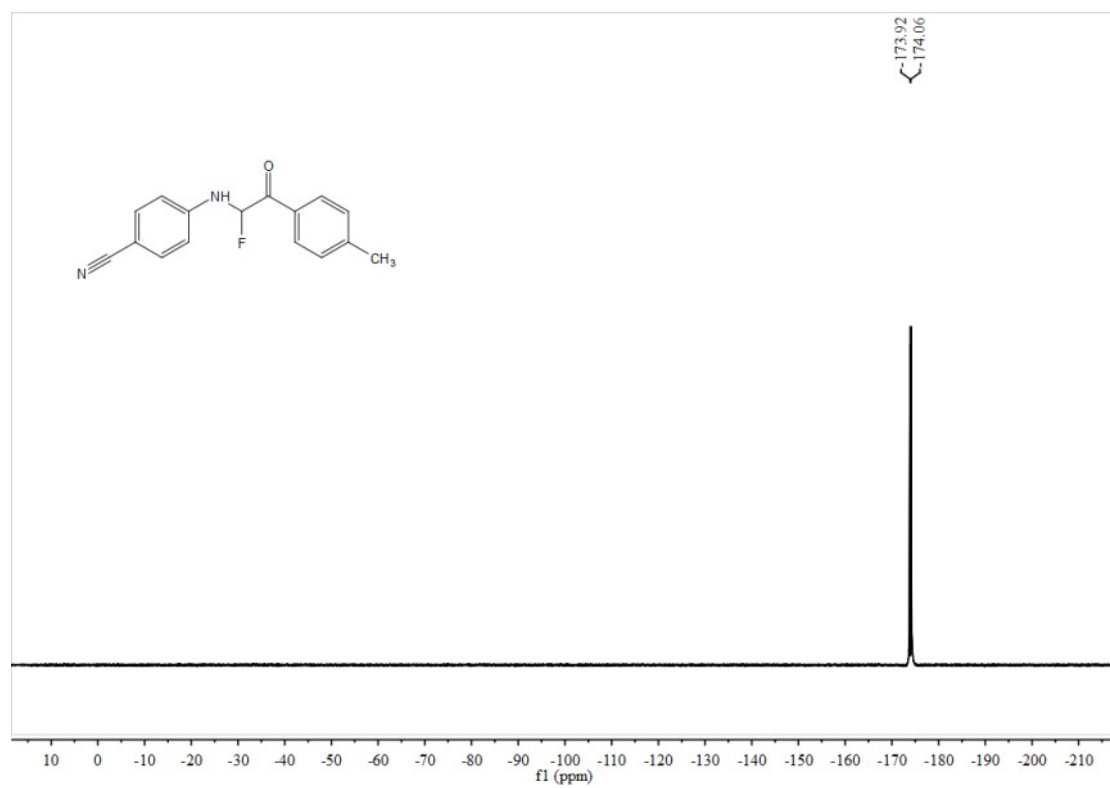

$^{19}\text{F}$  NMR of **3m**



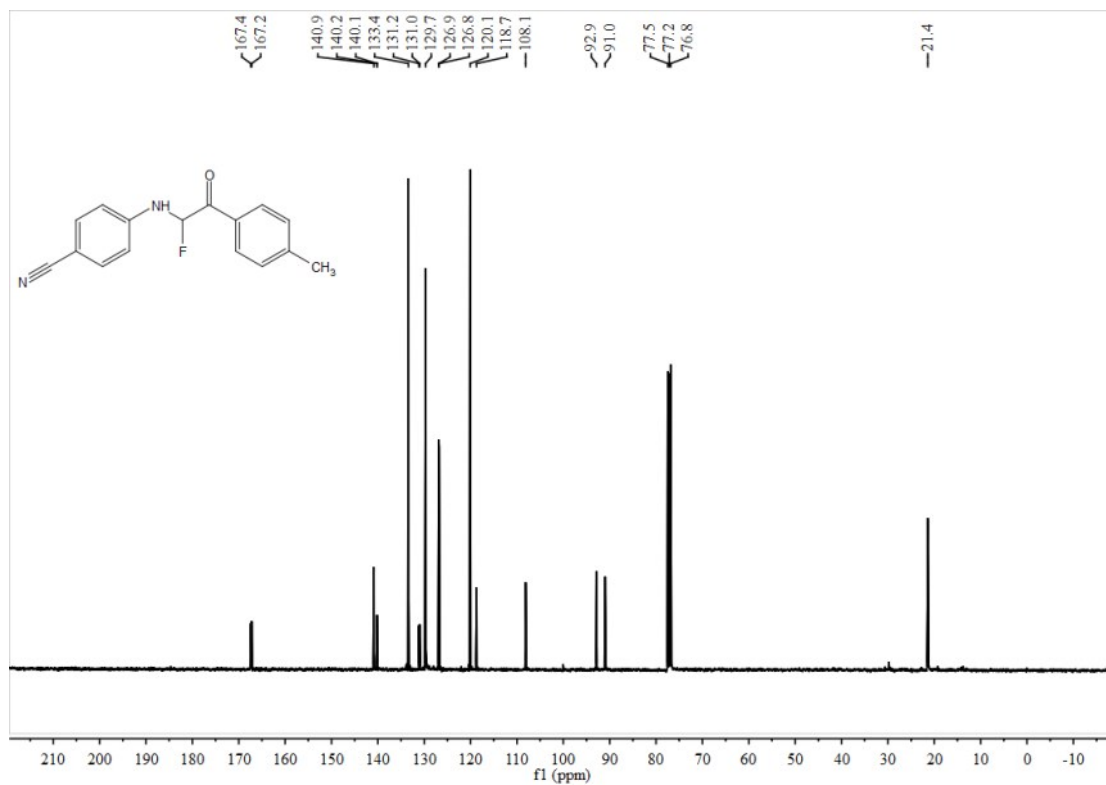

$^{13}\text{C}$  NMR of **3m**

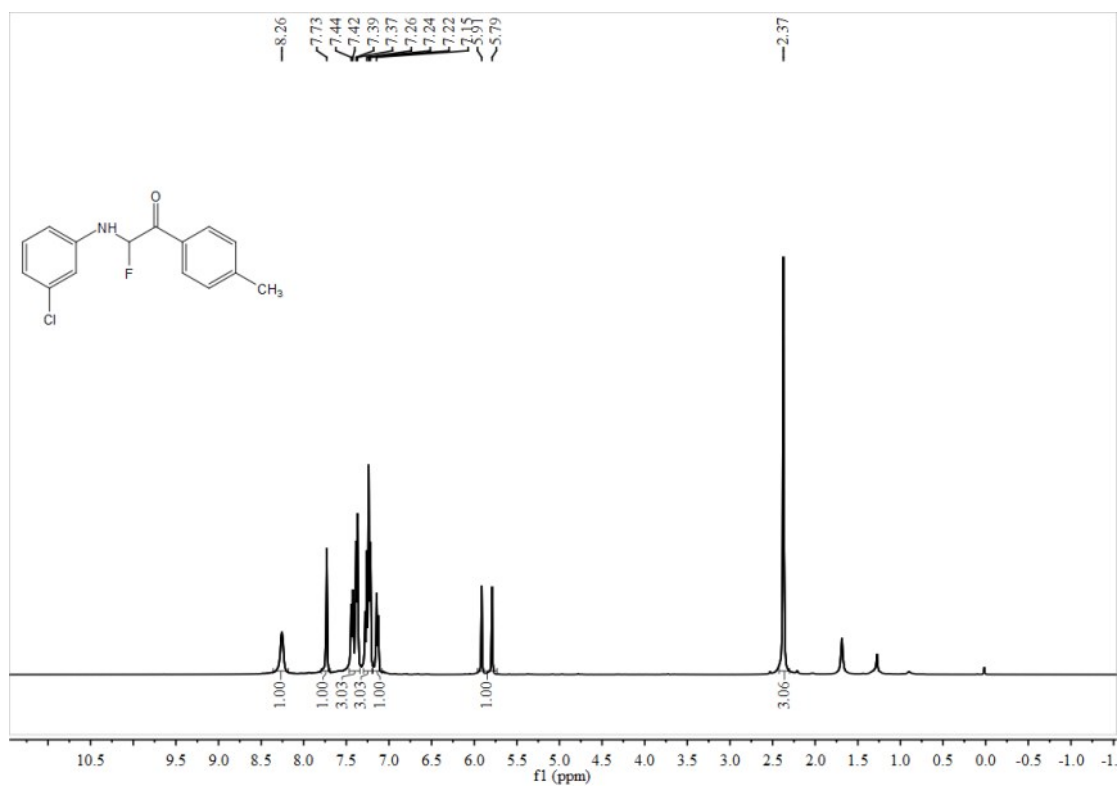

$^1\text{H}$  NMR of **3n**

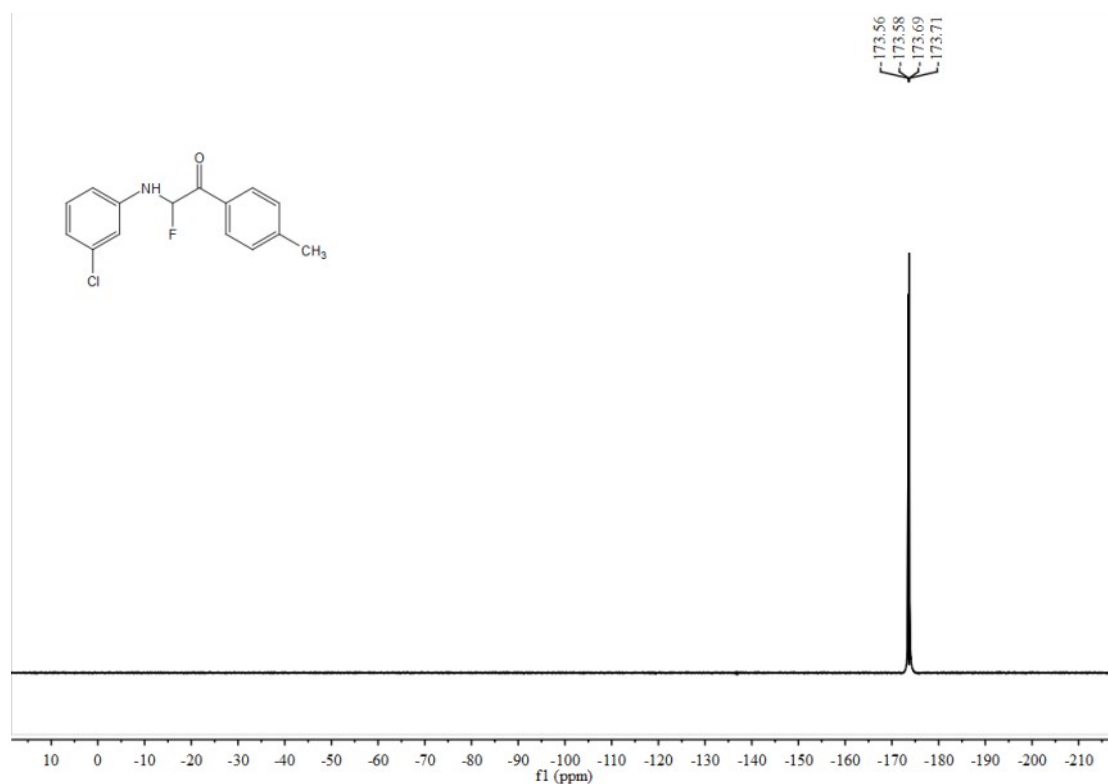

$^{19}\text{F}$  NMR of **3n**

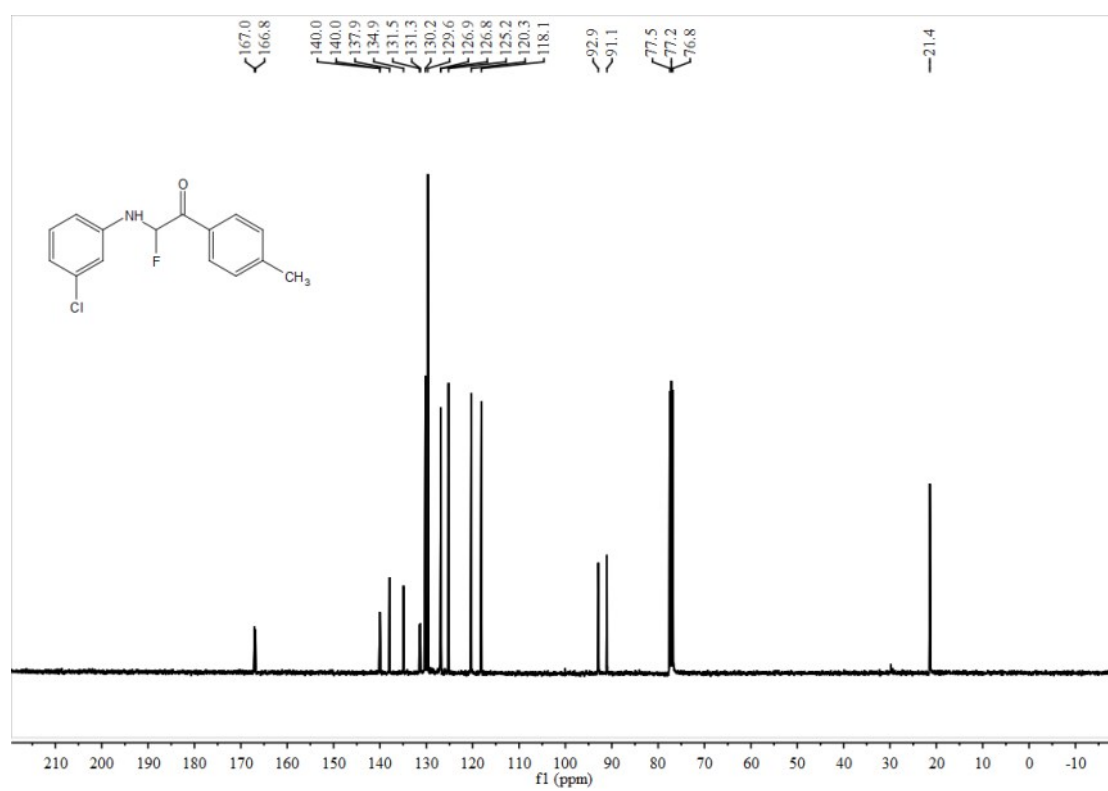

$^{13}\text{C}$  NMR of **3n**

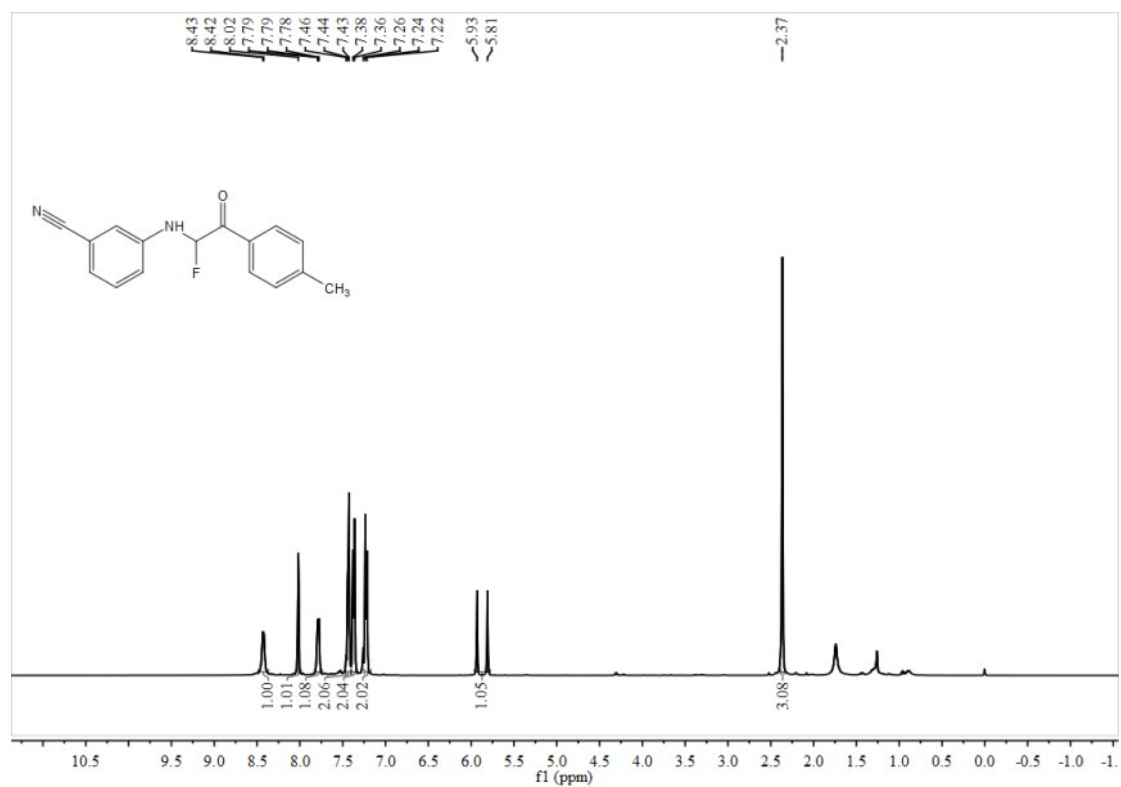

<sup>1</sup>H NMR of **3o**

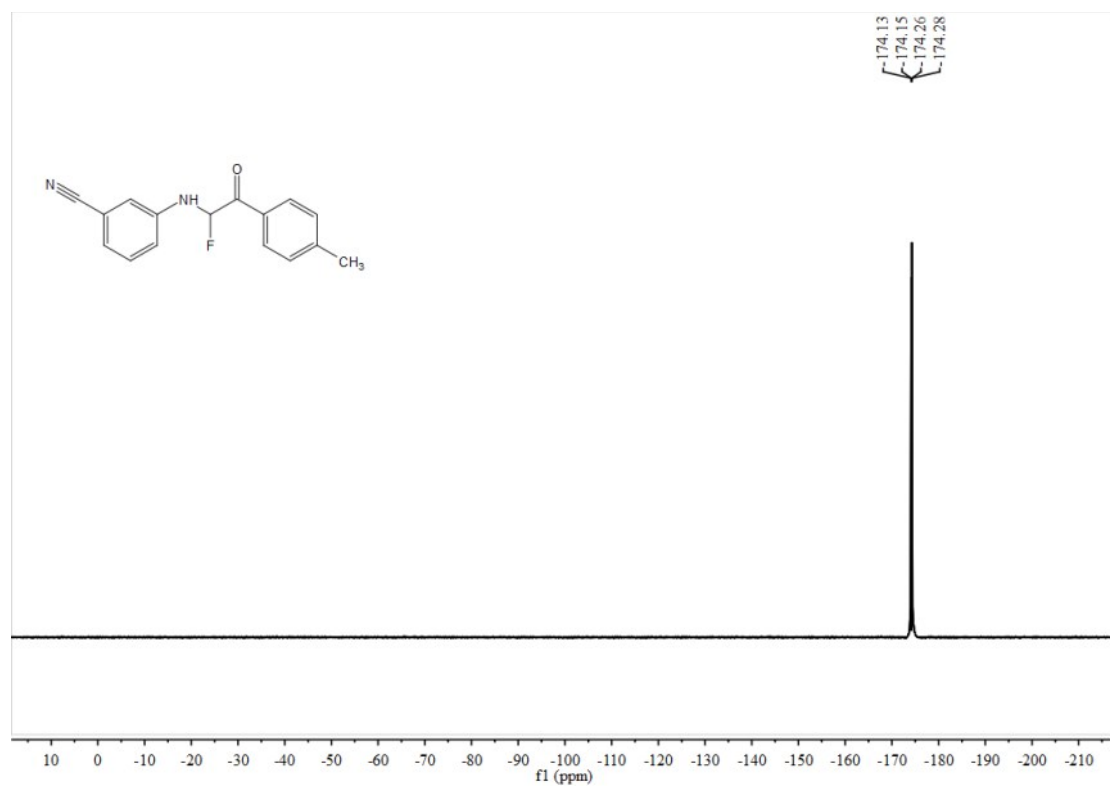

<sup>19</sup>F NMR of **3o**

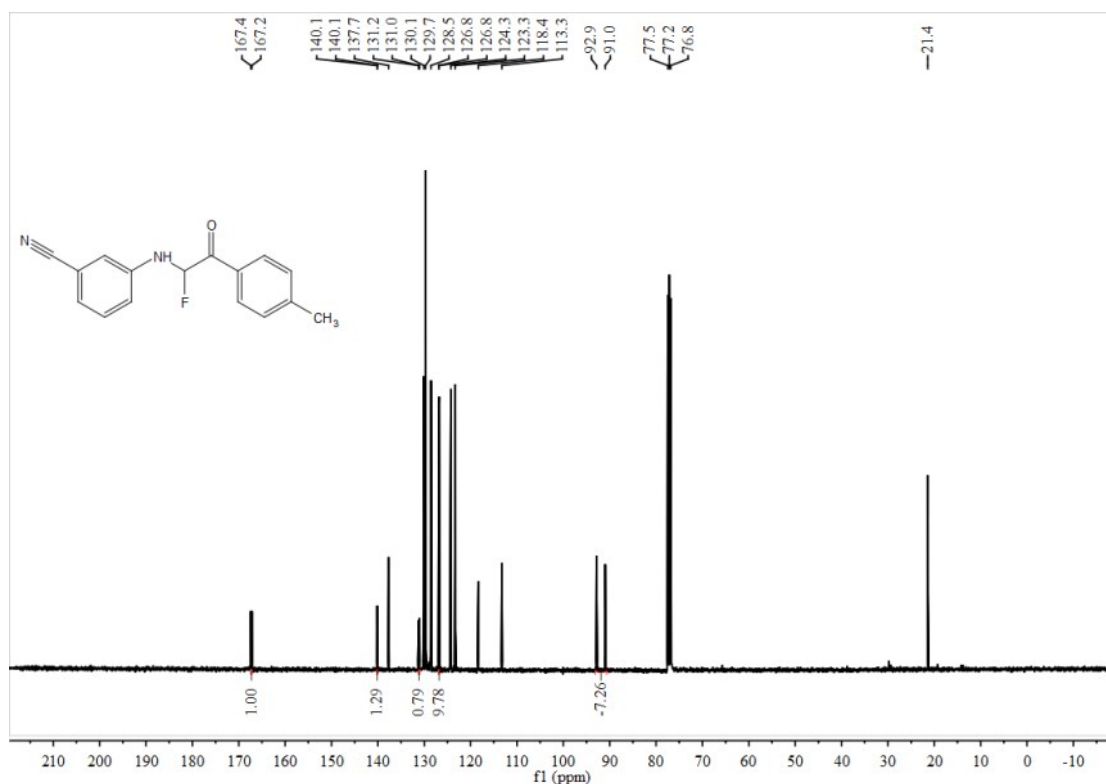

$^{13}\text{C}$  NMR of **3o**

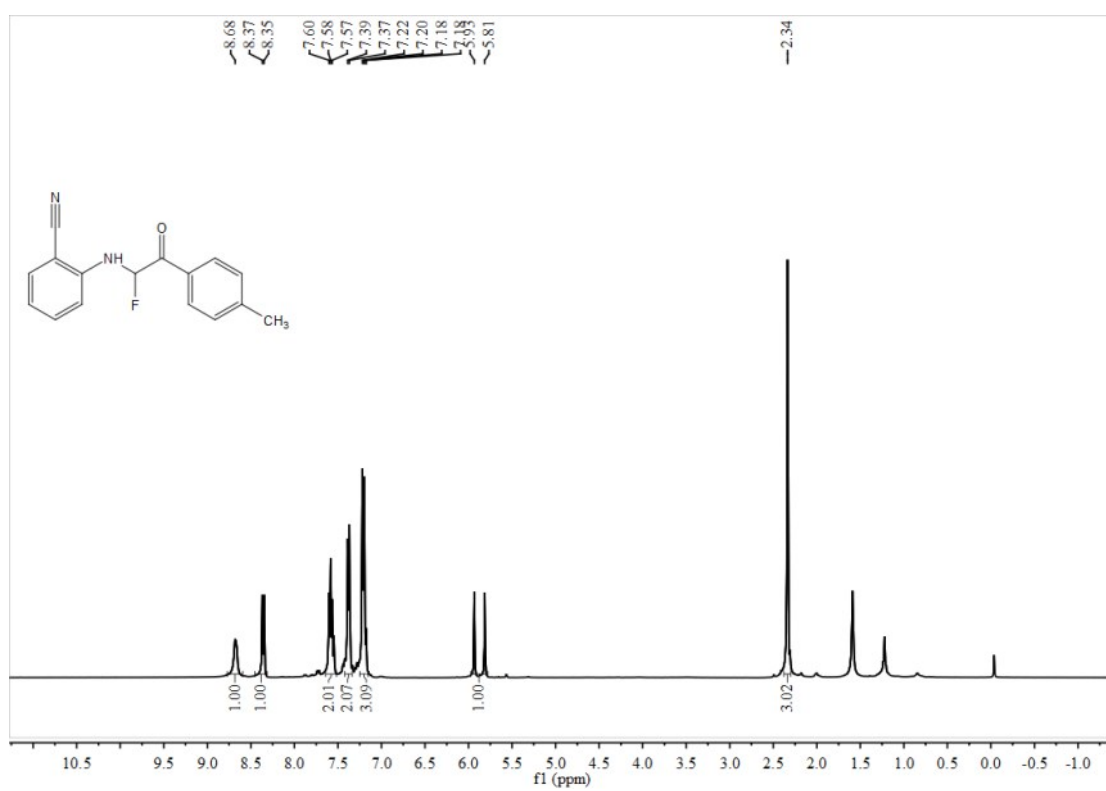

$^1\text{H}$  NMR of **3p**

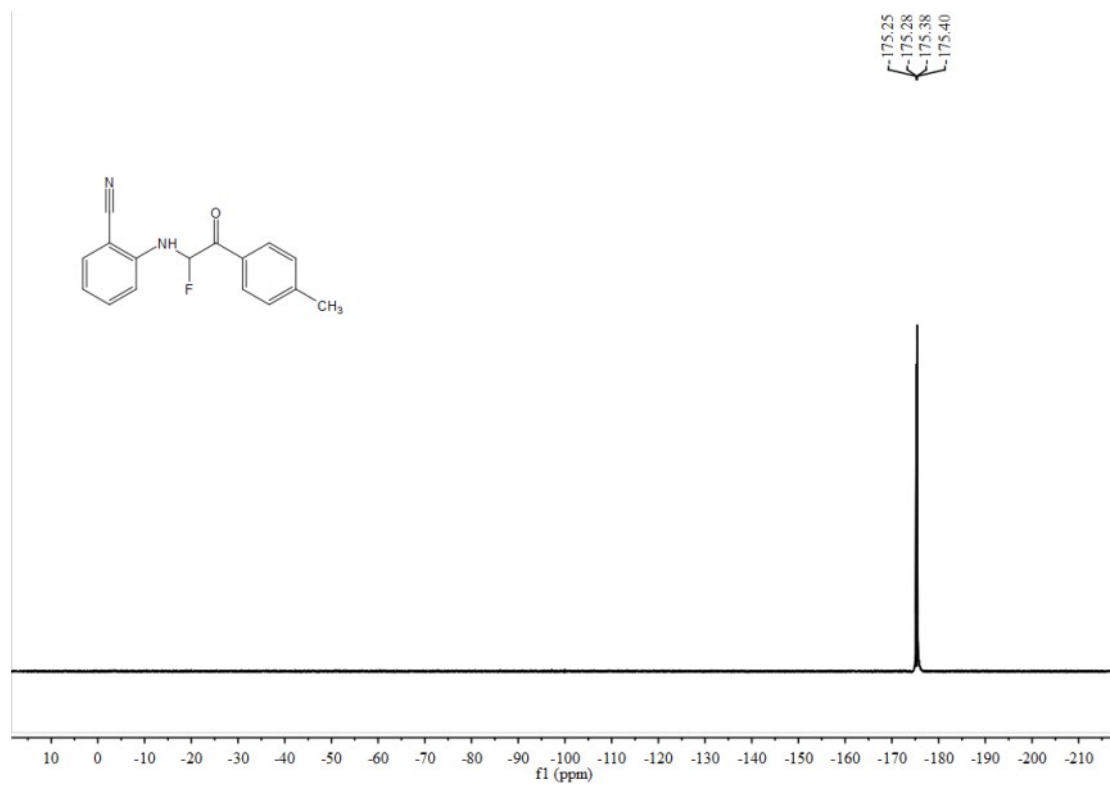

$^{19}\text{F}$  NMR of **3p**

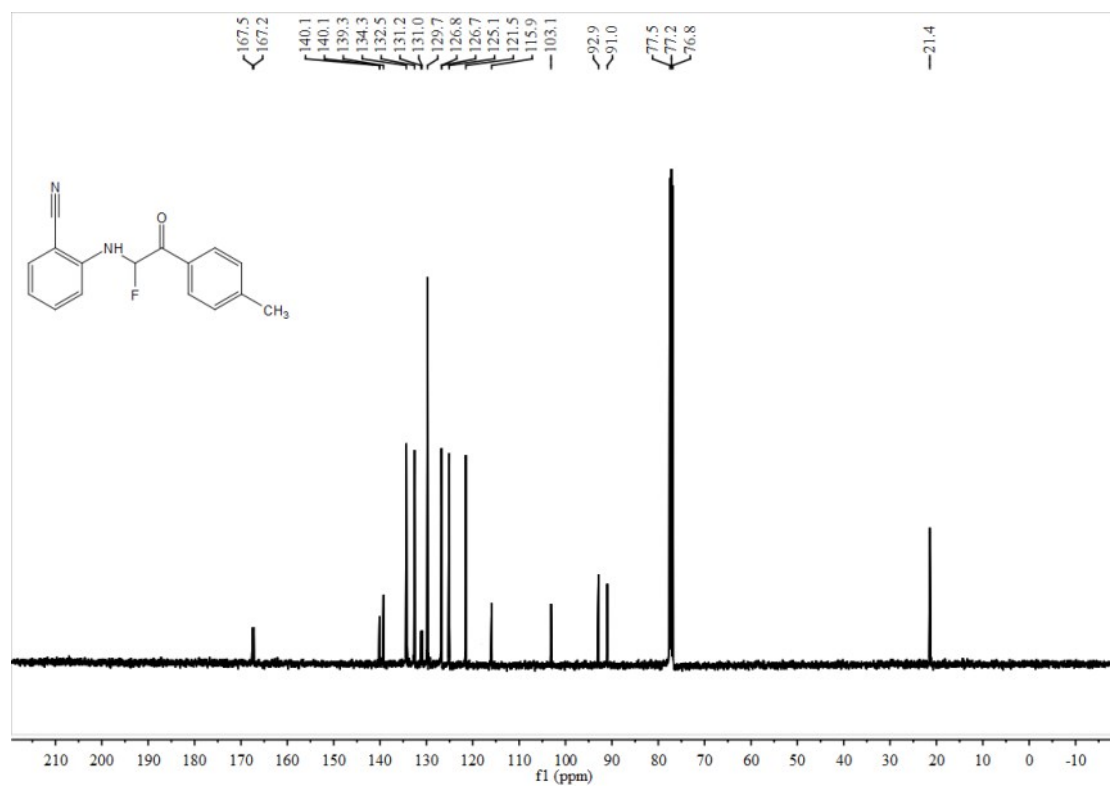

$^{13}\text{C}$  NMR of **3p**

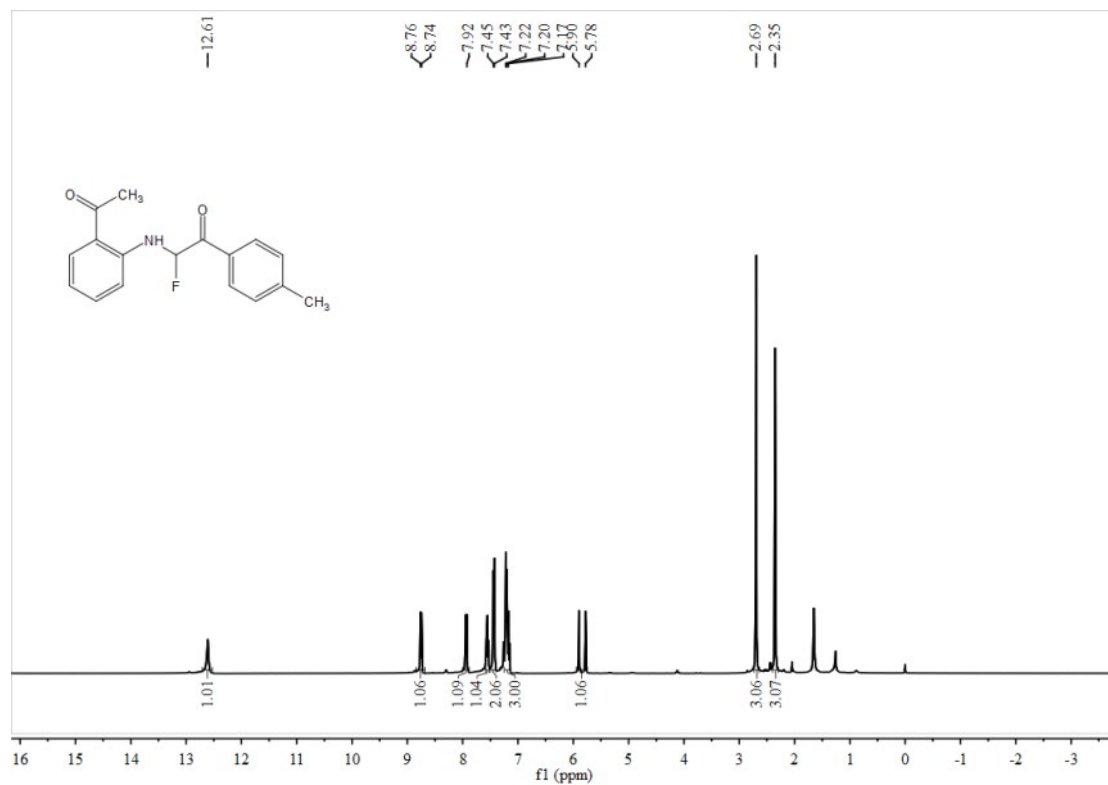

<sup>1</sup>H NMR of **3q**

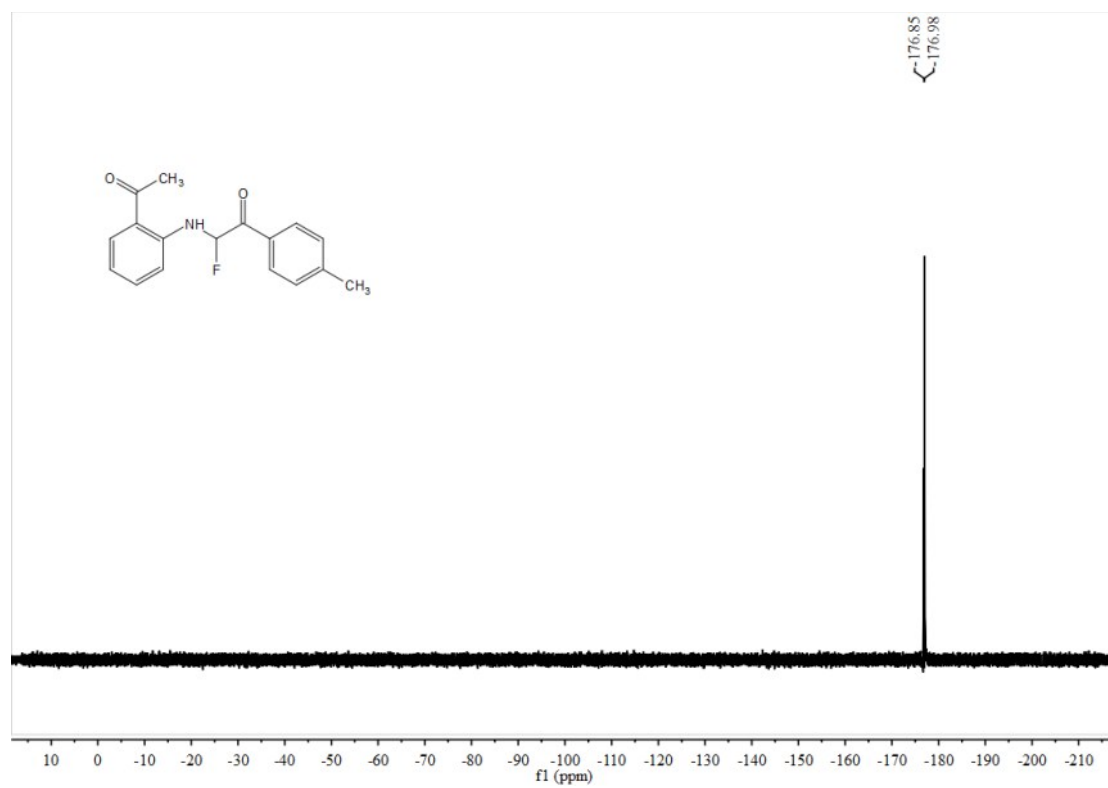

<sup>19</sup>F NMR of **3q**

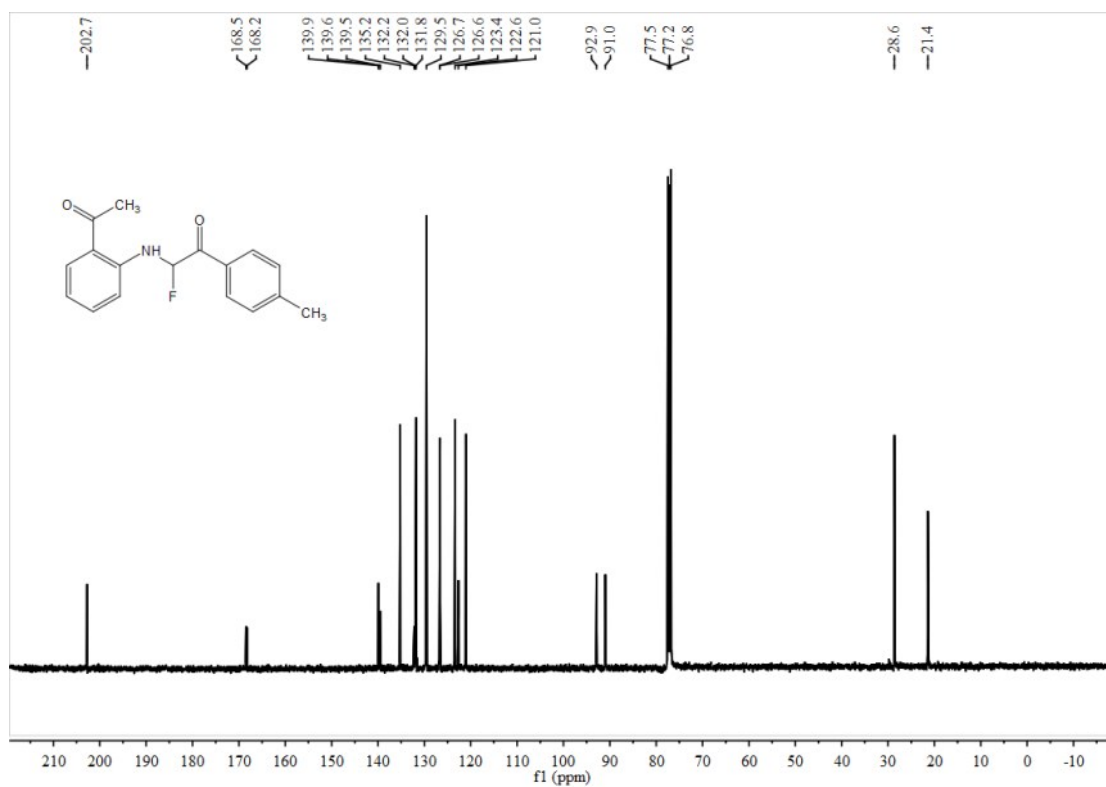

$^{13}\text{C}$  NMR of **3q**

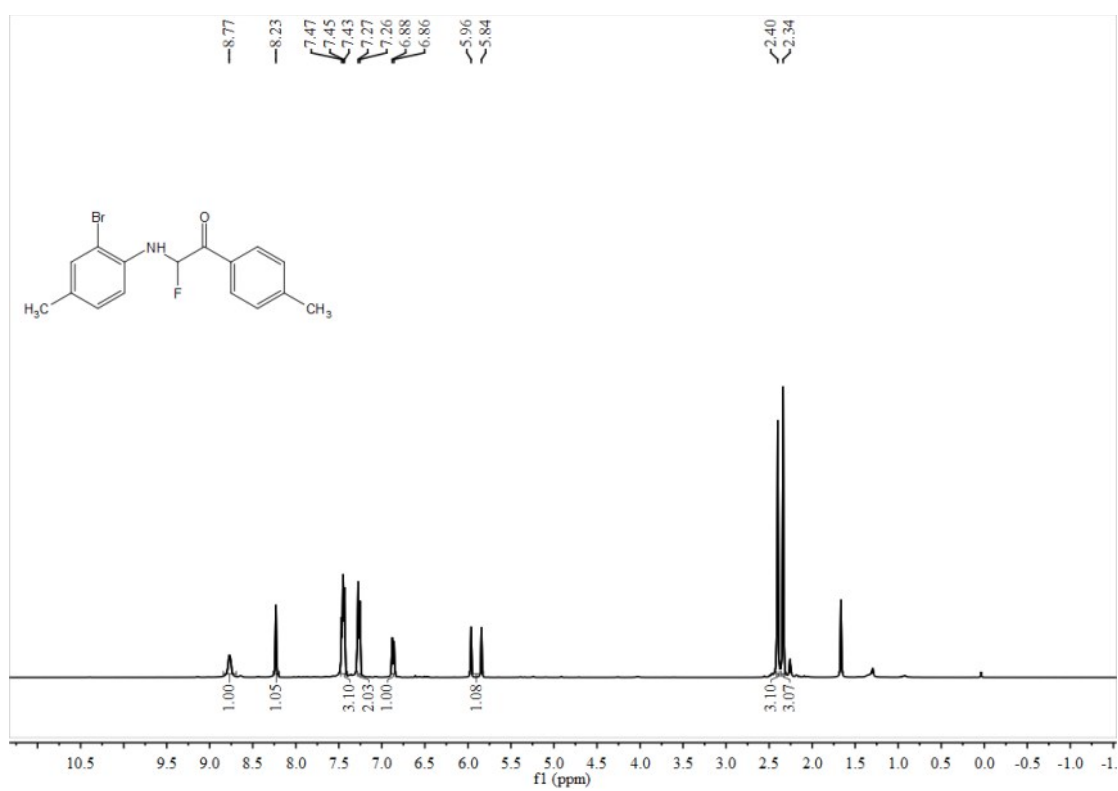

$^1\text{H}$  NMR of **3r**

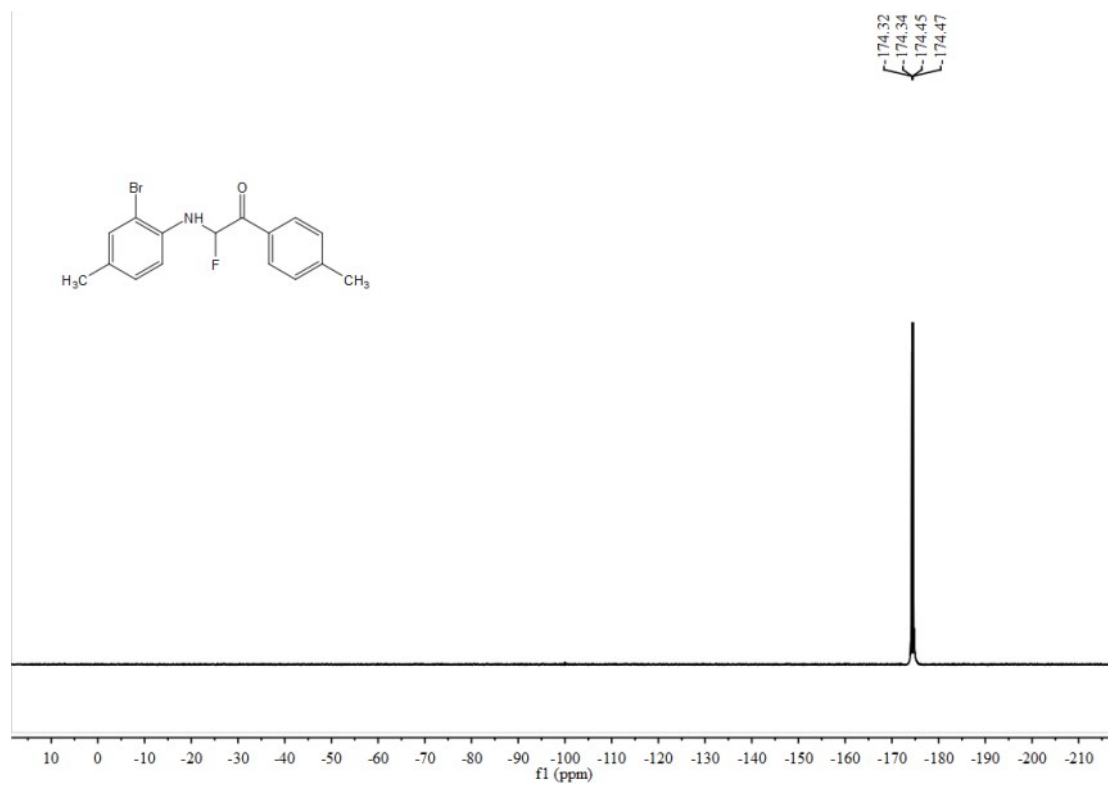

$^{19}\text{F}$  NMR of **3r**

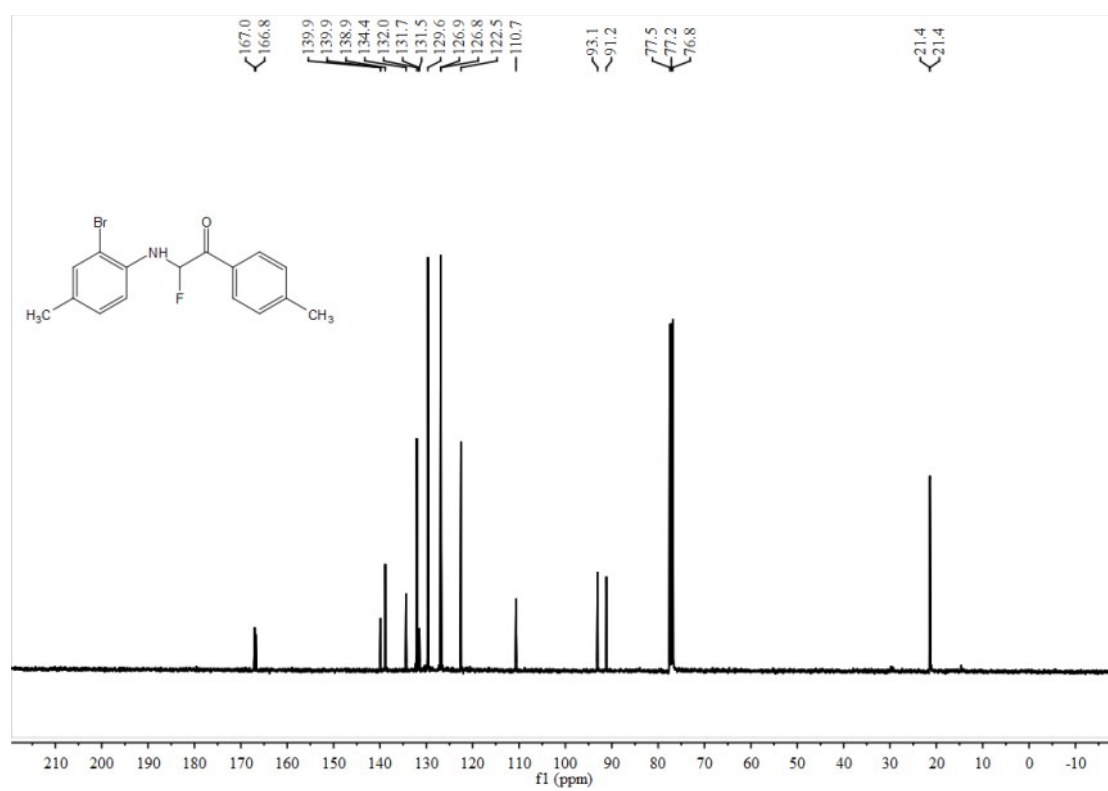

$^{13}\text{C}$  NMR of **3r**



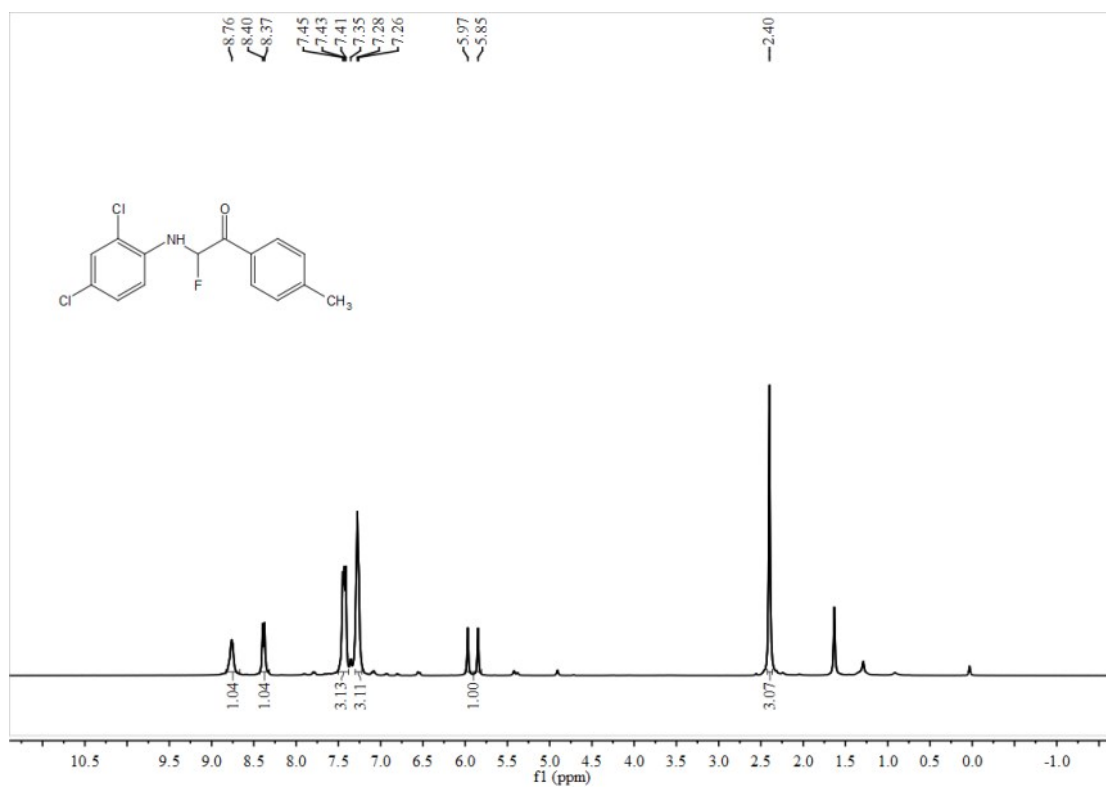

<sup>1</sup>H NMR of **3s**

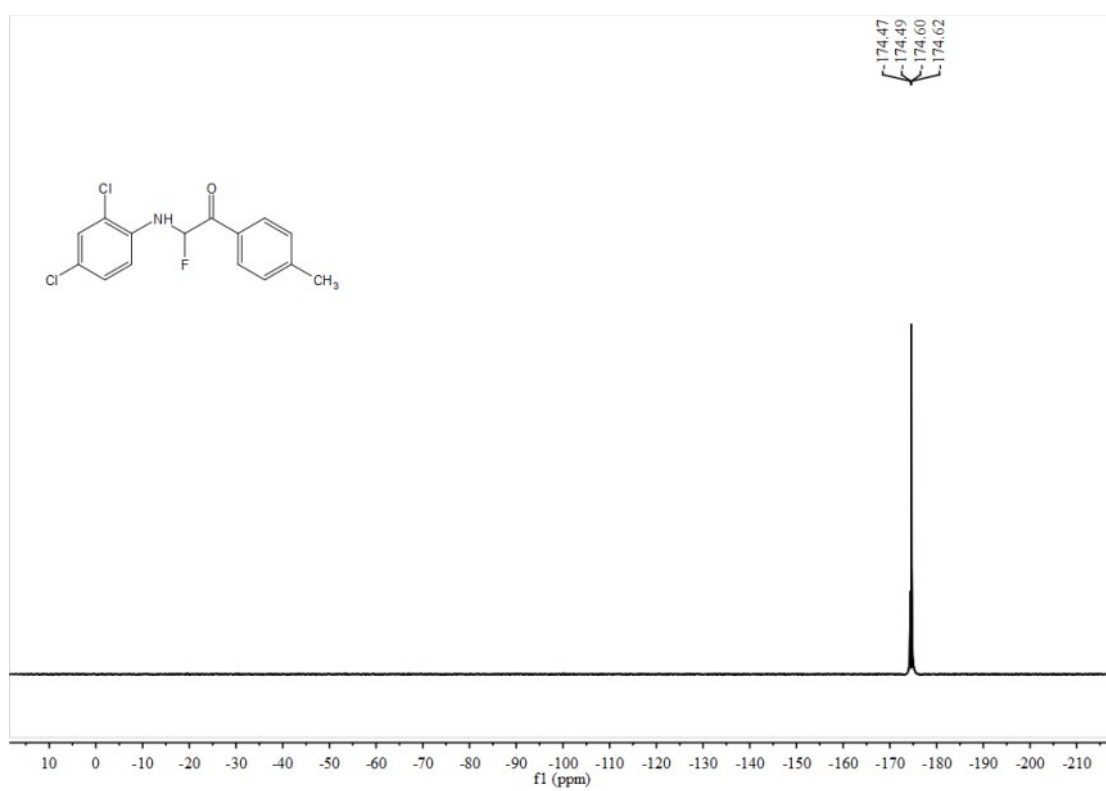

<sup>19</sup>F NMR of **3s**

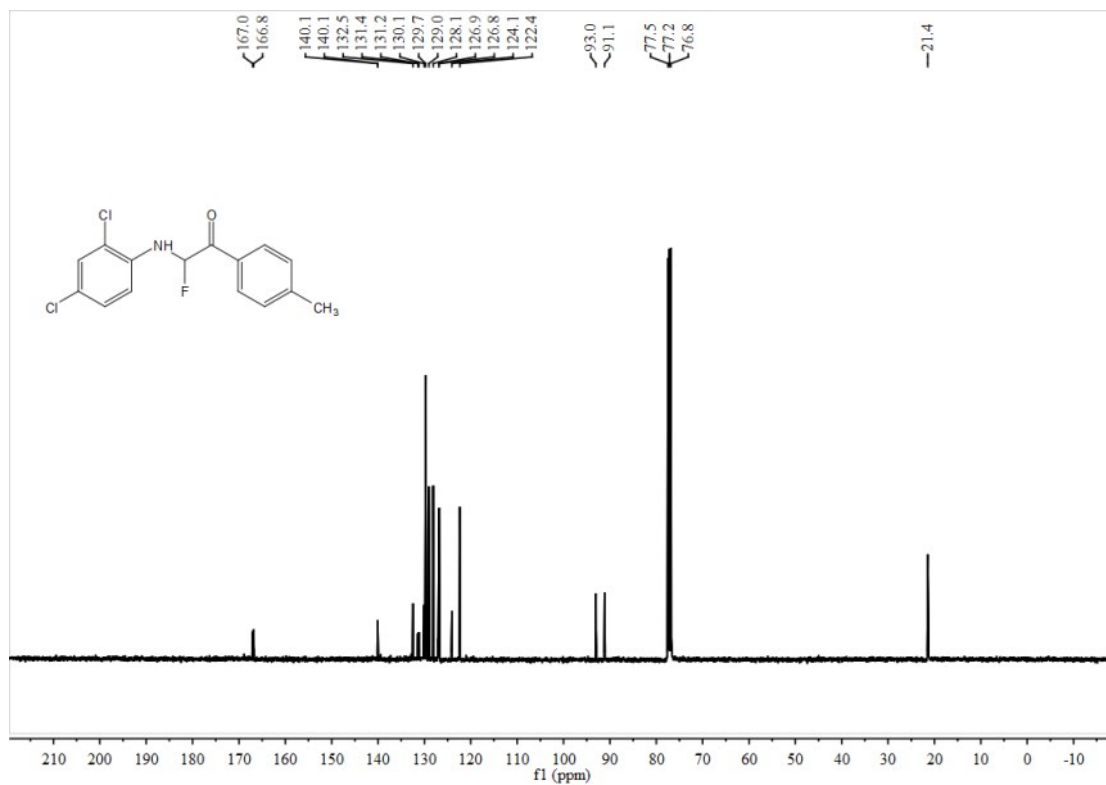

$^{13}\text{C}$  NMR of **3s**

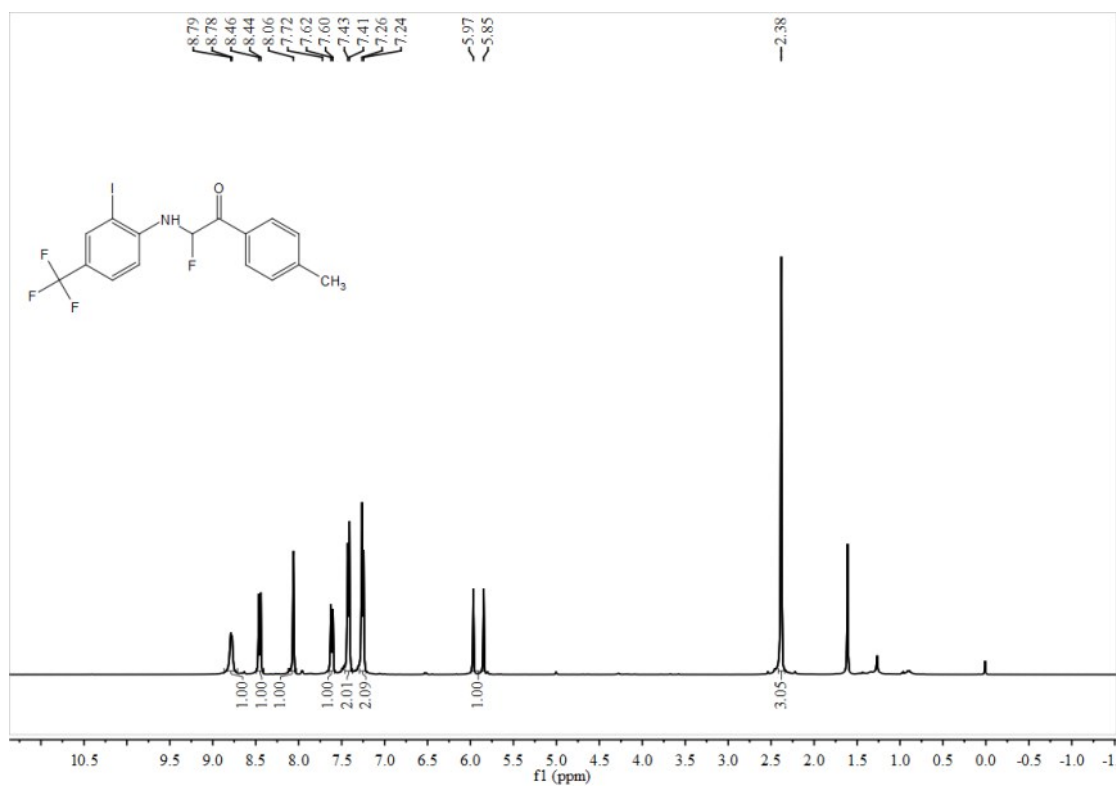

$^1\text{H}$  NMR of **3t**

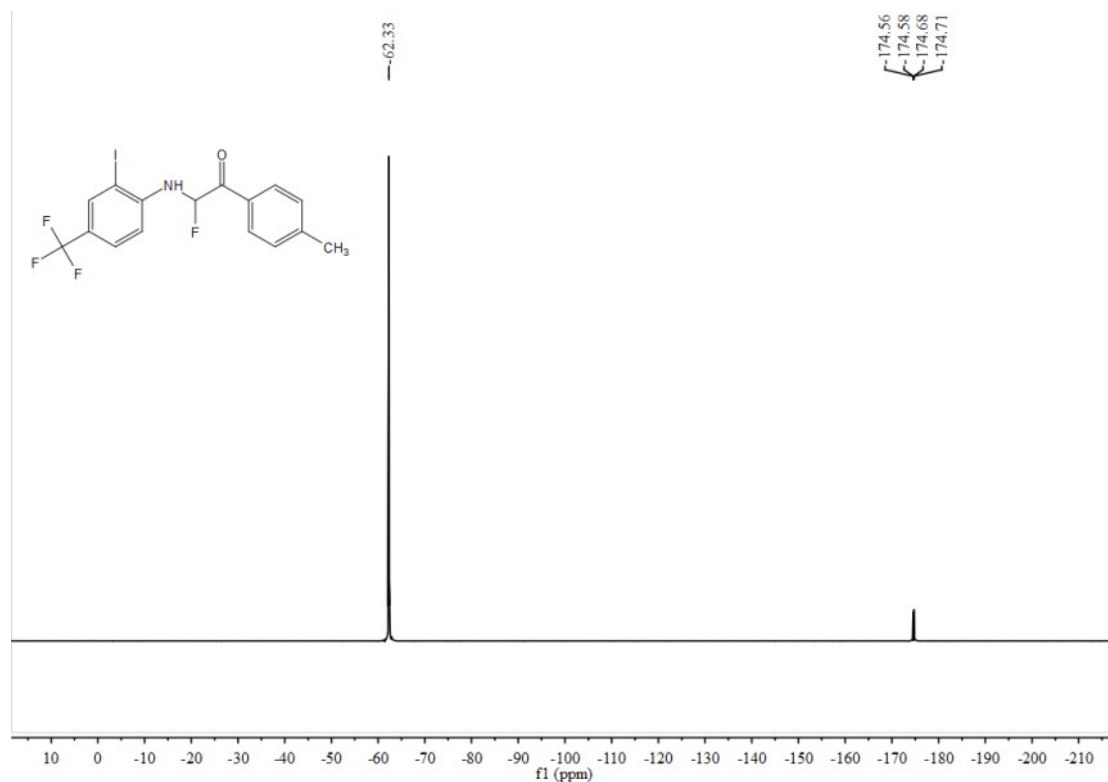

$^{19}\text{F}$  NMR of **3t**

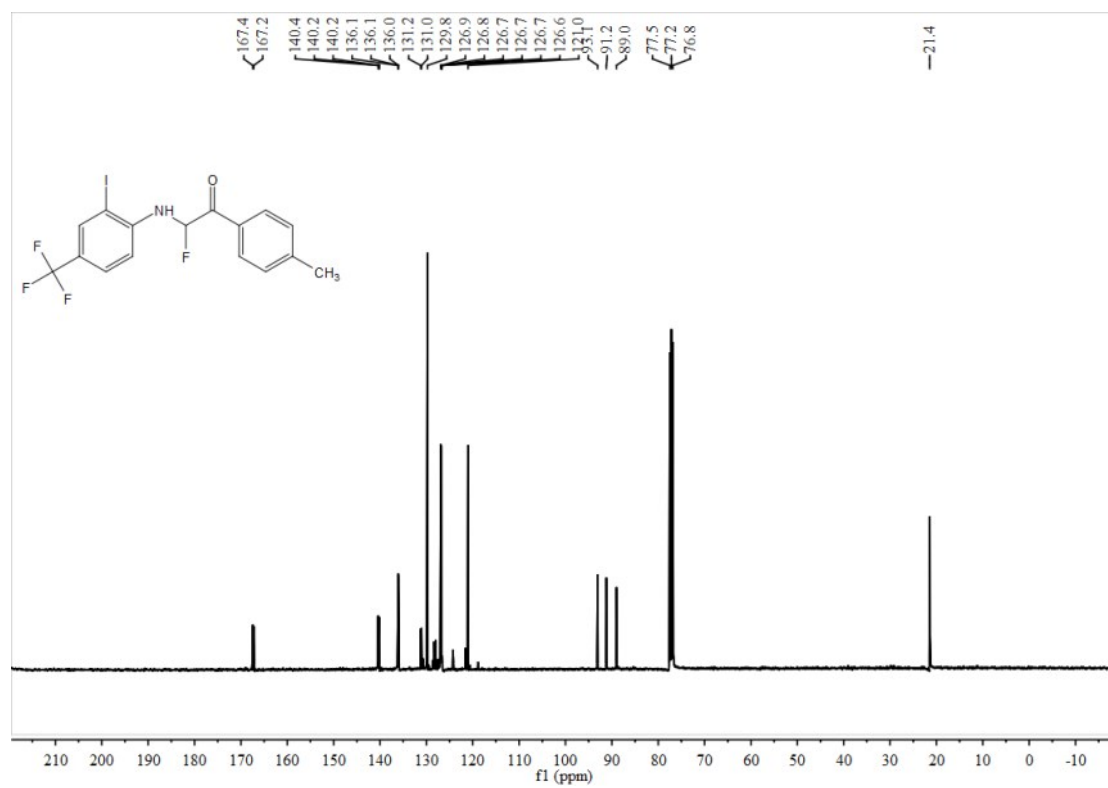

$^{13}\text{C}$  NMR of **3t**

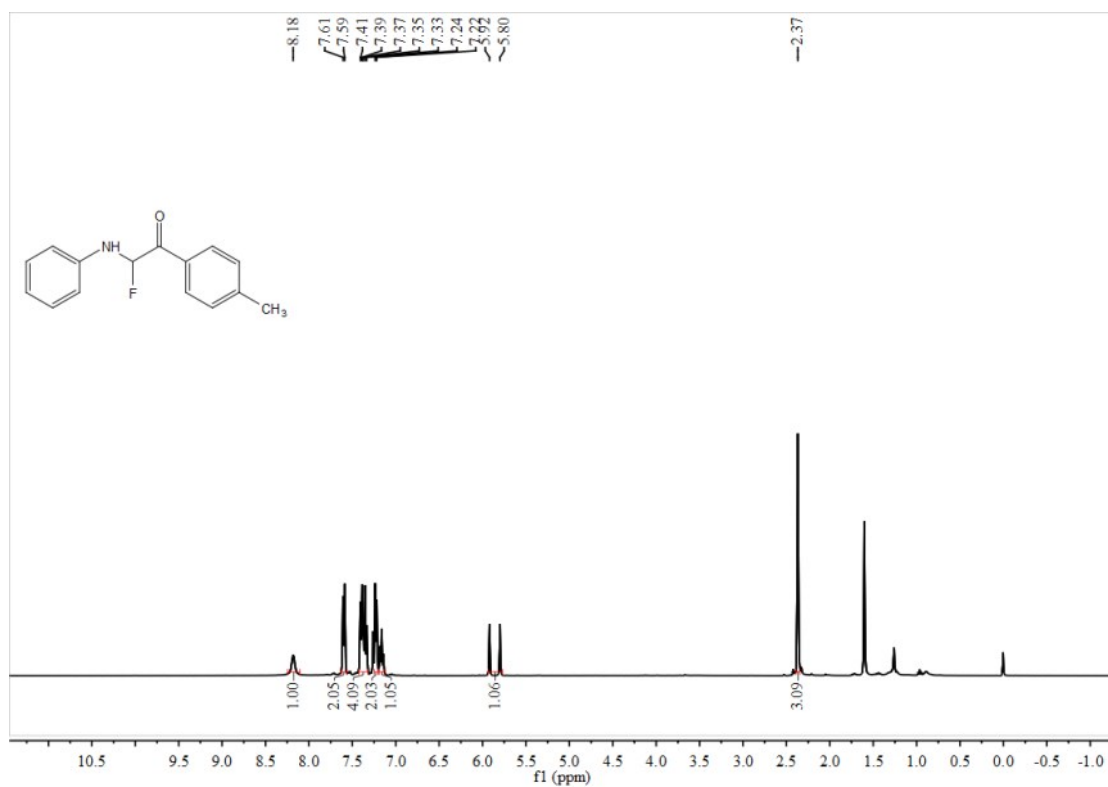

<sup>1</sup>H NMR of **3u**

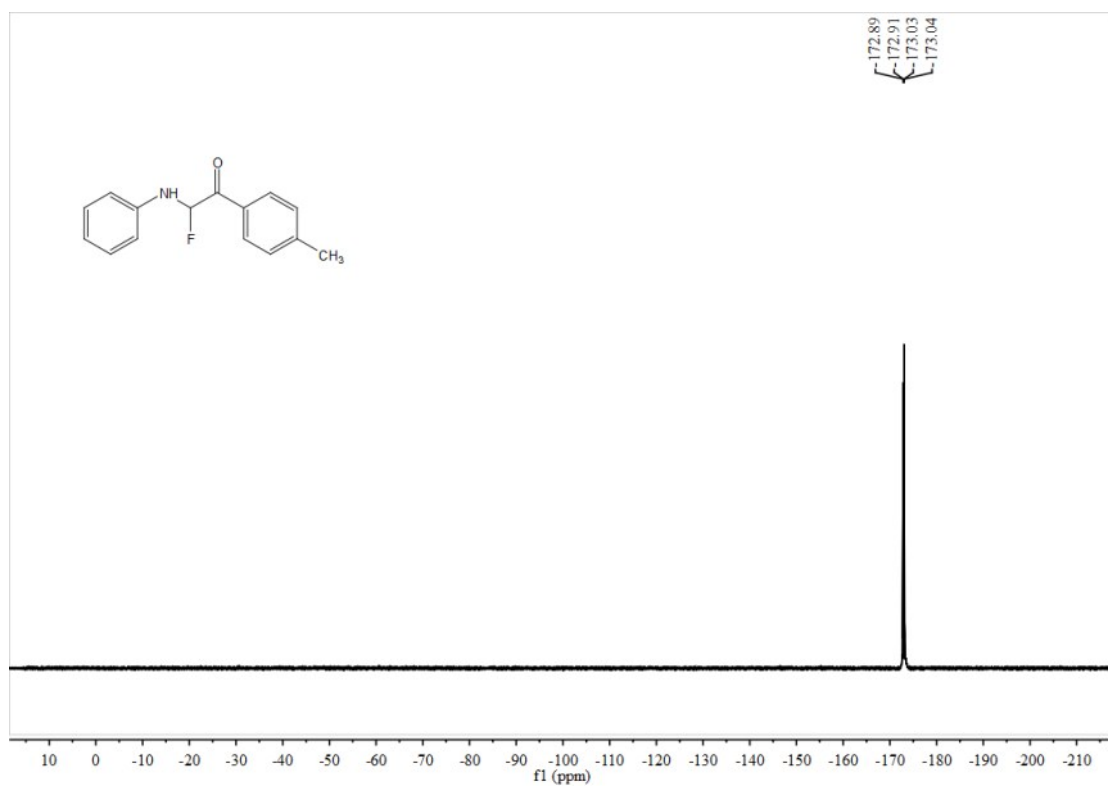

<sup>19</sup>F NMR of **3u**

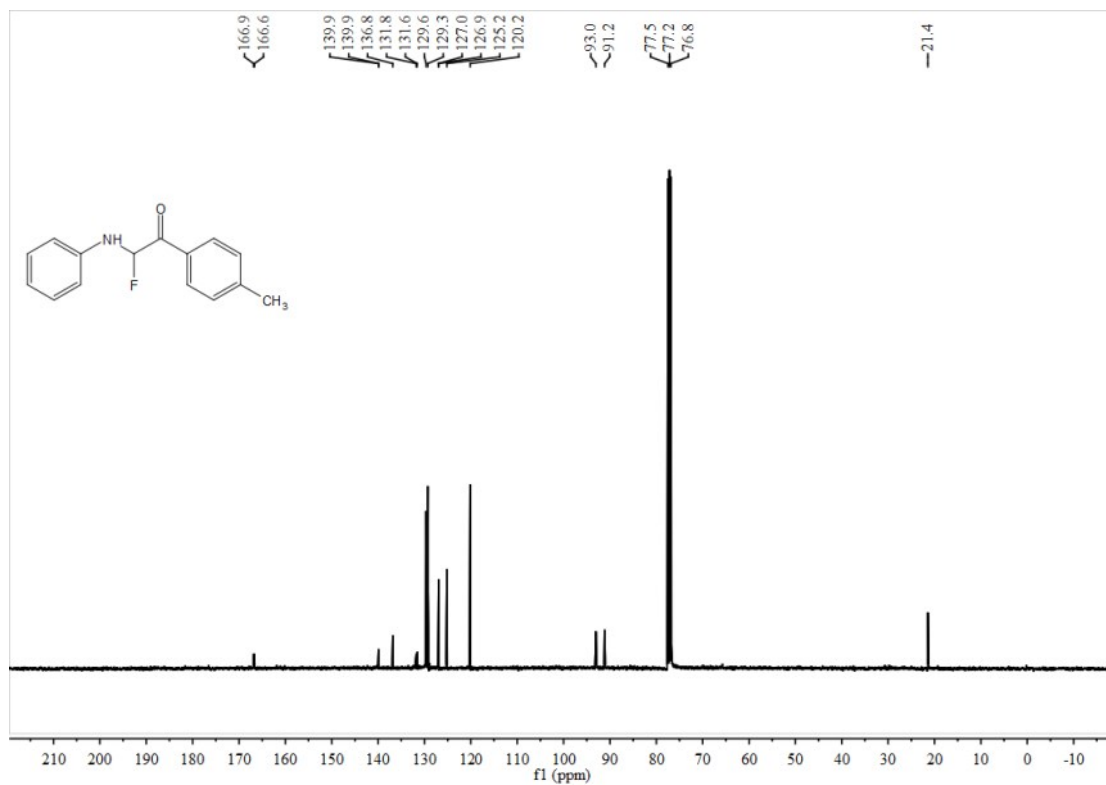

$^{13}\text{C}$  NMR of **3u**
